# Supplementary material for: 12-months metabolic changes among gender dysphoric individuals under cross-sex hormone treatment: a targeted metabolomics study
Source: PubMed Central journal article supplement (PMC5105120; doi:10.1038/srep37005), 2016-11-11
Supplement: srep37005-s1.pdf [file srep37005-s1.pdf]

## **12-months metabolic changes among gender dysphoric individuals under cross-sex hormone treatment: a targeted metabolomics study**

Matthias K. Auer<sup>1+\*</sup>, Alexander Cecil<sup>2\*</sup>, Yasmin Roepke<sup>1</sup>, Charlotte Bultynck<sup>3</sup>, Charlotte Pas<sup>3</sup>, Johannes Fuss<sup>4</sup>, Cornelia Prehn<sup>2</sup>, Rui Wang-Sattler<sup>5</sup>, Jerzy Adamski<sup>2, 6, 7</sup>, Günter K. Stalla<sup>1</sup>, Guy T'Sjoen<sup>3</sup>

<sup>1</sup>Endocrinology, Diabetology and Internal Medicine, Max Planck Institute of Psychiatry, Munich, Germany

<sup>2</sup> Helmholtz Zentrum München, German Research Center for Environmental Health, Institute of Experimental Genetics, Genome Analysis Center, Neuherberg, Germany

<sup>3</sup>Department of Endocrinology and Center for Sexology and Gender, Ghent University Hospital, Ghent, Belgium

<sup>4</sup>Institute for Sex Research and Forensic Psychiatry, University Medical Center Hamburg-Eppendorf, Hamburg, Germany

<sup>5</sup>Institute of Epidemiology II, Helmholtz Zentrum München, Neuherberg, Germany

<sup>6</sup> Lehrstuhl für Experimentelle Genetik, Technische Universität München, Freising-Weihenstephan, Germany

<sup>7</sup> German Center for Diabetes Research (DZD), Neuherberg, Germany

Supplement table 1

| Metabolite | Commonly used name          | Attached Synonyms                                                                                                                                                                                                                                                                                                          | Attached HMDB_ID | Attached KEGG_ID | Class                       |
|------------|-----------------------------|----------------------------------------------------------------------------------------------------------------------------------------------------------------------------------------------------------------------------------------------------------------------------------------------------------------------------|------------------|------------------|-----------------------------|
| Ac-Orn     | Acetylorithine              | (2S)-2-acetamido-5-a                                                                                                                                                                                                                                                                                                       | HMDB03357        | C00437           | Amino Acids and Derivatives |
|            |                             | dimethylamino-methylidene)amino-pentanoate, 2-Amino-5-(amino-dimethylamino-methylidene)amino-pentanoic acid, ADMA, Asymmetric dimethylarginine, Dimethyl-L-arginine, N(Omega), N(omega)-dimethyl-L-arginine, NG, NG-Dimethyl-L-arginine, NG, NG-dimethylarginine, NG-dimethylarginine, Nomega, Nomega'-Dimethyl-L-arginine |                  |                  |                             |
|            | Asymmetric dimethylarginine | 2-Amino-5-(amino-dimethylamino-methylidene)amino-pentanoate, 2-Amino-5-(amino-dimethylamino-methylidene)amino-pentanoic acid, ADMA, Asymmetric dimethylarginine, Dimethyl-L-arginine, N(Omega),                                                                                                                            | HMDB01539        | C03626           | Amino Acids and Derivatives |
| ADMA       | Asymmetric dimethylarginine | N(omega)-dimethyl-L-                                                                                                                                                                                                                                                                                                       | HMDB01539        | C03626           | Amino Acids and Derivatives |

Supplement table 1

|     |              |                                                                                                                                                                                                                                                                                                                                                                                                                                                                                                                               |           |        |                             |
|-----|--------------|-------------------------------------------------------------------------------------------------------------------------------------------------------------------------------------------------------------------------------------------------------------------------------------------------------------------------------------------------------------------------------------------------------------------------------------------------------------------------------------------------------------------------------|-----------|--------|-----------------------------|
| Ala |              | Carboxyethylamine,<br>3-Amino-Propanoate,<br>3-Amino-Propanoic<br>acid, 3-<br>Aminopropanoate, 3-<br>Aminopropanoic<br>acid, 3-<br>Aminopropionate, 3-<br>Aminopropionic acid,<br>Abufene, B-Alanine,<br>b-Aminopropanoate,<br>b-Aminopropanoic<br>acid, b-<br>Aminopropionate, b-<br>Aminopropionic acid,<br>beta Alanine, beta-<br>Alanine, beta-<br>Aminopropanoate,<br>beta-Aminopropanoic<br>acid, beta-<br>Aminopropionate,<br>beta-Aminopropionic<br>acid, Omega-<br>Aminopropionate,<br>Omega-<br>Aminopropionic acid |           |        |                             |
|     | beta-Alanine | (2S)-2-<br>Aminopropanoate,                                                                                                                                                                                                                                                                                                                                                                                                                                                                                                   | HMDB00056 | C00099 | Amino Acids and Derivatives |
|     | L-Alanine    | (2S)-2-<br>Aminopropanoic                                                                                                                                                                                                                                                                                                                                                                                                                                                                                                     | HMDB00161 | C00041 | Amino Acids and Derivatives |
|     | D-Alanine    | acid, (S)-(+)-Alanine,                                                                                                                                                                                                                                                                                                                                                                                                                                                                                                        | HMDB01310 | C00133 | Amino Acids and Derivatives |
|     | beta-Alanine | (S)-2-amino-                                                                                                                                                                                                                                                                                                                                                                                                                                                                                                                  | HMDB00056 | C00099 | Amino Acids and Derivatives |
|     | L-Alanine    |                                                                                                                                                                                                                                                                                                                                                                                                                                                                                                                               | HMDB00161 | C00041 | Amino Acids and Derivatives |
|     | D-Alanine    |                                                                                                                                                                                                                                                                                                                                                                                                                                                                                                                               | HMDB01310 | C00133 | Amino Acids and Derivatives |

Supplement table 1

|           |                                              |                                                                                                                                                                                                                                                                                                                                                                                                                                                                                                                         |                        |                  |                                                            |
|-----------|----------------------------------------------|-------------------------------------------------------------------------------------------------------------------------------------------------------------------------------------------------------------------------------------------------------------------------------------------------------------------------------------------------------------------------------------------------------------------------------------------------------------------------------------------------------------------------|------------------------|------------------|------------------------------------------------------------|
|           |                                              | (+/-)-2-Aminoadipic acid, 2-Aminoadipate, 2-Aminoadipic acid, a-Aminoadipate, a-Aminoadipic acid, alpha-Amino-adipic acid, alpha-Aminoadipate, alpha-Aminoadipic acid, Aminoadipate, DL-2-Aminoadipate, DL-2-Aminoadipic acid, DL-2-Aminohexanedioate, DL-2-Aminohexanedioic acid, DL-a-Aminoadipate, DL-a-Aminoadipic acid, DL-alpha-Aminoadipate, DL-alpha-Aminoadipic acid, L-2-Aminoadipate, L-2-Aminoadipic acid, L-2-Aminohexanedioate, L-2-Aminohexanedioic acid, L-alpha-Aminoadipate, L-alpha-Aminoadipic acid |                        |                  |                                                            |
| alpha-AAA | L-2-Aminoadipic acid<br>L-2-Aminoadipic acid | Aminoadipate, L-alpha-Aminoadipic                                                                                                                                                                                                                                                                                                                                                                                                                                                                                       | HMDB00510<br>HMDB00510 | C00956<br>C00956 | Amino Acids and Derivatives<br>Amino Acids and Derivatives |

Supplement table 1

|     |                                                      |                                                                                                                                                                                                                                                                                                                                                                                                                                                                                                                                                                                                                 |                                                  |                                      |                                                                                                                          |
|-----|------------------------------------------------------|-----------------------------------------------------------------------------------------------------------------------------------------------------------------------------------------------------------------------------------------------------------------------------------------------------------------------------------------------------------------------------------------------------------------------------------------------------------------------------------------------------------------------------------------------------------------------------------------------------------------|--------------------------------------------------|--------------------------------------|--------------------------------------------------------------------------------------------------------------------------|
| Arg | L-Arginine<br>D-Arginine<br>L-Arginine<br>D-Arginine | [[aminoiminomethyl) amino]-Pentanoate, (S)-2-amino-5-[[aminoiminomethyl) amino]-Pentanoic acid, (S)-2-Amino-5-[[aminoiminomethyl) amino]pentanoate, (S)-2-Amino-5-[[aminoiminomethyl) amino]pentanoic acid, 2-Amino-5-guanidinovalerate, 2-Amino-5-guanidinovaleric acid, 5-[[Aminoiminomethyl) amino]-L-Norvaline, Arginine, L-(+)-Arginine, L- $\alpha$ -Amino-D-guanidinovalerate, L- $\alpha$ -Amino-D-guanidinovaleric acid, L- $\alpha$ -Amino- $\delta$ - $\delta$ -guanidinovalerate, L- $\alpha$ -Amino- $\delta$ - $\delta$ -guanidinovaleric acid, N5-(aminoiminomethyl)-L-Ornithine<br>D-2-Amino-5- | HMDB00517<br>HMDB03416<br>HMDB00517<br>HMDB03416 | C00062<br>C00792<br>C00062<br>C00792 | Amino Acids and Derivatives<br>Amino Acids and Derivatives<br>Amino Acids and Derivatives<br>Amino Acids and Derivatives |
|-----|------------------------------------------------------|-----------------------------------------------------------------------------------------------------------------------------------------------------------------------------------------------------------------------------------------------------------------------------------------------------------------------------------------------------------------------------------------------------------------------------------------------------------------------------------------------------------------------------------------------------------------------------------------------------------------|--------------------------------------------------|--------------------------------------|--------------------------------------------------------------------------------------------------------------------------|

Supplement table 1

|     |                                         |                                             |        |                             |  |
|-----|-----------------------------------------|---------------------------------------------|--------|-----------------------------|--|
| Asn |                                         | 4-Diamino-4-oxobutanoate, (S)-2,            |        |                             |  |
|     |                                         | 4-Diamino-4-oxobutanoic acid, (S)-          |        |                             |  |
|     |                                         | Asparagine, 2-Aminosuccinamate,             |        |                             |  |
|     |                                         | 2-Aminosuccinamic acid, a-Aminosuccinamate, |        |                             |  |
|     | a-Aminosuccinamic acid, Agedoite, alpha |                                             |        |                             |  |
|     | Amminosuccinamate, alpha                |                                             |        |                             |  |
|     | Amminosuccinamic acid, alpha-           |                                             |        |                             |  |
|     | Aminosuccinamate, alpha-                |                                             |        |                             |  |
|     | Aminosuccinamic acid, Altheine, Asn,    |                                             |        |                             |  |
|     | Asparagine, Asparagine acid,            |                                             |        |                             |  |
|     | Asparamide, Aspartamate,                |                                             |        |                             |  |
|     | Aspartamic acid, Aspartic acid amide,   |                                             |        |                             |  |
|     | Aspartic acid b-amide, Aspartic acid    |                                             |        |                             |  |
|     | beta amide, B2, 4-(S)-                  |                                             |        |                             |  |
|     | diamino-4-oxo-                          | HMDB00168                                   | C00152 | Amino Acids and Derivatives |  |
|     | D-Asparagine                            | HMDB33780                                   | C01905 | Amino Acids and Derivatives |  |
|     | L-Asparagine                            | HMDB00168                                   | C00152 | Amino Acids and Derivatives |  |
|     | D-Asparagine                            | HMDB33780                                   | C01905 | Amino Acids and Derivatives |  |
|     |                                         | utanoate, B2, 4-(S)-                        |        |                             |  |
|     |                                         | diamino-4-oxo-                              |        |                             |  |
|     |                                         | utanoic acid, Crystal                       |        |                             |  |

Supplement table 1

|     |                                                                          |                                                                                                                                                                                                                                                                                                                                                                                                                                                                                                                                                                                                                                                               |                                                  |                                      |                                                                                                                          |
|-----|--------------------------------------------------------------------------|---------------------------------------------------------------------------------------------------------------------------------------------------------------------------------------------------------------------------------------------------------------------------------------------------------------------------------------------------------------------------------------------------------------------------------------------------------------------------------------------------------------------------------------------------------------------------------------------------------------------------------------------------------------|--------------------------------------------------|--------------------------------------|--------------------------------------------------------------------------------------------------------------------------|
| Asp | L-Aspartic acid<br>D-Aspartic acid<br>L-Aspartic acid<br>D-Aspartic acid | (+)-Aspartic acid,<br>(2S)-Aspartate, (2S)-<br>Aspartic acid, (L)-<br>Aspartate, (L)-<br>Aspartic acid, (R)-2-<br>aminosuccinate, (S)-<br>(+)-Aspartate, (S)-(+)-<br>Aspartic acid, (S)-2-<br>aminosuccinate, (S)-<br>2-aminosuccinic<br>acid, (S)-amino-<br>Butanedioate, (S)-<br>amino-Butanedioic<br>acid, (S)-<br>Aminobutanedioate,<br>(S)-<br>Aminobutanedioic<br>acid, (S)-Aspartate,<br>(S)-Aspartic acid, 2-<br>Amino-3-<br>methylsuccinate, 2-<br>Amino-3-<br>methylsuccinic acid,<br>2-Aminosuccinate, 2-<br>Aminosuccinic acid,<br>alpha-<br>Aminosuccinate,<br>alpha-Aminosuccinic<br>acid,<br>Aminosuccinate,<br>Asparagate,<br>Asparagic acid, | HMDB00191<br>HMDB06483<br>HMDB00191<br>HMDB06483 | C00049<br>C00402<br>C00049<br>C00402 | Amino Acids and Derivatives<br>Amino Acids and Derivatives<br>Amino Acids and Derivatives<br>Amino Acids and Derivatives |
|-----|--------------------------------------------------------------------------|---------------------------------------------------------------------------------------------------------------------------------------------------------------------------------------------------------------------------------------------------------------------------------------------------------------------------------------------------------------------------------------------------------------------------------------------------------------------------------------------------------------------------------------------------------------------------------------------------------------------------------------------------------------|--------------------------------------------------|--------------------------------------|--------------------------------------------------------------------------------------------------------------------------|

Supplement table 1

|    |                            |                                                                                                                                                                                                                                                                                                                                                                                                                                                                                                                                                                                 |                        |                  |                            |
|----|----------------------------|---------------------------------------------------------------------------------------------------------------------------------------------------------------------------------------------------------------------------------------------------------------------------------------------------------------------------------------------------------------------------------------------------------------------------------------------------------------------------------------------------------------------------------------------------------------------------------|------------------------|------------------|----------------------------|
| C0 | L-Carnitine<br>D-Carnitine | (trimethylammonio)butyrate, (-)-carnitine, (R)-(3-Carboxy-2-hydroxypropyl)trimethylammonium hydroxide, (R)-carnitine, (S)-carnitine, 1-Carnitine, 3-Carboxy-2-hydroxy-N, N, N-trimethyl-1-propanaminium, 3-Hydroxy-4-trimethylammoniobutanoate, 3-Hydroxy-4-trimethylammoniobutanoic acid, Bicarnesine, Carniking, Carniking 50, Carnilean, Carnipass, Carnipass 20, Carnitene, Carnitine, Carnitor, D-Carnitine, delta-Carnitine, DL-carnitine, gamma-Trimethyl-ammonium-beta-hydroxybutirate, gamma-Trimethyl-beta-hydroxybutyrobetaine, gamma-Trimethyl-hydroxybutyrobetaine | HMDB00062<br>HMDB00062 | C15025<br>C15025 | Alkylamines<br>Alkylamines |
|----|----------------------------|---------------------------------------------------------------------------------------------------------------------------------------------------------------------------------------------------------------------------------------------------------------------------------------------------------------------------------------------------------------------------------------------------------------------------------------------------------------------------------------------------------------------------------------------------------------------------------|------------------------|------------------|----------------------------|



Supplement table 1

|     |                                                                |                                                                                          |                                     |  |                                                             |
|-----|----------------------------------------------------------------|------------------------------------------------------------------------------------------|-------------------------------------|--|-------------------------------------------------------------|
|     |                                                                | Decanoyl-L-carnitine,<br>Decanoylcarnitine<br>Decanoyl-L-carnitine,<br>Decanoylcarnitine | HMDB00651<br>HMDB00651<br>HMDB00651 |  | Fatty Acid Esters<br>Fatty Acid Esters<br>Fatty Acid Esters |
| C10 | Decanoylcarnitine<br>Decanoyl-L-carnitine<br>Decanoylcarnitine | Decanoyl-L-carnitine,<br>Decanoylcarnitine<br>Decanoyl-L-carnitine,<br>Decanoylcarnitine | HMDB00651<br>HMDB00651<br>HMDB00651 |  | Fatty Acid Esters<br>Fatty Acid Esters<br>Fatty Acid Esters |
|     | C10:1                                                          |                                                                                          | HMDB13205                           |  | Fatty Acid Esters                                           |
|     | C10:2                                                          |                                                                                          |                                     |  |                                                             |

Supplement table 1

|        |                                                                          |                                                                                                                                                                                                                                                                                                                                                                                                                                                                                                                                                                                           |                                     |  |                                                                            |
|--------|--------------------------------------------------------------------------|-------------------------------------------------------------------------------------------------------------------------------------------------------------------------------------------------------------------------------------------------------------------------------------------------------------------------------------------------------------------------------------------------------------------------------------------------------------------------------------------------------------------------------------------------------------------------------------------|-------------------------------------|--|----------------------------------------------------------------------------|
|        |                                                                          | (-)-Lauroylcarnitine,<br>(R)-<br>Dodecanoylcarnitine,<br>Dodecanoyl-L-<br>carnitine, L-Carnitine<br>dodecanoyl ester,<br>Lauroyl-L(-)-carnitin,<br>Lauroyl-L-carnitine,<br>Lauroylcarnitine<br>(-)-Lauroylcarnitine,<br>(R)-<br>Dodecanoylcarnitine,<br>Dodecanoyl-L-<br>carnitine, L-Carnitine<br>dodecanoyl ester,<br>Lauroyl-L(-)-carnitin,<br>Lauroyl-L-carnitine,<br>Lauroylcarnitine<br>(-)-Lauroylcarnitine,<br>(R)-<br>Dodecanoylcarnitine,<br>Dodecanoyl-L-<br>carnitine, L-Carnitine<br>dodecanoyl ester,<br>Lauroyl-L(-)-carnitin,<br>Lauroyl-L-carnitine,<br>Lauroylcarnitine |                                     |  |                                                                            |
| C12    | Dodecanoylcarnitine<br>Dodecanoyl-L-<br>carnitine<br>Dodecanoylcarnitine | dodecanoyl ester,<br>Lauroyl-L(-)-carnitin,<br>Lauroyl-L-carnitine,<br>Lauroylcarnitine                                                                                                                                                                                                                                                                                                                                                                                                                                                                                                   | HMDB02250<br>HMDB02250<br>HMDB02250 |  | Fatty Acid Esters<br>Fatty Acid Esters<br>Fatty Acid Esters                |
| C12-DC | Dodecanedioylcarniti<br>ne<br>Dodecanedioylcarniti<br>ne                 | Dodecanedioyl-L-<br>carnitine<br>Dodecanedioyl-L-<br>carnitine                                                                                                                                                                                                                                                                                                                                                                                                                                                                                                                            | HMDB13327<br>HMDB13327              |  | Carboxylic Acids and<br>Derivatives<br>Carboxylic Acids and<br>Derivatives |
| C12:1  | C12:1                                                                    |                                                                                                                                                                                                                                                                                                                                                                                                                                                                                                                                                                                           |                                     |  |                                                                            |

Supplement table 1

|          |                              |                         |           |  |                               |
|----------|------------------------------|-------------------------|-----------|--|-------------------------------|
| C14      | C14                          | (-)-Myristoylcarnitine, | HMDB05066 |  | Fatty Acid Esters             |
|          | cis-5-Tetradecenoylcarnitine |                         |           |  |                               |
| C14:1    | cis-5-Tetradecenoylcarnitine |                         | HMDB02014 |  | Fatty Acid Esters             |
| C14:1-OH | C14:1-OH                     | 3-Hydroxy-5(Z)-tetrad   | HMDB13330 |  | Hydroxy Acids and Derivatives |
| C14:2    | C14:2                        | (3E, 5E)-tetradecadie   | HMDB13331 |  | Fatty Acid Esters             |
| C14:2-OH | C14:2-OH                     |                         |           |  |                               |

Supplement table 1

|        |                                                                                            |                                                                                                                                                                                                                                                                                                                                                                                                                                                                                                                                                                                   |                                                  |                                      |                                                                                  |
|--------|--------------------------------------------------------------------------------------------|-----------------------------------------------------------------------------------------------------------------------------------------------------------------------------------------------------------------------------------------------------------------------------------------------------------------------------------------------------------------------------------------------------------------------------------------------------------------------------------------------------------------------------------------------------------------------------------|--------------------------------------------------|--------------------------------------|----------------------------------------------------------------------------------|
|        |                                                                                            | <p>palmitoylcarnitine, (3S)-3-hexadecanoyloxy-4-(trimethylammonio)butanoate, (3S)-3-hexadecanoyloxy-4-(trimethylammonio)butanoic acid, (3S)-3-palmitoyloxy-4-(trimethylammonio)butanoate, (3S)-3-palmitoyloxy-4-(trimethylammonio)butanoic acid, 3-Carboxy-N, N, N-trimethyl-2-[(1-oxohexadecyl)oxy]-1-Propanaminium, D-Palmitoylcarnitine, Hexadecanoyl-L-carnitine, Hexadecenoyl carnitine, L(-)-Palmitoylcarnitine, L-Carnitine palmitoyl ester, L-Palmitoyl-L-carnitine, Palmitoyl D-carnitine, Palmitoyl(-)-carnitine, Palmitoyl-L-carnitine, Palmitoyl-L-carnitine (+)-</p> |                                                  |                                      |                                                                                  |
| C16    | L-Palmitoylcarnitine<br>D-Palmitoylcarnitine<br>L-Palmitoylcarnitine<br>Palmitoylcarnitine |                                                                                                                                                                                                                                                                                                                                                                                                                                                                                                                                                                                   | HMDB00222<br>HMDB00222<br>HMDB00222<br>HMDB00222 | C02990<br>C02990<br>C02990<br>C02990 | Fatty Acid Esters<br>Fatty Acid Esters<br>Fatty Acid Esters<br>Fatty Acid Esters |
| C16-OH | C16-OH                                                                                     |                                                                                                                                                                                                                                                                                                                                                                                                                                                                                                                                                                                   |                                                  |                                      |                                                                                  |

Supplement table 1

|          |                                 |                                                             |           |  |                               |
|----------|---------------------------------|-------------------------------------------------------------|-----------|--|-------------------------------|
|          |                                 | (2E)-Hexadecenoyl-carnitine, trans-2-Hexadecenoyl-carnitine |           |  |                               |
|          | trans-Hexadec-2-enoyl carnitine | (2E)-Hexadecenoyl-carnitine, trans-2-Hexadecenoyl-carnitine | HMDB06317 |  | Fatty Acid Esters             |
| C16:1    | trans-Hexadec-2-enoyl carnitine |                                                             | HMDB06317 |  | Fatty Acid Esters             |
| C16:1-OH | C16:1-OH                        | 3-Hydroxy-(9Z)-hexadecanoic acid                            | HMDB13333 |  | Hydroxy Acids and Derivatives |
| C16:2    | C16:2                           | (Z, Z)9, 12-hexadecadienoic acid                            | HMDB13334 |  | Fatty Acid Esters             |
| C16:2-OH | C16:2-OH                        | 3-Hydroxy-9(Z), 12(Z)-hexadecadienoic acid                  | HMDB13335 |  | Hydroxy Acids and Derivatives |

Supplement table 1

|     |                                        |                                                                                                                                                                                                                                                                                                                                                                                                                                                                                                                                                                                  |                        |  |                                        |
|-----|----------------------------------------|----------------------------------------------------------------------------------------------------------------------------------------------------------------------------------------------------------------------------------------------------------------------------------------------------------------------------------------------------------------------------------------------------------------------------------------------------------------------------------------------------------------------------------------------------------------------------------|------------------------|--|----------------------------------------|
| C18 | Stearoylcarnitine<br>Stearoylcarnitine | (R)-3-carboxy-N, N, N-trimethyl-2-[(1-oxooctadecyl)oxy]-1-Propanaminium inner salt, (R)-Stearoylcarnitine, Acylcarnitine C18:0, L-(3-Carboxy-2-hydroxypropyl)trimethyl-Ammonium stearate hydroxide inner salt, L-Stearic acid ester with (3-carboxy-2-hydroxypropyl)trimethylammonium hydroxide inner salt, L-Stearoylcarnitine, Octadecanoyl-L-carnitine, Octadecanoylcarnitine, Stearoyl-L-carnitine, Stearoylcarnitine (-)-Stearoylcarnitine, (R)-3-carboxy-N, N, N-trimethyl-2-[(1-oxooctadecyl)oxy]-1-Propanaminium inner salt, (R)-Stearoylcarnitine, Acylcarnitine C18:0, | HMDB00848<br>HMDB00848 |  | Fatty Acid Esters<br>Fatty Acid Esters |
|-----|----------------------------------------|----------------------------------------------------------------------------------------------------------------------------------------------------------------------------------------------------------------------------------------------------------------------------------------------------------------------------------------------------------------------------------------------------------------------------------------------------------------------------------------------------------------------------------------------------------------------------------|------------------------|--|----------------------------------------|

Supplement table 1

|          |                      |                                                                                                  |           |  |                               |
|----------|----------------------|--------------------------------------------------------------------------------------------------|-----------|--|-------------------------------|
|          |                      | (Z)-(+)-3-carboxy-N,<br>N, N-trimethyl-2-((1-<br>oxo-9-<br>octadecenyl)oxy)-1-<br>Propanaminium, | HMDB05065 |  | Fatty Acid Esters             |
|          | Oleoylcarnitine      | Acylcarnitine C18:1,                                                                             | HMDB06464 |  | Fatty Acid Esters             |
|          | Elaidic carnitine    | Oleoyl-L-carnitine,                                                                              | HMDB06464 |  | Fatty Acid Esters             |
| C18:1    | Oleoylcarnitine      | Oleoylcarnitine                                                                                  | HMDB06464 |  | Fatty Acid Esters             |
| C18:1-OH | C18:1-OH             | 3-Hydroxy-11(Z)-octadecenoic acid                                                                | HMDB13339 |  | Hydroxy Acids and Derivatives |
| C18:2    | Linoelaidylcarnitine | Acylcarnitine C18:2                                                                              | HMDB06461 |  | Fatty Acid Esters             |

Supplement table 1

|    |                                       |                                                                                                                                                                                                                                                                                                                                                                                                                                                                                                                                                                                                    |                        |                  |                                        |
|----|---------------------------------------|----------------------------------------------------------------------------------------------------------------------------------------------------------------------------------------------------------------------------------------------------------------------------------------------------------------------------------------------------------------------------------------------------------------------------------------------------------------------------------------------------------------------------------------------------------------------------------------------------|------------------------|------------------|----------------------------------------|
| C2 | Acetyl-L-carnitine<br>Acetylcarnitine | (+-)-Acetylcarnitine, (-)-Acetylcarnitine, (R)-Acetylcarnitine, Acetyl-carnitine , Acetyl-L(-)-carnitine, Acetyl-L-carnitine, Acetylcarnitine, ALCAR, L-Acetylcarnitine, L-Carnitine acetyl ester, L-O-Acetylcarnitine, Levocarnitine acetyl, Nicetile, O-Acetyl-L-carnitine, O-Acetylcarnitine<br>(+-)-Acetylcarnitine, (-)-Acetylcarnitine, (R)-Acetylcarnitine, Acetyl-carnitine , Acetyl-L(-)-carnitine, Acetyl-L-carnitine, Acetylcarnitine, ALCAR, L-Acetylcarnitine, L-Carnitine acetyl ester, L-O-Acetylcarnitine, Levocarnitine acetyl, Nicetile, O-Acetyl-L-carnitine, O-Acetylcarnitine | HMDB00201<br>HMDB00201 | C02571<br>C02571 | Fatty Acid Esters<br>Fatty Acid Esters |
|----|---------------------------------------|----------------------------------------------------------------------------------------------------------------------------------------------------------------------------------------------------------------------------------------------------------------------------------------------------------------------------------------------------------------------------------------------------------------------------------------------------------------------------------------------------------------------------------------------------------------------------------------------------|------------------------|------------------|----------------------------------------|



Supplement table 1

|    |                       |                                                                                                                                                                                                                                                                                                                                                                                                                                                                                                |           |        |                   |
|----|-----------------------|------------------------------------------------------------------------------------------------------------------------------------------------------------------------------------------------------------------------------------------------------------------------------------------------------------------------------------------------------------------------------------------------------------------------------------------------------------------------------------------------|-----------|--------|-------------------|
| C3 |                       | Propionylcarnitine chloride, (3-carboxy-2-hydroxypropyl)trimethyl-hydroxide Ammonium inner salt, 3-Carboxy-N, N, N-trimethyl-2-(1-oxopropoxy)-1-propanaminium inner salt, L-Propionylcarnitine, O-Propanoylcarnitine, O-Propionylcarnitine, Propionyl carnitine, Propionyl-carnitine, Propionyl-L-carnitine (+/-)-Propionylcarnitine chloride, (3-carboxy-2-hydroxypropyl)trimethyl-hydroxide Ammonium inner salt, 3-Carboxy-N, N, N-trimethyl-2-(1-oxopropoxy)-1-propanaminium inner salt, L- |           |        |                   |
|    | Propionylcarnitine    | Propionylcarnitine, O-                                                                                                                                                                                                                                                                                                                                                                                                                                                                         | HMDB00824 | C03017 | Fatty Acid Esters |
|    | Propionyl-L-carnitine | Propanoylcarnitine,                                                                                                                                                                                                                                                                                                                                                                                                                                                                            | HMDB00824 | C03017 | Fatty Acid Esters |
|    | Propionylcarnitine    | O-Propionylcarnitine,                                                                                                                                                                                                                                                                                                                                                                                                                                                                          | HMDB00824 | C03017 | Fatty Acid Esters |

Supplement table 1

|               |                           |                                                                                                                                                                                          |           |                   |
|---------------|---------------------------|------------------------------------------------------------------------------------------------------------------------------------------------------------------------------------------|-----------|-------------------|
|               |                           | Carboxyacetyl)oxy]-4-hydroxy-N, N, N-trimethyl-4-oxo-1-Butanaminium inner salt, 3-Carboxy-2-[(carboxyacetyl)oxy]-N, N, N-trimethyl-1-Propanaminium inner salt, Malonyl-L-carnitine       |           |                   |
|               |                           | 2-[(2-Carboxyacetyl)oxy]-4-hydroxy-N, N, N-trimethyl-4-oxo-1-Butanaminium inner salt, 3-Carboxy-2-[(carboxyacetyl)oxy]-N, N, N-trimethyl-1-Propanaminium inner salt, Malonyl-L-carnitine |           |                   |
|               | Malonylcarnitine          | 2-[(2-Carboxyacetyl)oxy]-4-hydroxy-N, N, N-trimethyl-4-oxo-1-Butanaminium inner salt, 3-Carboxy-2-[(carboxyacetyl)oxy]-N, N, N-trimethyl-1-Propanaminium inner salt, Malonyl-L-carnitine | HMDB02095 | Fatty Acid Esters |
|               | Hydroxybutyrylcarnitine   | 2-[(2-Carboxyacetyl)oxy]-4-hydroxy-N, N, N-trimethyl-4-oxo-1-Butanaminium inner salt, 3-Carboxy-2-[(carboxyacetyl)oxy]-N, N, N-trimethyl-1-Propanaminium inner salt, Malonyl-L-carnitine | HMDB13127 | Fatty Acid Esters |
|               | Malonyl-D-carnitine       | 2-[(2-Carboxyacetyl)oxy]-4-hydroxy-N, N, N-trimethyl-4-oxo-1-Butanaminium inner salt, 3-Carboxy-2-[(carboxyacetyl)oxy]-N, N, N-trimethyl-1-Propanaminium inner salt, Malonyl-L-carnitine | HMDB02095 | Fatty Acid Esters |
|               | Malonyl-L-carnitine       | 2-[(2-Carboxyacetyl)oxy]-4-hydroxy-N, N, N-trimethyl-4-oxo-1-Butanaminium inner salt, 3-Carboxy-2-[(carboxyacetyl)oxy]-N, N, N-trimethyl-1-Propanaminium inner salt, Malonyl-L-carnitine | HMDB02095 | Fatty Acid Esters |
|               | Malonylcarnitine          | 2-[(2-Carboxyacetyl)oxy]-4-hydroxy-N, N, N-trimethyl-4-oxo-1-Butanaminium inner salt, 3-Carboxy-2-[(carboxyacetyl)oxy]-N, N, N-trimethyl-1-Propanaminium inner salt, Malonyl-L-carnitine | HMDB02095 | Fatty Acid Esters |
|               | Hydroxybutyrylcarnitine   | 2-[(2-Carboxyacetyl)oxy]-4-hydroxy-N, N, N-trimethyl-4-oxo-1-Butanaminium inner salt, 3-Carboxy-2-[(carboxyacetyl)oxy]-N, N, N-trimethyl-1-Propanaminium inner salt, Malonyl-L-carnitine | HMDB02095 | Fatty Acid Esters |
| C3-DC (C4-OH) |                           | 2-[(2-Carboxyacetyl)oxy]-4-hydroxy-N, N, N-trimethyl-4-oxo-1-Butanaminium inner salt, 3-Carboxy-2-[(carboxyacetyl)oxy]-N, N, N-trimethyl-1-Propanaminium inner salt, Malonyl-L-carnitine | HMDB13127 | Fatty Acid Esters |
| C3-OH         | Hydroxypropionylcarnitine | Hydroxypropionyl-L-carnitine                                                                                                                                                             | HMDB13125 | Fatty Acid Esters |
| C3:1          | C3:1                      | Propenoyl-L-carnitine                                                                                                                                                                    | HMDB13124 | Fatty Acid Esters |

Supplement table 1

|      |                                                                                                                                        |                                                                                                                                                                                                                                                                                                                                                                                                                                                                                                   |                                                                            |                  |                                                                                                                            |
|------|----------------------------------------------------------------------------------------------------------------------------------------|---------------------------------------------------------------------------------------------------------------------------------------------------------------------------------------------------------------------------------------------------------------------------------------------------------------------------------------------------------------------------------------------------------------------------------------------------------------------------------------------------|----------------------------------------------------------------------------|------------------|----------------------------------------------------------------------------------------------------------------------------|
|      |                                                                                                                                        | carnitine, Isobutyryl-L-carnitine, L-Isobutyric acid ester with (3-carboxy-2-hydroxypropyl)trimethylammonium hydroxide inner salt (3-carboxy-2-hydroxypropyl)trimethyl-L-butyrate, (R)-3-carboxy-N, N, N-trimethyl-2-(1-oxobutoxy)-1-Propanaminium, Butyryl-L-carnitine, Ester with (3-carboxy-2-hydroxypropyl)trimethylammonium L-Butyric acid, Ester with L-(3-carboxy-2-hydroxypropyl)trimethylammonium Butyric acid, L-Carnitine butyryl ester, N-Butyryl-L(-)-carnitine, O-Butanoylcarnitine | HMDB00736<br>HMDB02013<br>HMDB00736<br>HMDB00736<br>HMDB02013<br>HMDB02013 | C02862           | Fatty Acid Esters<br>Fatty Acid Esters<br>Fatty Acid Esters<br>Fatty Acid Esters<br>Fatty Acid Esters<br>Fatty Acid Esters |
| C4   | Isobutyryl-L-carnitine<br>Butyrylcarnitine<br>Isobutyryl-L-carnitine<br>Isobutyrylcarnitine<br>Butyryl-L-carnitine<br>Butyrylcarnitine | Isobutyryl-L(-)-carnitine, Isobutyryl-L-carnitine, L-Isobutyric acid ester with (3-                                                                                                                                                                                                                                                                                                                                                                                                               | HMDB02013<br>HMDB02013                                                     | C02862<br>C02862 | Fatty Acid Esters<br>Fatty Acid Esters                                                                                     |
| C4:1 | Butenyl-L-carnitine                                                                                                                    | Butenyl-L-carnitine                                                                                                                                                                                                                                                                                                                                                                                                                                                                               | HMDB13126                                                                  |                  | Fatty Acid Esters                                                                                                          |

Supplement table 1

|                 |                                  |                                                                                                                                                                                                                  |           |  |                   |
|-----------------|----------------------------------|------------------------------------------------------------------------------------------------------------------------------------------------------------------------------------------------------------------|-----------|--|-------------------|
|                 |                                  | Isovaleryl L-carnitine,<br>Isovalerylcarnitine<br>Pentanoylcarnitine,<br>Valeryl-L-carnitine                                                                                                                     |           |  |                   |
|                 |                                  | (2-<br>methylbutyryl)carnitin<br>e, 2-<br>Methylbutyroylcarniti<br>ne, L-2-<br>Methylbutyrate (3-<br>carboxy-2-<br>hydroxypropyl)trimet<br>hyl-hydroxide<br>Ammonium inner<br>salt, Methylbutyroyl-<br>carnitine |           |  |                   |
|                 | Isovalerylcarnitine              | Isovaleryl L-carnitine,                                                                                                                                                                                          | HMDB00688 |  | Fatty Acid Esters |
|                 | Valerylcarnitine                 | Isovalerylcarnitine                                                                                                                                                                                              | HMDB13128 |  | Fatty Acid Esters |
|                 | Pivaloylcarnitine                | Isovaleryl L-carnitine,                                                                                                                                                                                          | HMDB41993 |  | Fatty Acid Esters |
|                 | 2-<br>Methylbutyrylcarnitin<br>e | Isovalerylcarnitine                                                                                                                                                                                              | HMDB00378 |  | Fatty Acid Esters |
|                 | Isovalery-L-carnitine            | Pentanoylcarnitine,                                                                                                                                                                                              | HMDB00688 |  | Fatty Acid Esters |
|                 | Isovalerylcarnitine              | Valeryl-L-carnitine                                                                                                                                                                                              | HMDB00688 |  | Fatty Acid Esters |
|                 | Valeryl-L-carnitine              | Pentanoylcarnitine,                                                                                                                                                                                              | HMDB13128 |  | Fatty Acid Esters |
| C5              | Valerylcarnitine                 | Valeryl-L-carnitine                                                                                                                                                                                              | HMDB13128 |  | Fatty Acid Esters |
| C5-DC (C6-OH)   | C5-DC (C6-OH)                    |                                                                                                                                                                                                                  | HMDB13130 |  | Fatty Acid Esters |
| C5-M-DC         | Methylglutaryl-L-carni           | 3-Methylglutaryl-carniti                                                                                                                                                                                         | HMDB00552 |  | Fatty Acid Esters |
| C5-OH (C3-DC-M) | C5-OH (C3-DC-M)                  |                                                                                                                                                                                                                  | HMDB13132 |  | Alkylamines       |
|                 | Tiglylcarnitine                  | Tiglyl-L-carnitine                                                                                                                                                                                               | HMDB02366 |  | Fatty Acid Esters |
| C5:1            | Tiglylcarnitine                  | Tiglyl-L-carnitine                                                                                                                                                                                               | HMDB02366 |  | Fatty Acid Esters |
| C5:1-DC         | Glutaconylcarnitine              | Glutaconyl-L-carnitine                                                                                                                                                                                           | HMDB13129 |  | Fatty Acid Esters |

Supplement table 1

|              |                                                                                                                                    |                                                                                                                                                                                                                                                                                                                                                                                                                                                                                                                                                                                                                                                                                        |                                                  |  |                                                                                  |
|--------------|------------------------------------------------------------------------------------------------------------------------------------|----------------------------------------------------------------------------------------------------------------------------------------------------------------------------------------------------------------------------------------------------------------------------------------------------------------------------------------------------------------------------------------------------------------------------------------------------------------------------------------------------------------------------------------------------------------------------------------------------------------------------------------------------------------------------------------|--------------------------------------------------|--|----------------------------------------------------------------------------------|
|              |                                                                                                                                    | Hexanoate,<br>Hexanoic acid,<br>Hexanoic acid ester<br>with (3-carboxy-2-<br>hydroxypropyl)trimet<br>hylammonium<br>hydroxide inner salt,<br>Hexanoyl DL-<br>carnitine, Hexanoyl-<br>D, L-carnitine,<br>Hexanoylcarnitine<br>(R)-3-carboxy-N, N,<br>N-trimethyl-2-[(1-<br>oxohexyl)oxy]-1-<br>Propanaminium inner<br>salt, (R)-<br>Caproylcarnitine,<br>Hexanoate,<br>Hexanoic acid,<br>Hexanoic acid ester<br>with L-(3-carboxy-2-<br>hydroxypropyl)trimet<br>hylammonium<br>hydroxide inner salt,<br>Hexanoyl-L-carnitine,<br>L-Carnitine hexanoyl<br>ester, L-Hexanoate,<br>L-Hexanoic acid, L-<br>Hexanoic acid ester<br>with (3-carboxy-2-<br>hydroxypropyl)trimet<br>hylammonium |                                                  |  |                                                                                  |
| C6 (C4:1-DC) | Hexanoylcarnitine<br>(Fumaryl carnitine)<br>L-Hexanoylcarnitine<br>Hexanoylcarnitine<br>(Fumaryl carnitine)<br>L-Hexanoylcarnitine | Hexanoic acid ester<br>with L-(3-carboxy-2-<br>hydroxypropyl)trimet<br>hylammonium                                                                                                                                                                                                                                                                                                                                                                                                                                                                                                                                                                                                     | HMDB00705<br>HMDB00756<br>HMDB00705<br>HMDB00756 |  | Fatty Acid Esters<br>Fatty Acid Esters<br>Fatty Acid Esters<br>Fatty Acid Esters |
| C6:1         | C6:1                                                                                                                               | Hexenoyl-L-carnitine                                                                                                                                                                                                                                                                                                                                                                                                                                                                                                                                                                                                                                                                   | HMDB13161                                        |  | Fatty Acid Esters                                                                |
| C7-DC        | Pimelylcarnitine                                                                                                                   | Heptanedioylcarnitine                                                                                                                                                                                                                                                                                                                                                                                                                                                                                                                                                                                                                                                                  | HMDB13328                                        |  | Carboxylic Acids and Derivatives                                                 |

Supplement table 1

|    |                                           |                                                                                                                                                                                                                                                                                                                                                                                                                                                                                                                               |                        |                  |                                        |
|----|-------------------------------------------|-------------------------------------------------------------------------------------------------------------------------------------------------------------------------------------------------------------------------------------------------------------------------------------------------------------------------------------------------------------------------------------------------------------------------------------------------------------------------------------------------------------------------------|------------------------|------------------|----------------------------------------|
|    |                                           | (-)-Octanoylcarnitine, L-Carnitine octanoyl ester, L-O-Octanoylcarnitine, L-Octanoylcarnitine, Octanoate, Octanoic acid, Octanoic acid ester with L-(3-carboxy-2-hydroxypropyl)trimethylammonium hydroxide inner salt, Octanoyl-L-carnitine, Octanoylcarnitine (-)-Octanoylcarnitine, L-Carnitine octanoyl ester, L-O-Octanoylcarnitine, L-Octanoylcarnitine, Octanoate, Octanoic acid, Octanoic acid ester with L-(3-carboxy-2-hydroxypropyl)trimethylammonium hydroxide inner salt, Octanoyl-L-carnitine, Octanoylcarnitine |                        |                  |                                        |
| C8 | Octanoyl-L-carnitine<br>Octanoylcarnitine | Octanoyl-L-carnitine,<br>Octanoylcarnitine                                                                                                                                                                                                                                                                                                                                                                                                                                                                                    | HMDB00791<br>HMDB00791 | C02838<br>C02838 | Fatty Acid Esters<br>Fatty Acid Esters |
| C9 | 2,6 Dimethylheptanoyl                     | 2, 6-Dimethylheptanoyl                                                                                                                                                                                                                                                                                                                                                                                                                                                                                                        | HMDB06320              |                  | Fatty Acid Esters                      |

Supplement table 1

|           |             |                                                                                                                                                                                                                                                                                                                |           |        |                 |
|-----------|-------------|----------------------------------------------------------------------------------------------------------------------------------------------------------------------------------------------------------------------------------------------------------------------------------------------------------------|-----------|--------|-----------------|
|           |             | b-Alanylhistidine,<br>beta-Alanyl-L-<br>histidine, beta-<br>Alanylhistidine,<br>Carnosine, Igotine,<br>Karnozin, Karnozzn,<br>L-Carnosine, N-(3-<br>Aminopropanoyl)histi<br>dine, N-(b-Alanyl)-L-<br>histidine, N-b-Alanyl-<br>L-Histidine, N-beta-<br>Alanyl-L-Histidine,<br>Sevitin                          |           |        |                 |
|           |             | b-Alanyl-L-histidine,<br>b-Alanylhistidine,<br>beta-Alanyl-L-<br>histidine, beta-<br>Alanylhistidine,<br>Carnosine, Igotine,<br>Karnozin, Karnozzn,<br>L-Carnosine, N-(3-<br>Aminopropanoyl)histi<br>dine, N-(b-Alanyl)-L-<br>histidine, N-b-Alanyl-<br>L-Histidine, N-beta-<br>Alanyl-L-Histidine,<br>Sevitin |           |        |                 |
|           | Carnosine   | b-Alanyl-L-histidine,                                                                                                                                                                                                                                                                                          | HMDB00033 | C00386 | Peptidomimetics |
|           | L-Carnosine | b-Alanylhistidine,                                                                                                                                                                                                                                                                                             | HMDB00033 | C00386 | Peptidomimetics |
|           | Carnosine   | beta-Alanyl-L-                                                                                                                                                                                                                                                                                                 | HMDB00033 | C00386 | Peptidomimetics |
|           | L-Carnosine | histidine, beta-                                                                                                                                                                                                                                                                                               | HMDB00033 | C00386 | Peptidomimetics |
| Carnosine | L-Carnosine | Alanylhistidine,                                                                                                                                                                                                                                                                                               | HMDB00033 | C00386 | Peptidomimetics |

Supplement table 1

|     |                                            |                       |                                     |                            |                                                                                           |
|-----|--------------------------------------------|-----------------------|-------------------------------------|----------------------------|-------------------------------------------------------------------------------------------|
|     | Citrulline<br>L-Citrulline<br>L-Citrulline | (2S)-2-amino-5-(carba | HMDB00904<br>HMDB00904<br>HMDB00904 | C00327<br>C00327<br>C00327 | Amino Acids and Derivatives<br>Amino Acids and Derivatives<br>Amino Acids and Derivatives |
| Cit |                                            |                       |                                     |                            |                                                                                           |



Supplement table 1

|            |            |                                                                                                                                                                  |           |        |         |
|------------|------------|------------------------------------------------------------------------------------------------------------------------------------------------------------------|-----------|--------|---------|
|            |            | 1-Methylglycocyanamide, 1-Methylhydantoin-2-imide, 2-Amino-1-methyl-1, 5-dihydroimidazol-4-one, 2-Amino-1-methylimidazolin-4-one, Creatine anhydride, Creatinine |           |        |         |
|            |            | 1-Methylglycocyanamide, 1-Methylhydantoin-2-imide, 2-Amino-1-methyl-1, 5-dihydroimidazol-4-one, 2-Amino-1-methylimidazolin-4-one, Creatine anhydride, Creatinine |           |        |         |
|            |            | 1-Methylglycocyanamide, 1-Methylhydantoin-2-imide, 2-Amino-1-methyl-1, 5-dihydroimidazol-4-one, 2-Amino-1-methylimidazolin-4-one, Creatine anhydride, Creatinine | HMDB00562 | C00791 | Lactams |
| Creatinine | Creatinine | one, Creatine anhydride, Creatinine                                                                                                                              | HMDB00562 | C00791 | Lactams |
|            | Creatinine | one, Creatine anhydride, Creatinine                                                                                                                              | HMDB00562 | C00791 | Lactams |

Supplement table 1

|      |                                                    |                              |                        |                  |                                                            |
|------|----------------------------------------------------|------------------------------|------------------------|------------------|------------------------------------------------------------|
| DOPA | L-Dihydroxyphenylalanine<br>Dihydroxyphenylalanine | (-)-3-(3, 4-dihydroxyphenyl) | HMDB00181<br>HMDB00609 | C00355<br>C00355 | Amino Acids and Derivatives<br>Amino Acids and Derivatives |
|------|----------------------------------------------------|------------------------------|------------------------|------------------|------------------------------------------------------------|

Supplement table 1

|          |                                  |                                                                                                                                                                                                                                                                                                                                                                                                                                                                                                                           |                                     |                            |                                                                               |
|----------|----------------------------------|---------------------------------------------------------------------------------------------------------------------------------------------------------------------------------------------------------------------------------------------------------------------------------------------------------------------------------------------------------------------------------------------------------------------------------------------------------------------------------------------------------------------------|-------------------------------------|----------------------------|-------------------------------------------------------------------------------|
|          |                                  | Dihydroxyphenyl)ethylamine, 3, 4-<br>Dihydroxyphenethylamine, 3, 4-<br>Dihydroxyphenylethylamine, 3-<br>Hydroxytyramine, 4-(2-Aminoethyl)-1, 2-benzenediol, 4-(2-Aminoethyl)-<br>Pyrocatechol, 4-(2-Aminoethyl)catechol, 4-(2-Aminoethyl)pyrocatechol, a-(3, 4-Dihydroxyphenyl)-b-aminoethane, alpha-(3, 4-Dihydroxyphenyl)-beta-aminoethane,<br>Deoxyepinephrine,<br>Dopamin, Dopamine,<br>Dopaminum,<br>Dopastat,<br>Dophamine, Dynatra,<br>Hydroxytyramin,<br>Hydroxytyramine,<br>Intropin,<br>Oxytyramine,<br>Revivan | HMDB00073<br>HMDB00073<br>HMDB00073 | C03758<br>C03758<br>C03758 | Phenols and Derivatives<br>Phenols and Derivatives<br>Phenols and Derivatives |
| Dopamine | Dopamine<br>Dopamine<br>Dopamine |                                                                                                                                                                                                                                                                                                                                                                                                                                                                                                                           |                                     |                            |                                                                               |

Supplement table 1

|     |             |                                                                                                                                                                                                                                                                                                                                                                                                                                                                                                                                                           |           |        |                             |
|-----|-------------|-----------------------------------------------------------------------------------------------------------------------------------------------------------------------------------------------------------------------------------------------------------------------------------------------------------------------------------------------------------------------------------------------------------------------------------------------------------------------------------------------------------------------------------------------------------|-----------|--------|-----------------------------|
| Gln |             | oxopentanoate, (2S)-2, 5-diamino-5-oxopentanoic acid, (2S)-2-amino-4-carbamoylbutanoate, (2S)-2-amino-4-carbamoylbutanoic acid, (S)-2, 5-Diamino-5-oxopentanoate, (S)-2, 5-Diamino-5-oxopentanoic acid, 2-Aminoglutaramic acid, Cebrogen, gamma-Glutamine, Glavamin, Glumin, Glutamic acid 5-amide, Glutamic acid amide, Glutamine, L-(+)-Glutamine, L-2-Aminoglutaramic acid, L-2-Aminoglutaramidic acid, L-Glutamic acid 5-amide, L-Glutamic acid gamma-amide, L-Glutamid, L-Glutamide, L-Glutamin, L-Glutamine, L-Glutaminsaeure-5-amid, Levoglutamid, | HMDB00641 | C00064 | Amino Acids and Derivatives |
|     | L-Glutamine |                                                                                                                                                                                                                                                                                                                                                                                                                                                                                                                                                           | HMDB03423 | C00819 | Amino Acids and Derivatives |
|     | D-Glutamine |                                                                                                                                                                                                                                                                                                                                                                                                                                                                                                                                                           | HMDB00641 | C00064 | Amino Acids and Derivatives |
|     | D-Glutamine |                                                                                                                                                                                                                                                                                                                                                                                                                                                                                                                                                           | HMDB03423 | C00819 | Amino Acids and Derivatives |

Supplement table 1

|     |                 |                                  |           |        |                             |
|-----|-----------------|----------------------------------|-----------|--------|-----------------------------|
| Glu |                 | Aminopentanedioate, (2S)-2-      |           |        |                             |
|     |                 | Aminopentanedioic acid, (S)-(+)- |           |        |                             |
|     |                 | Glutamate, (S)-(+)-              |           |        |                             |
|     |                 | Glutamic acid, (S)-2-            |           |        |                             |
|     |                 | Aminopentanedioate, (S)-2-       |           |        |                             |
|     |                 | Aminopentanedioic acid, (S)-     |           |        |                             |
|     |                 | Glutamate, (S)-                  |           |        |                             |
|     |                 | Glutamic acid, 1-                |           |        |                             |
|     |                 | Amino-propane-1, 3-              |           |        |                             |
|     |                 | dicarboxylate, 1-                |           |        |                             |
|     |                 | Amino-propane-1, 3-              |           |        |                             |
|     |                 | dicarboxylic acid, 1-            |           |        |                             |
|     |                 | Aminopropane-1, 3-               |           |        |                             |
|     |                 | dicarboxylate, 1-                |           |        |                             |
|     |                 | Aminopropane-1, 3-               |           |        |                             |
|     |                 | dicarboxylic acid, 2-            |           |        |                             |
|     |                 | Aminoglutarate, 2-               |           |        |                             |
|     |                 | Aminoglutamic acid, 2-           |           |        |                             |
|     |                 | Aminopentanedioate, 2-           |           |        |                             |
|     |                 | Aminopentanedioic acid, a-       |           |        |                             |
|     |                 | Aminoglutarate, a-               |           |        |                             |
|     |                 | Aminoglutamic acid, a-           |           |        |                             |
|     |                 | Glutamate, a-                    |           |        |                             |
|     |                 | Glutamic acid,                   |           |        |                             |
|     | L-Glutamic acid | Aciglut, alpha-                  | HMDB00148 | C00025 | Amino Acids and Derivatives |
|     | D-Glutamic acid | Aminoglutarate,                  | HMDB03339 | C00217 | Amino Acids and Derivatives |
|     | L-Glutamic acid | alpha-Aminoglutamic acid,        | HMDB00148 | C00025 | Amino Acids and Derivatives |
|     | D-Glutamic acid | alpha-                           | HMDB03339 | C00217 | Amino Acids and Derivatives |

Supplement table 1

|     |                    |                                                                                                                                                                                                                                                                                                                                                                                                                                              |                        |                  |                                                            |
|-----|--------------------|----------------------------------------------------------------------------------------------------------------------------------------------------------------------------------------------------------------------------------------------------------------------------------------------------------------------------------------------------------------------------------------------------------------------------------------------|------------------------|------------------|------------------------------------------------------------|
| Gly | Glycine<br>Glycine | 2-Aminoacetate, 2-Aminoacetic acid, Aciport, Amino-Acetate, Amino-Acetic acid, Aminoacetate, Aminoacetic acid, Aminoethanoate, Aminoethanoic acid, Glicoamin, Glycocol, Glycolixir, Glycosthene, Gyn-Hydralin, Padil<br>2-Aminoacetate, 2-Aminoacetic acid, Aciport, Amino-Acetate, Amino-Acetic acid, Aminoacetate, Aminoacetic acid, Aminoethanoate, Aminoethanoic acid, Glicoamin, Glycocol, Glycolixir, Glycosthene, Gyn-Hydralin, Padil | HMDB00123<br>HMDB00123 | C00037<br>C00037 | Amino Acids and Derivatives<br>Amino Acids and Derivatives |
|-----|--------------------|----------------------------------------------------------------------------------------------------------------------------------------------------------------------------------------------------------------------------------------------------------------------------------------------------------------------------------------------------------------------------------------------------------------------------------------------|------------------------|------------------|------------------------------------------------------------|

Supplement table 1

|    |                  |                                                                                                                                                                                                                                                                             |           |        |                 |
|----|------------------|-----------------------------------------------------------------------------------------------------------------------------------------------------------------------------------------------------------------------------------------------------------------------------|-----------|--------|-----------------|
|    |                  | Glucose, Anhydrous dextrose, Cerelose, Cerelose 2001, Clearsweet 95, Clintose L, Corn sugar, CPC hydrate, D(+)-Glucose, Dextropur, Dextrose, Dextrosol, Glucodin, Glucolin, Glucose, Goldsugar, Grape sugar, Meritose, Staleydex 111, Staleydex 95M, Tabfine 097(HS), Vadex |           |        |                 |
|    | D-Glucose        | (+)-Galactose, 5abp,                                                                                                                                                                                                                                                        | HMDB00122 | C00031 | Monosaccharides |
|    | D-Galactose      | 8abp, alpha D-                                                                                                                                                                                                                                                              | HMDB00143 | C00984 | Monosaccharides |
|    | D-Galactose      | Galactose, alpha-D-                                                                                                                                                                                                                                                         | HMDB00143 | C00984 | Monosaccharides |
|    | D-Mannose        | Galactopyranose,                                                                                                                                                                                                                                                            | HMDB00169 | C00159 | Monosaccharides |
|    | Beta-D-Glucose   | alpha-D-Galactose,                                                                                                                                                                                                                                                          | HMDB00516 | C00221 | Monosaccharides |
|    | D-Fructose       | D-(+)-Galactose, D-                                                                                                                                                                                                                                                         | HMDB00660 | C02336 | Monosaccharides |
|    | D-Fructose       | Galactose, D-                                                                                                                                                                                                                                                               | HMDB00660 | C02336 | Monosaccharides |
|    | L-Sorbose        | Hexose, GAL,                                                                                                                                                                                                                                                                | HMDB01266 | C08356 | Monosaccharides |
|    | Alpha-D-Glucose  | Galactose,                                                                                                                                                                                                                                                                  | HMDB03345 | C00267 | Monosaccharides |
|    | D-Tagatose       | Galactose (NF),                                                                                                                                                                                                                                                             | HMDB03418 | C00795 | Monosaccharides |
|    | Beta-D-Galactose | GLA, GLC, Hexose                                                                                                                                                                                                                                                            | HMDB03449 | C00962 | Monosaccharides |
|    | L-Gulose         | (+)-Galactose, 5abp,                                                                                                                                                                                                                                                        | HMDB12326 | C15923 | Monosaccharides |
|    | L-Gulose         | 8abp, alpha D-                                                                                                                                                                                                                                                              | HMDB12326 | C15923 | Monosaccharides |
|    | L-Galactose      | Galactose, alpha-D-                                                                                                                                                                                                                                                         | HMDB33704 | C01825 | Monosaccharides |
|    | D-Glucose        | Galactopyranose,                                                                                                                                                                                                                                                            | HMDB00122 | C00031 | Monosaccharides |
|    | D-Galactose      | alpha-D-Galactose,                                                                                                                                                                                                                                                          | HMDB00143 | C00984 | Monosaccharides |
|    | D-Mannose        | D-(+)-Galactose, D-                                                                                                                                                                                                                                                         | HMDB00169 | C00159 | Monosaccharides |
|    | Beta-D-Glucose   | Galactose, D-                                                                                                                                                                                                                                                               | HMDB00516 | C00221 | Monosaccharides |
|    | D-Fructose       | Hexose, GAL,                                                                                                                                                                                                                                                                | HMDB00660 | C02336 | Monosaccharides |
|    | Alpha-D-Glucose  | Galactose,                                                                                                                                                                                                                                                                  | HMDB03345 | C00267 | Monosaccharides |
|    | D-Tagatose       | Galactose, alpha-D-                                                                                                                                                                                                                                                         | HMDB03418 | C00795 | Monosaccharides |
|    | Beta-D-Galactose | Galactopyranose,                                                                                                                                                                                                                                                            | HMDB03449 | C00962 | Monosaccharides |
| H1 | L-Gulose         | alpha-D-Galactose,                                                                                                                                                                                                                                                          | HMDB12326 | C15923 | Monosaccharides |

Supplement table 1

|     |                            |                                                                                                                                                                                                                                                                                                                                                                                                                                                                                                                                                      |                        |                  |                                                            |
|-----|----------------------------|------------------------------------------------------------------------------------------------------------------------------------------------------------------------------------------------------------------------------------------------------------------------------------------------------------------------------------------------------------------------------------------------------------------------------------------------------------------------------------------------------------------------------------------------------|------------------------|------------------|------------------------------------------------------------|
| His | L-Histidine<br>L-Histidine | alanine, (S)-2-Amino-3-(4-imidazolyl)propionate, (S)-4-(2-Amino-2-carboxyethyl)imidazole, (S)-alpha-Amino-1H-imidazole-4-propanoate, (S)-alpha-Amino-1H-imidazole-4-propanoic acid, (S)-alpha-Amino-1H-imidazole-4-propanoate, (S)-alpha-Amino-1H-imidazole-4-propanoic acid, (S)-alpha-Amino-1H-imidazole-4-propionate, (S)-alpha-Amino-1H-imidazole-4-propionic acid, (S)-Histidine, (S)1H-Imidazole-4-alanine, 3-(1H-Imidazol-4-yl)-L-Alanine, Amino-1H-imidazole-4-propanoate, Amino-1H-imidazole-4-propanoic acid, Amino-4-imidazolepropionate, | HMDB00177<br>HMDB00177 | C00135<br>C00135 | Amino Acids and Derivatives<br>Amino Acids and Derivatives |
|-----|----------------------------|------------------------------------------------------------------------------------------------------------------------------------------------------------------------------------------------------------------------------------------------------------------------------------------------------------------------------------------------------------------------------------------------------------------------------------------------------------------------------------------------------------------------------------------------------|------------------------|------------------|------------------------------------------------------------|



Supplement table 1

|           |           |                                                                                                                                                                                                                                                                                                                                                                                                                                                                                                                     |           |        |        |
|-----------|-----------|---------------------------------------------------------------------------------------------------------------------------------------------------------------------------------------------------------------------------------------------------------------------------------------------------------------------------------------------------------------------------------------------------------------------------------------------------------------------------------------------------------------------|-----------|--------|--------|
|           |           | ethanamine, 2-(1H-Imidazol-4-yl)ethanamine, 2-(1H-Imidazol-4-yl)ethylamine, 2-(1H-Imidazol-5-yl)ethanamine, 2-(1H-Imidazol-5-yl)ethylamine, 2-(4-Imidazolyl)ethanamine, 2-(4-Imidazolyl)ethylamine, 2-Imidazol-4-yl-Ethylamine, 2-Imidazol-4-ylethylamine, 4-(2-Aminoethyl)-1H-imidazole, 4-(2-Aminoethyl)imidazole, 4-Imidazoleethylamine, 5-Imidazoleethylamine, b-Imidazolyl-4-ethylamine, beta-Aminoethylglyoxaline, beta-Aminoethylimidazole, beta-Aminoethylglyoxaline, beta-Imidazolyl-4-ethylamine, Eramin, |           |        |        |
|           | Histamine | Aminothethylglyoxaline, beta-Imidazolyl-4-ethylamine, Eramin,                                                                                                                                                                                                                                                                                                                                                                                                                                                       | HMDB00870 | C00388 | Azoles |
|           | Histamine |                                                                                                                                                                                                                                                                                                                                                                                                                                                                                                                     | HMDB00870 | C00388 | Azoles |
| Histamine | Histamine |                                                                                                                                                                                                                                                                                                                                                                                                                                                                                                                     | HMDB00870 | C00388 | Azoles |

Supplement table 1

|     |                                                   |                      |                                     |                  |                                                                                           |
|-----|---------------------------------------------------|----------------------|-------------------------------------|------------------|-------------------------------------------------------------------------------------------|
| Ile | L-Isoleucine<br>L-Isoleucine<br>Allo-L-Isoleucine | (2S, 3S)-2-amino-3-m | HMDB00172<br>HMDB00172<br>HMDB00557 | C00407<br>C00407 | Amino Acids and Derivatives<br>Amino Acids and Derivatives<br>Amino Acids and Derivatives |
|-----|---------------------------------------------------|----------------------|-------------------------------------|------------------|-------------------------------------------------------------------------------------------|

Supplement table 1

|            |                              |                                                                                                                                                                                                                                                                                                                                                                                                                                                                                                                                                                                                                                                      |                        |                  |                                                            |
|------------|------------------------------|------------------------------------------------------------------------------------------------------------------------------------------------------------------------------------------------------------------------------------------------------------------------------------------------------------------------------------------------------------------------------------------------------------------------------------------------------------------------------------------------------------------------------------------------------------------------------------------------------------------------------------------------------|------------------------|------------------|------------------------------------------------------------|
| Kynurenine | L-Kynurenine<br>L-Kynurenine | diamino-3-hydroxy-<br>gamma-oxo-<br>Benzenebutanoate,<br>(alphaS)-alpha, 2-<br>diamino-3-hydroxy-<br>gamma-oxo-<br>Benzenebutanoic<br>acid, (S)-alpha, 2-<br>diamino-3-hydroxy-<br>gamma-oxo-<br>Benzenebutanoate,<br>(S)-alpha, 2-diamino-<br>3-hydroxy-gamma-<br>oxo-<br>Benzenebutanoic<br>acid, 3-(3-<br>Hydroxyanthraniloyl)-<br>L-alanine, 3-<br>Anthraniloyl-Alanine,<br>3-Anthraniloyl-L-<br>alanine, 3-<br>Anthraniloylalanine, 3-<br>Hydroxy-L-<br>kynurenine, alpha, 2-<br>Diamino-gamma-oxo-<br>Benzenebutanoate,<br>alpha, 2-Diamino-<br>gamma-oxo-<br>Benzenebutanoic<br>acid, DL-Kynurenine,<br>DL-Kynureninefree<br>base, Kynurenin, | HMDB00684<br>HMDB00684 | C00328<br>C00328 | Amino Acids and Derivatives<br>Amino Acids and Derivatives |
|------------|------------------------------|------------------------------------------------------------------------------------------------------------------------------------------------------------------------------------------------------------------------------------------------------------------------------------------------------------------------------------------------------------------------------------------------------------------------------------------------------------------------------------------------------------------------------------------------------------------------------------------------------------------------------------------------------|------------------------|------------------|------------------------------------------------------------|

Supplement table 1

|     |                |                                                                                                                                                                                                                                                                                                                                                                                            |           |        |                             |
|-----|----------------|--------------------------------------------------------------------------------------------------------------------------------------------------------------------------------------------------------------------------------------------------------------------------------------------------------------------------------------------------------------------------------------------|-----------|--------|-----------------------------|
|     |                | methylpentanoate, (2S)-2-Amino-4-methylpentanoic acid, (S)-(+)-Leucine, (S)-2-Amino-4-methylpentanoate, (S)-2-Amino-4-methylpentanoic acid, (S)-2-Amino-4-methylvalerate, (S)-2-Amino-4-methylvaleric acid, (S)-Leucine, 4-Methyl-L-Norvaline, L-(+)-Leucine, L-alpha-Aminoisocaproate, L-alpha-Aminoisocaproic acid, L-alpha-Aminoisocaproate, L-alpha-Aminoisocaproic acid, Leu, Leucine |           |        |                             |
|     | L-Leucine      | beta-Leucine, L-beta-Leucine                                                                                                                                                                                                                                                                                                                                                               | HMDB00687 | C00123 | Amino Acids and Derivatives |
|     | beta-Leucine   |                                                                                                                                                                                                                                                                                                                                                                                            | HMDB03640 | C02486 | Amino Acids and Derivatives |
|     | D-beta-Leucine | beta-2-Amino-4-                                                                                                                                                                                                                                                                                                                                                                            | HMDB03640 | C02486 | Amino Acids and Derivatives |
|     | L-beta-Leucine | methylvaleric acid,                                                                                                                                                                                                                                                                                                                                                                        | HMDB03640 | C02486 | Amino Acids and Derivatives |
|     | D-Leucine      | beta-Leucine, L-beta-                                                                                                                                                                                                                                                                                                                                                                      | HMDB13773 | C01570 | Amino Acids and Derivatives |
|     | L-Leucine      | Leucine                                                                                                                                                                                                                                                                                                                                                                                    | HMDB00687 | C00123 | Amino Acids and Derivatives |
|     | D-beta-Leucine | beta-2-Amino-4-                                                                                                                                                                                                                                                                                                                                                                            | HMDB03640 | C02486 | Amino Acids and Derivatives |
| Leu | L-beta-Leucine | methylvaleric acid,                                                                                                                                                                                                                                                                                                                                                                        | HMDB03640 | C02486 | Amino Acids and Derivatives |

Supplement table 1

|     |          |                                                                                                                                                                                                                                                                                                                                                                                                                                                                                                                                                                                                                                               |           |        |                             |
|-----|----------|-----------------------------------------------------------------------------------------------------------------------------------------------------------------------------------------------------------------------------------------------------------------------------------------------------------------------------------------------------------------------------------------------------------------------------------------------------------------------------------------------------------------------------------------------------------------------------------------------------------------------------------------------|-----------|--------|-----------------------------|
|     |          | diamino-Hexanoate,<br>(S)-2, 6-diamino-<br>Hexanoic acid, (S)-2,<br>6-Diaminohexanoate,<br>(S)-2, 6-<br>Diaminohexanoic<br>acid, (S)-a, e-<br>Diaminocaproate, (S)-<br>a, e-Diaminocaproic<br>acid, (S)-Lysine, 2, 6-<br>Diaminohexanoate,<br>2, 6-<br>Diaminohexanoic<br>acid, 6-Amino-<br>Aminutrin, 6-Amino-L-<br>Norleucine, a-Lysine,<br>alpha-Lysine,<br>Aminutrin, h-Lys-oh,<br>L-(+)-Lysine, L-2, 6-<br>Diaminohexanoate, L-<br>2, 6-Diaminohexanoic<br>acid, L-2, 6-<br>Diaminocaproate, L-<br>2, 6-Diaminocaproic<br>acid, L-Lys, Lys,<br>Lysine, Lysine acid<br>D-2, 6-<br>Diaminohexanoate,<br>D-2, 6-<br>Diaminohexanoic<br>acid |           |        |                             |
| Lys | L-Lysine | (+)-S-Lysine, (S)-2, 6-                                                                                                                                                                                                                                                                                                                                                                                                                                                                                                                                                                                                                       | HMDB00182 | C00047 | Amino Acids and Derivatives |
|     | D-Lysine | Diaminohexanoic                                                                                                                                                                                                                                                                                                                                                                                                                                                                                                                                                                                                                               | HMDB03405 | C00739 | Amino Acids and Derivatives |
|     | L-Lysine | acid                                                                                                                                                                                                                                                                                                                                                                                                                                                                                                                                                                                                                                          | HMDB00182 | C00047 | Amino Acids and Derivatives |
|     | D-Lysine | (+)-S-Lysine, (S)-2, 6-                                                                                                                                                                                                                                                                                                                                                                                                                                                                                                                                                                                                                       | HMDB03405 | C00739 | Amino Acids and Derivatives |

Supplement table 1

|     |                              |                      |                        |                  |                                                            |
|-----|------------------------------|----------------------|------------------------|------------------|------------------------------------------------------------|
| Met | L-Methionine<br>L-Methionine | (2S)-2-amino-4-(meth | HMDB00696<br>HMDB00696 | C00073<br>C00073 | Amino Acids and Derivatives<br>Amino Acids and Derivatives |
|-----|------------------------------|----------------------|------------------------|------------------|------------------------------------------------------------|

Supplement table 1

|        |                                                  |                                                                                                                                                                                                                                                                                                                                                                                                                                                                                                                              |                        |                                                            |
|--------|--------------------------------------------------|------------------------------------------------------------------------------------------------------------------------------------------------------------------------------------------------------------------------------------------------------------------------------------------------------------------------------------------------------------------------------------------------------------------------------------------------------------------------------------------------------------------------------|------------------------|------------------------------------------------------------|
| Met-SO | L-Methionine sulfoxide<br>L-Methionine sulfoxide | 2-Amino-4-(methylsulfinyl)-Butanoate, 2-Amino-4-(methylsulfinyl)-Butanoic acid, alpha-Amino-gamma-(methylsulfinyl)-Butyric acid, DL-Methionine sulfoxide, L-Methionine (S)-S-oxide, L-Methionine R-oxide, L-Methionine sulfoxide, Met-SO, S-Oxide-methionine<br>2-Amino-4-(methylsulfinyl)-Butanoate, 2-Amino-4-(methylsulfinyl)-Butanoic acid, alpha-Amino-gamma-(methylsulfinyl)-Butyric acid, DL-Methionine sulfoxide, L-Methionine (S)-S-oxide, L-Methionine R-oxide, L-Methionine sulfoxide, Met-SO, S-Oxide-methionine | HMDB02005<br>HMDB02005 | Amino Acids and Derivatives<br>Amino Acids and Derivatives |
|--------|--------------------------------------------------|------------------------------------------------------------------------------------------------------------------------------------------------------------------------------------------------------------------------------------------------------------------------------------------------------------------------------------------------------------------------------------------------------------------------------------------------------------------------------------------------------------------------------|------------------------|------------------------------------------------------------|

Supplement table 1

|           |                                    |                                                                                                                        |                        |  |                                                            |
|-----------|------------------------------------|------------------------------------------------------------------------------------------------------------------------|------------------------|--|------------------------------------------------------------|
| Nitro-Tyr | 3-Nitrotyrosine<br>3-Nitrotyrosine | 3-Nitrotyrosine, 5-<br>Nitrotyrosine, m-<br>Nitrotyrosine<br>3-Nitrotyrosine, 5-<br>Nitrotyrosine, m-<br>Nitrotyrosine | HMDB01904<br>HMDB01904 |  | Amino Acids and Derivatives<br>Amino Acids and Derivatives |
|-----------|------------------------------------|------------------------------------------------------------------------------------------------------------------------|------------------------|--|------------------------------------------------------------|



Supplement table 1

|        |                         |                                                                                                                                                                                                                                                                                                                                                                                                                     |           |        |                             |
|--------|-------------------------|---------------------------------------------------------------------------------------------------------------------------------------------------------------------------------------------------------------------------------------------------------------------------------------------------------------------------------------------------------------------------------------------------------------------|-----------|--------|-----------------------------|
|        |                         | pyrrolidinecarboxylic acid, (2S, 4R)-4-hydroxypyrrolidine-2-carboxylic acid, (4R)-4-hydroxy-L-proline, 4-Hydroxy-2-pyrrolidinecarboxylic acid, 4-Hydroxy-L-proline, 4-L-Hydroxyproline, delta-Hydroxyproline, Hydroxiproline, Hydroxy-L-proline, Hydroxy-proline, Hydroxyproline, L-4-Hydroxyproline, L-Hydroxyproline, L-Threo-4-hydroxyproline, LS-hydroxyproline, Oxaceprol, trans-4-Hydroxy-L-proline, trans-4- |           |        |                             |
|        | 4-Hydroxyproline        | trans-4-                                                                                                                                                                                                                                                                                                                                                                                                            |           |        |                             |
|        | 3-Hydroxy-L-proline     | Hydroxyproline,                                                                                                                                                                                                                                                                                                                                                                                                     |           |        |                             |
|        | 4-Hydroxy-L-proline     | Trans-                                                                                                                                                                                                                                                                                                                                                                                                              | HMDB00725 | C01157 | Amino Acids and Derivatives |
|        | cis-4-Hydroxy-L-proline | hydroxyproline,                                                                                                                                                                                                                                                                                                                                                                                                     | HMDB02113 | C04397 | Amino Acids and Derivatives |
|        | 4-Hydroxy-L-proline     | Trans-L-                                                                                                                                                                                                                                                                                                                                                                                                            | HMDB06055 | C01015 | Amino Acids and Derivatives |
|        | 4-Hydroxy-L-proline     | hydroxyproline                                                                                                                                                                                                                                                                                                                                                                                                      | HMDB06055 | C01015 | Amino Acids and Derivatives |
|        | 4-Hydroxyproline        | Procollagen trans-3-                                                                                                                                                                                                                                                                                                                                                                                                | HMDB00725 | C01157 | Amino Acids and Derivatives |
|        | 3-Hydroxy-L-proline     | hydroxy-L-proline                                                                                                                                                                                                                                                                                                                                                                                                   | HMDB00725 | C01157 | Amino Acids and Derivatives |
|        | cis-4-Hydroxy-L-proline | (2S)-4-                                                                                                                                                                                                                                                                                                                                                                                                             | HMDB02113 | C04397 | Amino Acids and Derivatives |
| OH-Pro |                         | hydroxypyrrolidine-2-                                                                                                                                                                                                                                                                                                                                                                                               | HMDB06055 | C01015 | Amino Acids and Derivatives |

Supplement table 1

|             |                                                                       |                                                                                                                                                                                                                                                                                                                                                                                                                                                                                                                            |                                                               |                                                |                                                                                                                                                         |
|-------------|-----------------------------------------------------------------------|----------------------------------------------------------------------------------------------------------------------------------------------------------------------------------------------------------------------------------------------------------------------------------------------------------------------------------------------------------------------------------------------------------------------------------------------------------------------------------------------------------------------------|---------------------------------------------------------------|------------------------------------------------|---------------------------------------------------------------------------------------------------------------------------------------------------------|
|             |                                                                       | 2, 5-Diaminopentanoate, (S)-2, 5-Diaminopentanoic acid, (S)-a, D-Diaminovalerate, (S)-a, D-Diaminovaleric acid, (S)-Ornithine, 5-Amino-L-Norvaline, L-(-)-Ornithine, L-Ornithine (+)-S-Ornithine, (S)-2, 5-Diaminopentanoate, (S)-2, 5-Diaminopentanoic acid, (S)-a, D-Diaminovalerate, (S)-a, D-Diaminovaleric acid, (S)-Ornithine, 5-Amino-L-Norvaline, L-(-)-Ornithine, L-Ornithine (2R)-2, 5-diaminopentanoate, (2R)-2, 5-diaminopentanoic acid, (R)-ornithine, Ornithine (+)-S-Ornithine, (S)-2, 5-Diaminopentanoate, |                                                               |                                                |                                                                                                                                                         |
| Orn         | Ornithine<br>L-Ornithine<br>D-Ornithine<br>L-Ornithine<br>D-Ornithine |                                                                                                                                                                                                                                                                                                                                                                                                                                                                                                                            | HMDB00214<br>HMDB00214<br>HMDB03374<br>HMDB00214<br>HMDB03374 | C00077<br>C00077<br>C00515<br>C00077<br>C00515 | Amino Acids and Derivatives<br>Amino Acids and Derivatives<br>Amino Acids and Derivatives<br>Amino Acids and Derivatives<br>Amino Acids and Derivatives |
| PC aa C26:0 | PC aa C26:0                                                           |                                                                                                                                                                                                                                                                                                                                                                                                                                                                                                                            |                                                               |                                                |                                                                                                                                                         |
| PC aa C28:1 | PC aa C28:1                                                           |                                                                                                                                                                                                                                                                                                                                                                                                                                                                                                                            |                                                               |                                                |                                                                                                                                                         |

Supplement table 1

|             |               |                                                                                                                                                                                                                                                                                                                                                                                                                                                                                                             |           |        |                      |
|-------------|---------------|-------------------------------------------------------------------------------------------------------------------------------------------------------------------------------------------------------------------------------------------------------------------------------------------------------------------------------------------------------------------------------------------------------------------------------------------------------------------------------------------------------------|-----------|--------|----------------------|
|             |               | <p>palmitoyl-sn-glycero-3-phosphocholine, GPCho(14:0/16:0), GPCho(30:0), Lecithin, PC aa C30:0, PC(14:0/16:0), PC(30:0), Phosphatidylcholine(14:0/16:0), Phosphatidylcholine(30:0)</p> <p>1, 2-Dipentadecanoyl-rac-glycero-3-phosphocholine, GPCho(15:0/15:0), GPCho(30:0), Lecithin, PC aa C30:0, PC(15:0/15:0), PC(30:0), Phosphatidylcholine(15:0/15:0), Phosphatidylcholine(30:0)</p> <p>1-Palmitoyl-2-myristoyl-sn-glycero-3-phosphocholine, GPCho(16:0/14:0), GPCho(30:0), Lecithin, PC aa C30:0,</p> |           |        |                      |
|             | PC(14:0/16:0) |                                                                                                                                                                                                                                                                                                                                                                                                                                                                                                             | HMDB07869 | C00157 | Glycerophospholipids |
|             | PC(15:0/15:0) |                                                                                                                                                                                                                                                                                                                                                                                                                                                                                                             | HMDB07934 | C00157 | Glycerophospholipids |
|             | PC(16:0/14:0) |                                                                                                                                                                                                                                                                                                                                                                                                                                                                                                             | HMDB07965 | C00157 | Glycerophospholipids |
|             | PC(14:0/16:0) |                                                                                                                                                                                                                                                                                                                                                                                                                                                                                                             | HMDB07869 | C00157 | Glycerophospholipids |
|             | PC(15:0/15:0) |                                                                                                                                                                                                                                                                                                                                                                                                                                                                                                             | HMDB07934 | C00157 | Glycerophospholipids |
| PC aa C30:0 | PC(16:0/14:0) |                                                                                                                                                                                                                                                                                                                                                                                                                                                                                                             | HMDB07965 | C00157 | Glycerophospholipids |
| PC aa C30:2 | PC aa C30:2   |                                                                                                                                                                                                                                                                                                                                                                                                                                                                                                             |           |        |                      |

Supplement table 1

|             |               |                       |           |        |                      |
|-------------|---------------|-----------------------|-----------|--------|----------------------|
|             |               |                       |           |        |                      |
|             | PC(16:0/16:0) |                       | HMDB00564 | C00157 | Glycerophospholipids |
|             | PC(14:0/18:0) |                       | HMDB07871 | C00157 | Glycerophospholipids |
|             | PC(18:0/14:0) |                       | HMDB08031 | C00157 | Glycerophospholipids |
|             | PC(16:0/16:0) |                       | HMDB00564 | C00157 | Glycerophospholipids |
|             | PC(14:0/18:0) |                       | HMDB07871 | C00157 | Glycerophospholipids |
| PC aa C32:0 | PC(18:0/14:0) | (R)-4-hydroxy-N, N, N | HMDB08031 | C00157 | Glycerophospholipids |

Supplement table 1

|             |                    |                                                                                                                                                                                                                                                                                                                               |           |        |                      |
|-------------|--------------------|-------------------------------------------------------------------------------------------------------------------------------------------------------------------------------------------------------------------------------------------------------------------------------------------------------------------------------|-----------|--------|----------------------|
|             |                    | vaccenoyl-sn-glycero-3-phosphocholine, GPCho(14:0/18:1), GPCho(14:0/18:1n7), GPCho(14:0/18:1w7), GPCho(32:1), Lecithin, PC aa C32:1, PC(14:0/18:1), PC(14:0/18:1n7), PC(14:0/18:1w7), PC(32:1), Phosphatidylcholine(14:0/18:1), Phosphatidylcholine(14:0/18:1n7), Phosphatidylcholine(14:0/18:1w7), Phosphatidylcholine(32:1) |           |        |                      |
|             | PC(14:0/18:1(11Z)) | 1-Myristoyl-2-oleoyl-sn-glycero-3-phosphocholine, GPCho(14:0/18:1), GPCho(14:0/18:1n9),                                                                                                                                                                                                                                       | HMDB07872 | C00157 | Glycerophospholipids |
|             | PC(14:0/18:1(9Z))  | GPCho(14:0/18:1w9),                                                                                                                                                                                                                                                                                                           | HMDB07873 | C00157 | Glycerophospholipids |
|             | PC(16:0/16:1(9Z))  | , GPCho(32:1),                                                                                                                                                                                                                                                                                                                | HMDB07969 | C00157 | Glycerophospholipids |
|             | PC(18:1(9Z)/14:0)  | Lecithin, PC aa                                                                                                                                                                                                                                                                                                               | HMDB08097 | C00157 | Glycerophospholipids |
|             | PC(14:0/18:1(11Z)) | C32:1,                                                                                                                                                                                                                                                                                                                        | HMDB07872 | C00157 | Glycerophospholipids |
|             | PC(14:0/18:1(9Z))  | PC(14:0/18:1),                                                                                                                                                                                                                                                                                                                | HMDB07873 | C00157 | Glycerophospholipids |
|             | PC(16:0/16:1(9Z))  | PC(14:0/18:1n9),                                                                                                                                                                                                                                                                                                              | HMDB07969 | C00157 | Glycerophospholipids |
| PC aa C32:1 | PC(18:1(9Z)/14:0)  | PC(14:0/18:1w9),                                                                                                                                                                                                                                                                                                              | HMDB08097 | C00157 | Glycerophospholipids |

Supplement table 1

|             |                       |                                                                                                                                                                                                                                                                                                                               |           |        |                      |
|-------------|-----------------------|-------------------------------------------------------------------------------------------------------------------------------------------------------------------------------------------------------------------------------------------------------------------------------------------------------------------------------|-----------|--------|----------------------|
|             |                       | linoleoyl-sn-glycero-3-phosphocholine, GPCho(14:0/18:2), GPCho(14:0/18:2n6), GPCho(14:0/18:2w6), GPCho(32:2), Lecithin, PC aa C32:2, PC(14:0/18:2), PC(14:0/18:2n6), PC(14:0/18:2w6), PC(32:2), Phosphatidylcholine(14:0/18:2), Phosphatidylcholine(14:0/18:2n6), Phosphatidylcholine(14:0/18:2w6), Phosphatidylcholine(32:2) |           |        |                      |
|             | PC(14:0/18:2(9Z,12Z)) | GPCho(16:1n7/16:1n7),                                                                                                                                                                                                                                                                                                         |           |        |                      |
|             | PC(16:1(9Z)/16:1(9Z)) | GPCho(16:1w7/16:1w7), GPCho(32:2),                                                                                                                                                                                                                                                                                            |           |        |                      |
|             | PC(14:0/18:2(9Z,12Z)) | Lecithin, PC aa C32:2,                                                                                                                                                                                                                                                                                                        | HMDB07874 | C00157 | Glycerophospholipids |
|             | PC(16:1(9Z)/16:1(9Z)) | PC(16:1/16:1),                                                                                                                                                                                                                                                                                                                | HMDB08002 | C00157 | Glycerophospholipids |
| PC aa C32:2 |                       | PC(16:1n7/16:1n7),                                                                                                                                                                                                                                                                                                            | HMDB07874 | C00157 | Glycerophospholipids |
|             |                       |                                                                                                                                                                                                                                                                                                                               | HMDB08002 | C00157 | Glycerophospholipids |

Supplement table 1

|             |                                                        |                                                                                                                                                                                                                                                                                                                                                                                                                                                                                                                                                                             |                        |                  |                                              |
|-------------|--------------------------------------------------------|-----------------------------------------------------------------------------------------------------------------------------------------------------------------------------------------------------------------------------------------------------------------------------------------------------------------------------------------------------------------------------------------------------------------------------------------------------------------------------------------------------------------------------------------------------------------------------|------------------------|------------------|----------------------------------------------|
| PC aa C32:3 | PC(14:0/18:3(9Z,12Z,15Z))<br>PC(14:0/18:3(9Z,12Z,15Z)) | linolenoyl-sn-glycero-3-phosphocholine, 1-Myristoyl-2-alpha-linolenoyl-sn-glycero-3-phosphocholine, GPCho(14:0/18:3), GPCho(14:0/18:3n3), GPCho(14:0/18:3w3), GPCho(32:3), Lecithin, PC aa C32:3, PC(14:0/18:3), PC(14:0/18:3n3), PC(14:0/18:3w3), PC(32:3), Phosphatidylcholine(14:0/18:3), Phosphatidylcholine(14:0/18:3n3), Phosphatidylcholine(14:0/18:3w3), Phosphatidylcholine(32:3) 1-Myristoyl-2-alpha-linolenoyl-sn-glycero-3-phosphocholine, 1-Myristoyl-2-alpha-linolenoyl-sn-glycero-3-phosphocholine, GPCho(14:0/18:3), GPCho(14:0/18:3n3), GPCho(14:0/18:3w3) | HMDB07876<br>HMDB07876 | C00157<br>C00157 | Glycerophospholipids<br>Glycerophospholipids |
|-------------|--------------------------------------------------------|-----------------------------------------------------------------------------------------------------------------------------------------------------------------------------------------------------------------------------------------------------------------------------------------------------------------------------------------------------------------------------------------------------------------------------------------------------------------------------------------------------------------------------------------------------------------------------|------------------------|------------------|----------------------------------------------|

Supplement table 1

|             |                    |                                                                                                                                                                                                                                                                                                                               |           |        |                      |
|-------------|--------------------|-------------------------------------------------------------------------------------------------------------------------------------------------------------------------------------------------------------------------------------------------------------------------------------------------------------------------------|-----------|--------|----------------------|
|             |                    | vaccenoyl-sn-glycero-3-phosphocholine, GPCho(16:0/18:1), GPCho(16:0/18:1n7), GPCho(16:0/18:1w7), GPCho(34:1), Lecithin, PC aa C34:1, PC(16:0/18:1), PC(16:0/18:1n7), PC(16:0/18:1w7), PC(34:1), Phosphatidylcholine(16:0/18:1), Phosphatidylcholine(16:0/18:1n7), Phosphatidylcholine(16:0/18:1w7), Phosphatidylcholine(34:1) |           |        |                      |
|             | PC(16:0/18:1(11Z)) | 1-Palmitoyl-2-oleoyl-sn-glycero-3-phosphocholine,                                                                                                                                                                                                                                                                             | HMDB07971 | C00157 | Glycerophospholipids |
|             | PC(16:0/18:1(9Z))  | GPCho(16:0/18:1),                                                                                                                                                                                                                                                                                                             | HMDB07972 | C00157 | Glycerophospholipids |
|             | PC(16:1(9Z)/18:0)  | GPCho(16:0/18:1n9),                                                                                                                                                                                                                                                                                                           | HMDB08003 | C00157 | Glycerophospholipids |
|             | PC(18:0/16:1(9Z))  | GPCho(16:0/18:1w9)                                                                                                                                                                                                                                                                                                            | HMDB08035 | C00157 | Glycerophospholipids |
|             | PC(18:1(9Z)/16:0)  | , GPCho(34:1),                                                                                                                                                                                                                                                                                                                | HMDB08100 | C00157 | Glycerophospholipids |
|             | PC(16:0/18:1(11Z)) | Lecithin, PC aa                                                                                                                                                                                                                                                                                                               | HMDB07971 | C00157 | Glycerophospholipids |
|             | PC(16:0/18:1(9Z))  | C34:1,                                                                                                                                                                                                                                                                                                                        | HMDB07972 | C00157 | Glycerophospholipids |
|             | PC(16:1(9Z)/18:0)  | PC(16:0/18:1),                                                                                                                                                                                                                                                                                                                | HMDB08003 | C00157 | Glycerophospholipids |
|             | PC(18:0/16:1(9Z))  | PC(16:0/18:1n9),                                                                                                                                                                                                                                                                                                              | HMDB08035 | C00157 | Glycerophospholipids |
| PC aa C34:1 | PC(18:1(9Z)/16:0)  | PC(16:0/18:1w9),                                                                                                                                                                                                                                                                                                              | HMDB08100 | C00157 | Glycerophospholipids |



Supplement table 1

|             |                        |                                                                                                                                                                                                 |  |        |                      |
|-------------|------------------------|-------------------------------------------------------------------------------------------------------------------------------------------------------------------------------------------------|--|--------|----------------------|
|             |                        | linoleoyl-sn-glycero-3-phosphocholine, GPCho(16:0/18:2), GPCho(16:0/18:2n6), GPCho(16:0/18:2w6), GPCho(34:2), Lecithin, PC aa C34:2, PC(16:0/18:2), PC(16:0/18:2n6), PC(16:0/18:2w6), PC(34:2), |  |        |                      |
|             | PC(16:0/18:2(9Z,12Z))  | Phosphatidylcholine(16:0/18:2),                                                                                                                                                                 |  |        |                      |
|             | PC(16:1(9Z)/18:1(11Z)) | Phosphatidylcholine(16:0/18:2n6),                                                                                                                                                               |  |        |                      |
|             | PC(16:1(9Z)/18:1(9Z))  | Phosphatidylcholine(16:0/18:2w6),                                                                                                                                                               |  |        |                      |
|             | PC(18:1(9Z)/16:1(9Z))  | Phosphatidylcholine(34:2)                                                                                                                                                                       |  |        |                      |
|             | PC(18:2(9Z,12Z)/16:0)  | 1-Palmitoleoyl-2-vaccenoyl-sn-glycero-                                                                                                                                                          |  |        |                      |
|             | PC(16:0/18:2(9Z,12Z))  | 3-phosphocholine, HMDB07973                                                                                                                                                                     |  | C00157 | Glycerophospholipids |
|             |                        | GPCho(16:1/18:1), HMDB08004                                                                                                                                                                     |  | C00157 | Glycerophospholipids |
|             | PC(16:1(9Z)/18:1(11Z)) | GPCho(16:1n7/18:1n7), HMDB08005                                                                                                                                                                 |  | C00157 | Glycerophospholipids |
|             |                        | 7), HMDB08101                                                                                                                                                                                   |  | C00157 | Glycerophospholipids |
|             | PC(16:1(9Z)/18:1(9Z))  | GPCho(16:1w7/18:1w7), GPCho(34:2), HMDB08133                                                                                                                                                    |  | C00157 | Glycerophospholipids |
|             |                        | HMDB07973                                                                                                                                                                                       |  | C00157 | Glycerophospholipids |
|             | PC(18:1(9Z)/16:1(9Z))  | Lecithin, PC aa C34:2, HMDB08004                                                                                                                                                                |  | C00157 | Glycerophospholipids |
|             |                        | HMDB08005                                                                                                                                                                                       |  | C00157 | Glycerophospholipids |
|             | PC(18:2(9Z,12Z)/16:0)  | PC(16:1/18:1), HMDB08101                                                                                                                                                                        |  | C00157 | Glycerophospholipids |
| PC aa C34:2 |                        | PC(16:1n7/18:1n7), HMDB08133                                                                                                                                                                    |  | C00157 | Glycerophospholipids |

Supplement table 1

|             |                           |                                                                                                                                                                                                                                                                                                                                                                                            |           |        |                      |
|-------------|---------------------------|--------------------------------------------------------------------------------------------------------------------------------------------------------------------------------------------------------------------------------------------------------------------------------------------------------------------------------------------------------------------------------------------|-----------|--------|----------------------|
|             |                           | linolenoyl-sn-glycero-3-phosphocholine, 1-Palmitoyl-2-gamma-linolenoyl-sn-glycero-3-phosphocholine, GPCho(16:0/18:3), GPCho(16:0/18:3n6), GPCho(16:0/18:3w6), GPCho(34:3), Lecithin, PC aa C34:3, PC(16:0/18:3), PC(16:0/18:3n6), PC(16:0/18:3w6), PC(34:3), Phosphatidylcholine(16:0/18:3), Phosphatidylcholine(16:0/18:3n6), Phosphatidylcholine(16:0/18:3w6), Phosphatidylcholine(34:3) |           |        |                      |
|             | PC(16:0/18:3(6Z,9Z,12Z))  | 1-Palmitoyl-2-alpha-linolenoyl-sn-glycero-3-phosphocholine, 1-Palmitoyl-2-alpha-linolenoyl-sn-glycero-3-phosphocholine,                                                                                                                                                                                                                                                                    | HMDB07974 | C00157 | Glycerophospholipids |
|             | PC(16:0/18:3(9Z,12Z,15Z)) | GPCho(16:0/18:3), GPCho(16:0/18:3n3), GPCho(16:0/18:3w3)                                                                                                                                                                                                                                                                                                                                   | HMDB07975 | C00157 | Glycerophospholipids |
|             | PC(16:1(9Z)/18:2(9Z,12Z)) |                                                                                                                                                                                                                                                                                                                                                                                            | HMDB08006 | C00157 | Glycerophospholipids |
|             | PC(16:0/18:3(6Z,9Z,12Z))  |                                                                                                                                                                                                                                                                                                                                                                                            | HMDB07974 | C00157 | Glycerophospholipids |
|             | PC(16:0/18:3(9Z,12Z,15Z)) |                                                                                                                                                                                                                                                                                                                                                                                            | HMDB07975 | C00157 | Glycerophospholipids |
| PC aa C34:3 | PC(16:1(9Z)/18:2(9Z,12Z)) |                                                                                                                                                                                                                                                                                                                                                                                            | HMDB08006 | C00157 | Glycerophospholipids |

Supplement table 1

|             |                                                                                                                                                 |                                                                                                                                                                                                                                                                                                                                                                                                                                                                                                                     |                                                                     |                                                         |                                                                                                                 |
|-------------|-------------------------------------------------------------------------------------------------------------------------------------------------|---------------------------------------------------------------------------------------------------------------------------------------------------------------------------------------------------------------------------------------------------------------------------------------------------------------------------------------------------------------------------------------------------------------------------------------------------------------------------------------------------------------------|---------------------------------------------------------------------|---------------------------------------------------------|-----------------------------------------------------------------------------------------------------------------|
| PC aa C34:4 | <p>PC(14:0/20:4(5Z,8Z,11Z,14Z))</p> <p>PC(16:0/18:4(6Z,9Z,12Z,15Z))</p> <p>PC(14:0/20:4(5Z,8Z,11Z,14Z))</p> <p>PC(16:0/18:4(6Z,9Z,12Z,15Z))</p> | <p>arachidonoyl-sn-glycero-3-phosphocholine, GPCho(14:0/20:4), GPCho(14:0/20:4n6), GPCho(14:0/20:4w6), GPCho(34:4), Lecithin, PC aa C34:4, PC(14:0/20:4), PC(14:0/20:4n6), PC(14:0/20:4w6), PC(34:4), Phosphatidylcholine(14:0/20:4), Phosphatidylcholine(14:0/20:4n6), Phosphatidylcholine(14:0/20:4w6), Phosphatidylcholine(34:4)</p> <p>1-Palmitoyl-2-stearidonoyl-sn-glycero-3-phosphocholine, GPCho(16:0/18:4), GPCho(16:0/18:4n3), GPCho(16:0/18:4w3), GPCho(34:4), Lecithin, PC aa C34:4, PC(16:0/18:4),</p> | <p>HMDB07883</p> <p>HMDB07976</p> <p>HMDB07883</p> <p>HMDB07976</p> | <p>C00157</p> <p>C00157</p> <p>C00157</p> <p>C00157</p> | <p>Glycerophospholipids</p> <p>Glycerophospholipids</p> <p>Glycerophospholipids</p> <p>Glycerophospholipids</p> |
|-------------|-------------------------------------------------------------------------------------------------------------------------------------------------|---------------------------------------------------------------------------------------------------------------------------------------------------------------------------------------------------------------------------------------------------------------------------------------------------------------------------------------------------------------------------------------------------------------------------------------------------------------------------------------------------------------------|---------------------------------------------------------------------|---------------------------------------------------------|-----------------------------------------------------------------------------------------------------------------|

Supplement table 1

|             |               |                                                                                                                                                                                |           |        |                      |
|-------------|---------------|--------------------------------------------------------------------------------------------------------------------------------------------------------------------------------|-----------|--------|----------------------|
|             |               | behenoyl-sn-glycero-3-phosphocholine, GPCho(14:0/22:0), GPCho(36:0), Lecithin, PC aa C36:0, PC(14:0/22:0), PC(36:0), Phosphatidylcholine(14:0/22:0), Phosphatidylcholine(36:0) |           |        |                      |
|             |               | 1-Palmitoyl-2-arachidonyl-sn-glycero-3-phosphocholine, GPCho(16:0/20:0), GPCho(36:0), Lecithin, PC aa C36:0, PC(16:0/20:0), PC(36:0),                                          |           |        |                      |
|             | PC(14:0/22:0) | Phosphatidylcholine(                                                                                                                                                           | HMDB07886 | C00157 | Glycerophospholipids |
|             | PC(16:0/20:0) | 16:0/20:0),                                                                                                                                                                    | HMDB07977 | C00157 | Glycerophospholipids |
|             | PC(18:0/18:0) | Phosphatidylcholine(                                                                                                                                                           | HMDB08036 | C00157 | Glycerophospholipids |
|             | PC(20:0/16:0) | 36:0)                                                                                                                                                                          | HMDB08265 | C00157 | Glycerophospholipids |
|             | PC(22:0/14:0) | 1, 2-Distearoyl-rac-                                                                                                                                                           | HMDB08525 | C00157 | Glycerophospholipids |
|             | PC(14:0/22:0) | glycero-3-                                                                                                                                                                     | HMDB07886 | C00157 | Glycerophospholipids |
|             | PC(16:0/20:0) | phosphocholine,                                                                                                                                                                | HMDB07977 | C00157 | Glycerophospholipids |
|             | PC(18:0/18:0) | GPCho(18:0/18:0),                                                                                                                                                              | HMDB08036 | C00157 | Glycerophospholipids |
|             | PC(20:0/16:0) | GPCho(36:0),                                                                                                                                                                   | HMDB08265 | C00157 | Glycerophospholipids |
| PC aa C36:0 | PC(22:0/14:0) | Lecithin, PC aa                                                                                                                                                                | HMDB08525 | C00157 | Glycerophospholipids |

Supplement table 1

|             |                    |                                                                                                                                                                                                                                                                                                                               |           |        |                      |
|-------------|--------------------|-------------------------------------------------------------------------------------------------------------------------------------------------------------------------------------------------------------------------------------------------------------------------------------------------------------------------------|-----------|--------|----------------------|
|             |                    | vaccenoyl-sn-glycero-3-phosphocholine, GPCho(18:0/18:1), GPCho(18:0/18:1n7), GPCho(18:0/18:1w7), GPCho(36:1), Lecithin, PC aa C36:1, PC(18:0/18:1), PC(18:0/18:1n7), PC(18:0/18:1w7), PC(36:1), Phosphatidylcholine(18:0/18:1), Phosphatidylcholine(18:0/18:1n7), Phosphatidylcholine(18:0/18:1w7), Phosphatidylcholine(36:1) |           |        |                      |
|             | PC(18:0/18:1(11Z)) | 1-Stearoyl-2-oleoyl-sn-glycero-3-phosphocholine, GPCho(18:0/18:1), GPCho(18:0/18:1n9),                                                                                                                                                                                                                                        | HMDB08037 | C00157 | Glycerophospholipids |
|             | PC(18:0/18:1(9Z))  | GPCho(18:0/18:1w9),                                                                                                                                                                                                                                                                                                           | HMDB08038 | C00157 | Glycerophospholipids |
|             | PC(18:1(11Z)/18:0) | , GPCho(36:1),                                                                                                                                                                                                                                                                                                                | HMDB08069 | C00157 | Glycerophospholipids |
|             | PC(18:1(9Z)/18:0)  | Lecithin, PC aa                                                                                                                                                                                                                                                                                                               | HMDB08102 | C00157 | Glycerophospholipids |
|             | PC(18:0/18:1(11Z)) | C36:1,                                                                                                                                                                                                                                                                                                                        | HMDB08037 | C00157 | Glycerophospholipids |
|             | PC(18:0/18:1(9Z))  | PC(18:0/18:1),                                                                                                                                                                                                                                                                                                                | HMDB08038 | C00157 | Glycerophospholipids |
|             | PC(18:1(11Z)/18:0) | PC(18:0/18:1n9),                                                                                                                                                                                                                                                                                                              | HMDB08069 | C00157 | Glycerophospholipids |
| PC aa C36:1 | PC(18:1(9Z)/18:0)  | PC(18:0/18:1w9),                                                                                                                                                                                                                                                                                                              | HMDB08102 | C00157 | Glycerophospholipids |

Supplement table 1

|             |                        |                                                                                                                                                                                                                                                                                                                      |           |        |                      |
|-------------|------------------------|----------------------------------------------------------------------------------------------------------------------------------------------------------------------------------------------------------------------------------------------------------------------------------------------------------------------|-----------|--------|----------------------|
|             |                        | sn-glycero-3-phosphocholine, GPCho(18:0/18:2), GPCho(18:0/18:2n6), GPCho(18:0/18:2w6), GPCho(36:2), Lecithin, PC aa C36:2, PC(18:0/18:2), PC(18:0/18:2n6), PC(18:0/18:2w6), PC(36:2), Phosphatidylcholine(18:0/18:2), Phosphatidylcholine(18:0/18:2n6), Phosphatidylcholine(18:0/18:2w6), Phosphatidylcholine(36:2)) |           |        |                      |
|             | PC(18:0/18:2(9Z,12Z))  | 1, 2-Divaccenoyl-rac-glycero-3-phosphocholine,                                                                                                                                                                                                                                                                       |           |        |                      |
|             | PC(18:1(11Z)/18:1(1Z)) | GPCho(18:1/18:1),                                                                                                                                                                                                                                                                                                    |           |        |                      |
|             | PC(18:2(9Z,12Z)/18:0)  | GPCho(18:1n7/18:1n7),                                                                                                                                                                                                                                                                                                | HMDB08039 | C00157 | Glycerophospholipids |
|             | PC(18:1(9Z)/18:1(9Z))  | GPCho(18:1w7/18:1w7), GPCho(36:2),                                                                                                                                                                                                                                                                                   | HMDB08070 | C00157 | Glycerophospholipids |
|             | PC(18:0/18:2(9Z,12Z))  | Lecithin, PC aa C36:2,                                                                                                                                                                                                                                                                                               | HMDB08135 | C00157 | Glycerophospholipids |
|             | PC(18:1(11Z)/18:1(1Z)) | PC(18:1/18:1),                                                                                                                                                                                                                                                                                                       | HMDB00593 | C00157 | Glycerophospholipids |
|             | PC(18:2(9Z,12Z)/18:0)  | PC(18:1n7/18:1n7),                                                                                                                                                                                                                                                                                                   | HMDB08039 | C00157 | Glycerophospholipids |
| PC aa C36:2 |                        |                                                                                                                                                                                                                                                                                                                      | HMDB08070 | C00157 | Glycerophospholipids |
|             |                        |                                                                                                                                                                                                                                                                                                                      | HMDB08135 | C00157 | Glycerophospholipids |

Supplement table 1

|             |                           |                                                                                                                                                                                                                                                                                                                             |           |        |                      |
|-------------|---------------------------|-----------------------------------------------------------------------------------------------------------------------------------------------------------------------------------------------------------------------------------------------------------------------------------------------------------------------------|-----------|--------|----------------------|
|             |                           | meadoyl-sn-glycero-3-phosphocholine, GPCho(16:0/20:3), GPCho(16:0/20:3n9), GPCho(16:0/20:3w9), GPCho(36:3), Lecithin, PC aa C36:3, PC(16:0/20:3), PC(16:0/20:3n9), PC(16:0/20:3w9), PC(36:3), Phosphatidylcholine(16:0/20:3), Phosphatidylcholine(16:0/20:3n9), Phosphatidylcholine(16:0/20:3w9), Phosphatidylcholine(36:3) |           |        |                      |
|             | PC(16:0/20:3(5Z,8Z,11Z))  | Phosphatidylcholine(16:0/20:3w9),                                                                                                                                                                                                                                                                                           |           |        |                      |
|             | PC(16:0/20:3(8Z,11Z,14Z)) | Phosphatidylcholine(36:3)                                                                                                                                                                                                                                                                                                   |           |        |                      |
|             | PC(18:0/18:3(6Z,9Z,12Z))  | 1-Palmitoyl-2-homog-linolenoyl-sn-glycero-3-phosphocholine, 1-Palmitoyl-2-homogamma-linolenoyl-sn-glycero-3-phosphocholine,                                                                                                                                                                                                 | HMDB07980 | C00157 | Glycerophospholipids |
|             | PC(18:1(9Z)/18:2(9Z,12Z)) | phosphocholine, 1-Palmitoyl-2-homogamma-linolenoyl-sn-glycero-3-phosphocholine,                                                                                                                                                                                                                                             | HMDB07981 | C00157 | Glycerophospholipids |
|             | PC(16:0/20:3(5Z,8Z,11Z))  | GPCho(16:0/20:3), GPCho(16:0/20:3n6), GPCho(16:0/20:3w6), GPCho(36:3),                                                                                                                                                                                                                                                      | HMDB08040 | C00157 | Glycerophospholipids |
|             | PC(16:0/20:3(8Z,11Z,14Z)) |                                                                                                                                                                                                                                                                                                                             | HMDB08105 | C00157 | Glycerophospholipids |
|             | PC(18:0/18:3(6Z,9Z,12Z))  |                                                                                                                                                                                                                                                                                                                             | HMDB07980 | C00157 | Glycerophospholipids |
|             | PC(18:1(9Z)/18:2(9Z,12Z)) |                                                                                                                                                                                                                                                                                                                             | HMDB07981 | C00157 | Glycerophospholipids |
| PC aa C36:3 |                           |                                                                                                                                                                                                                                                                                                                             | HMDB08040 | C00157 | Glycerophospholipids |
|             |                           |                                                                                                                                                                                                                                                                                                                             | HMDB08105 | C00157 | Glycerophospholipids |

Supplement table 1

|                               |                               |                                                        |           |                      |                      |
|-------------------------------|-------------------------------|--------------------------------------------------------|-----------|----------------------|----------------------|
| PC aa C36:4                   | PC(16:0/20:4(5Z,8Z,11Z,14Z))  | arachidonoyl-sn-glycero-3-phosphocholine,              |           |                      |                      |
|                               | PC(18:0/18:4(6Z,9Z,12Z,15Z))  | GPCho(16:0/20:4),                                      |           |                      |                      |
|                               | PC(18:1(9Z)/18:3(6Z,9Z,12Z))  | GPCho(16:0/20:4n6),                                    |           |                      |                      |
|                               | PC(18:1(9Z)/18:3(9Z,12Z,15Z)) | GPCho(16:0/20:4w6),                                    |           |                      |                      |
|                               | PC(18:2(9Z,12Z)/18:2(9Z,12Z)) | , GPCho(36:4),                                         |           |                      |                      |
|                               | PC(18:3(6Z,9Z,12Z)/18:1(9Z))  | Lecithin, PC aa                                        |           |                      |                      |
|                               | PC(18:3(9Z,12Z,15Z)/18:1(9Z)) | C36:4,                                                 |           |                      |                      |
|                               | PC(20:4(5Z,8Z,11Z,14Z)/16:0)  | PC(16:0/20:4),                                         |           |                      |                      |
|                               | PC(16:0/20:4(5Z,8Z,11Z,14Z))  | PC(16:0/20:4n6),                                       | HMDB07982 | C00157               | Glycerophospholipids |
|                               | PC(18:0/18:4(6Z,9Z,12Z,15Z))  | PC(16:0/20:4w6),                                       | HMDB08042 | C00157               | Glycerophospholipids |
|                               | PC(18:1(9Z)/18:3(6Z,9Z,12Z))  | Phosphatidylcholine(16:0/20:4),                        | HMDB08106 | C00157               | Glycerophospholipids |
|                               | PC(18:1(9Z)/18:3(6Z,9Z,12Z))  | Phosphatidylcholine(16:0/20:4n6),                      | HMDB08107 | C00157               | Glycerophospholipids |
|                               | PC(18:1(9Z)/18:3(9Z,12Z,15Z)) | Phosphatidylcholine(16:0/20:4w6),                      | HMDB08138 | C00157               | Glycerophospholipids |
|                               | PC(18:1(9Z)/18:3(9Z,12Z,15Z)) | 36:4)                                                  | HMDB08170 | C00157               | Glycerophospholipids |
|                               | PC(18:1(9Z)/18:3(9Z,12Z,15Z)) | 1-Stearoyl-2-stearidonoyl-sn-glycero-3-phosphocholine, | HMDB08203 | C00157               | Glycerophospholipids |
|                               | PC(18:2(9Z,12Z)/18:2(9Z,12Z)) | GPCho(18:0/18:4),                                      | HMDB08429 | C00157               | Glycerophospholipids |
|                               | PC(18:3(6Z,9Z,12Z)/18:1(9Z))  | GPCho(18:0/18:4n3),                                    | HMDB07982 | C00157               | Glycerophospholipids |
| PC(18:3(9Z,12Z,15Z)/18:1(9Z)) | GPCho(18:0/18:4w3),           | HMDB08042                                              | C00157    | Glycerophospholipids |                      |
| PC(20:4(5Z,8Z,11Z,14Z)/16:0)  | GPCho(18:0/18:4w3),           | HMDB08106                                              | C00157    | Glycerophospholipids |                      |
|                               | , GPCho(36:4),                | HMDB08107                                              | C00157    | Glycerophospholipids |                      |
|                               | Lecithin, PC aa               | HMDB08138                                              | C00157    | Glycerophospholipids |                      |
|                               | C36:4,                        | HMDB08170                                              | C00157    | Glycerophospholipids |                      |
|                               | PC(18:0/18:4),                | HMDB08203                                              | C00157    | Glycerophospholipids |                      |
|                               |                               | HMDB08429                                              | C00157    | Glycerophospholipids |                      |



Supplement table 1

|             |                                  |                                                                                                                                                                                                                                                                                                                                      |           |        |                      |
|-------------|----------------------------------|--------------------------------------------------------------------------------------------------------------------------------------------------------------------------------------------------------------------------------------------------------------------------------------------------------------------------------------|-----------|--------|----------------------|
|             |                                  | eicosapentaenoyl-sn-glycero-3-phosphocholine, GPCho(16:0/20:5), GPCho(16:0/20:5n3), GPCho(16:0/20:5w3), GPCho(36:5), Lecithin, PC aa C36:5, PC(16:0/20:5), PC(16:0/20:5n3), PC(16:0/20:5w3), PC(36:5), Phosphatidylcholine(16:0/20:5), Phosphatidylcholine(16:0/20:5n3), Phosphatidylcholine(16:0/20:5w3), Phosphatidylcholine(36:5) |           |        |                      |
|             | PC(16:0/20:5(5Z,8Z,11Z,14Z,17Z)) | 1-Palmitoleoyl-2-arachidonoyl-sn-glycero-3-phosphocholine, GPCho(16:1/20:4),                                                                                                                                                                                                                                                         |           |        |                      |
|             | PC(16:1(9Z)/20:4(5Z,8Z,11Z,14Z)) | GPCho(16:1n7/20:4n6),                                                                                                                                                                                                                                                                                                                |           |        |                      |
|             | PC(16:0/20:5(5Z,8Z,11Z,14Z,17Z)) | GPCho(16:1w7/20:4w6), GPCho(36:5),                                                                                                                                                                                                                                                                                                   | HMDB07984 | C00157 | Glycerophospholipids |
|             | PC(16:1(9Z)/20:4(5Z,8Z,11Z,14Z)) | Lecithin, PC aa C36:5,                                                                                                                                                                                                                                                                                                               | HMDB08015 | C00157 | Glycerophospholipids |
| PC aa C36:5 |                                  |                                                                                                                                                                                                                                                                                                                                      | HMDB07984 | C00157 | Glycerophospholipids |
|             |                                  |                                                                                                                                                                                                                                                                                                                                      | HMDB08015 | C00157 | Glycerophospholipids |

Supplement table 1

|             |                                                                                                                                                                                   |                                                                                                                                                                                                                                                                                                                                                                                                                                                                                                                      |                                                                     |                                                         |                                                                                                                 |
|-------------|-----------------------------------------------------------------------------------------------------------------------------------------------------------------------------------|----------------------------------------------------------------------------------------------------------------------------------------------------------------------------------------------------------------------------------------------------------------------------------------------------------------------------------------------------------------------------------------------------------------------------------------------------------------------------------------------------------------------|---------------------------------------------------------------------|---------------------------------------------------------|-----------------------------------------------------------------------------------------------------------------|
| PC aa C36:6 | <p>PC(14:0/22:6(4Z,7Z,10Z,13Z,16Z,19Z))</p> <p>PC(18:3(9Z,12Z,15Z)/18:3(9Z,12Z,15Z))</p> <p>PC(14:0/22:6(4Z,7Z,10Z,13Z,16Z,19Z))</p> <p>PC(18:3(9Z,12Z,15Z)/18:3(9Z,12Z,15Z))</p> | <p>docosahexaenoyl-sn-glycero-3-phosphocholine, GPCho(14:0/22:6), GPCho(14:0/22:6n3), GPCho(14:0/22:6w3), GPCho(36:6), Lecithin, PC aa C36:6, PC(14:0/22:6), PC(14:0/22:6n3), PC(14:0/22:6w3), PC(36:6), Phosphatidylcholine(14:0/22:6), Phosphatidylcholine(14:0/22:6n3), Phosphatidylcholine(14:0/22:6w3), Phosphatidylcholine(36:6)</p> <p>1, 2-Dia-linolenoyl-rac-glycero-3-phosphocholine, GPCho(18:3/18:3), GPCho(18:3n3/18:3n3), GPCho(18:3w3/18:3w3), GPCho(36:6), Lecithin, PC aa C36:6, PC(18:3/18:3),</p> | <p>HMDB07892</p> <p>HMDB08206</p> <p>HMDB07892</p> <p>HMDB08206</p> | <p>C00157</p> <p>C00157</p> <p>C00157</p> <p>C00157</p> | <p>Glycerophospholipids</p> <p>Glycerophospholipids</p> <p>Glycerophospholipids</p> <p>Glycerophospholipids</p> |
|-------------|-----------------------------------------------------------------------------------------------------------------------------------------------------------------------------------|----------------------------------------------------------------------------------------------------------------------------------------------------------------------------------------------------------------------------------------------------------------------------------------------------------------------------------------------------------------------------------------------------------------------------------------------------------------------------------------------------------------------|---------------------------------------------------------------------|---------------------------------------------------------|-----------------------------------------------------------------------------------------------------------------|

Supplement table 1

|             |               |                                                                                                                                                                                   |           |        |                      |
|-------------|---------------|-----------------------------------------------------------------------------------------------------------------------------------------------------------------------------------|-----------|--------|----------------------|
|             |               | lignoceroyl-sn-glycero-3-phosphocholine, GPCho(14:0/24:0), GPCho(38:0), Lecithin, PC aa C38:0, PC(14:0/24:0), PC(38:0), Phosphatidylcholine(14:0/24:0), Phosphatidylcholine(38:0) |           |        |                      |
|             |               | 1-Palmitoyl-2-behenoyl-sn-glycero-3-phosphocholine, GPCho(16:0/22:0), GPCho(38:0), Lecithin, PC aa C38:0,                                                                         |           |        |                      |
|             | PC(14:0/24:0) | PC(16:0/22:0),                                                                                                                                                                    | HMDB07893 | C00157 | Glycerophospholipids |
|             | PC(16:0/22:0) | PC(38:0),                                                                                                                                                                         | HMDB07985 | C00157 | Glycerophospholipids |
|             | PC(18:0/20:0) | Phosphatidylcholine(                                                                                                                                                              | HMDB08043 | C00157 | Glycerophospholipids |
|             | PC(20:0/18:0) | 16:0/22:0),                                                                                                                                                                       | HMDB08267 | C00157 | Glycerophospholipids |
|             | PC(22:0/16:0) | Phosphatidylcholine(                                                                                                                                                              | HMDB08528 | C00157 | Glycerophospholipids |
|             | PC(24:0/14:0) | 38:0)                                                                                                                                                                             | HMDB08755 | C00157 | Glycerophospholipids |
|             | PC(14:0/24:0) | 1-Stearoyl-2-                                                                                                                                                                     | HMDB07893 | C00157 | Glycerophospholipids |
|             | PC(16:0/22:0) | arachidonyl-sn-                                                                                                                                                                   | HMDB07985 | C00157 | Glycerophospholipids |
|             | PC(18:0/20:0) | glycero-3-                                                                                                                                                                        | HMDB08043 | C00157 | Glycerophospholipids |
|             | PC(20:0/18:0) | phosphocholine,                                                                                                                                                                   | HMDB08267 | C00157 | Glycerophospholipids |
|             | PC(22:0/16:0) | GPCho(18:0/20:0),                                                                                                                                                                 | HMDB08528 | C00157 | Glycerophospholipids |
| PC aa C38:0 | PC(24:0/14:0) | GPCho(38:0),                                                                                                                                                                      | HMDB08755 | C00157 | Glycerophospholipids |

Supplement table 1

|             |                    |                                                                                                                                                                                                                                                                                                                               |           |        |                      |
|-------------|--------------------|-------------------------------------------------------------------------------------------------------------------------------------------------------------------------------------------------------------------------------------------------------------------------------------------------------------------------------|-----------|--------|----------------------|
|             |                    | nervonoyl-sn-glycero-3-phosphocholine, GPCho(14:0/24:1), GPCho(14:0/24:1n9), GPCho(14:0/24:1w9), GPCho(38:1), Lecithin, PC aa C38:1, PC(14:0/24:1), PC(14:0/24:1n9), PC(14:0/24:1w9), PC(38:1), Phosphatidylcholine(14:0/24:1), Phosphatidylcholine(14:0/24:1n9), Phosphatidylcholine(14:0/24:1w9), Phosphatidylcholine(38:1) |           |        |                      |
|             | PC(14:0/24:1(15Z)) | 1-Palmitoyl-2-erucoyl-                                                                                                                                                                                                                                                                                                        | HMDB07894 | C00157 | Glycerophospholipids |
|             | PC(16:0/22:1(13Z)) | sn-glycero-3-                                                                                                                                                                                                                                                                                                                 | HMDB07986 | C00157 | Glycerophospholipids |
|             | PC(18:0/20:1(11Z)) | phosphocholine,                                                                                                                                                                                                                                                                                                               | HMDB08044 | C00157 | Glycerophospholipids |
|             | PC(18:1(9Z)/20:0)  | GPCho(16:0/22:1),                                                                                                                                                                                                                                                                                                             | HMDB08109 | C00157 | Glycerophospholipids |
|             | PC(20:0/18:1(11Z)) | GPCho(16:0/22:1n9),                                                                                                                                                                                                                                                                                                           | HMDB08268 | C00157 | Glycerophospholipids |
|             | PC(20:0/18:1(9Z))  | GPCho(16:0/22:1w9)                                                                                                                                                                                                                                                                                                            | HMDB08269 | C00157 | Glycerophospholipids |
|             | PC(14:0/24:1(15Z)) | , GPCho(38:1),                                                                                                                                                                                                                                                                                                                | HMDB07894 | C00157 | Glycerophospholipids |
|             | PC(16:0/22:1(13Z)) | Lecithin, PC aa                                                                                                                                                                                                                                                                                                               | HMDB07986 | C00157 | Glycerophospholipids |
|             | PC(18:0/20:1(11Z)) | C38:1,                                                                                                                                                                                                                                                                                                                        | HMDB08044 | C00157 | Glycerophospholipids |
|             | PC(18:1(9Z)/20:0)  | PC(16:0/22:1),                                                                                                                                                                                                                                                                                                                | HMDB08109 | C00157 | Glycerophospholipids |
|             | PC(20:0/18:1(11Z)) | PC(16:0/22:1n9),                                                                                                                                                                                                                                                                                                              | HMDB08268 | C00157 | Glycerophospholipids |
| PC aa C38:1 | PC(20:0/18:1(9Z))  | PC(16:0/22:1w9),                                                                                                                                                                                                                                                                                                              | HMDB08269 | C00157 | Glycerophospholipids |

Supplement table 1

|             |                                                                                                                                   |                                                                                                                                                                                                                                                                                                                                                                                                                                                                                                                                                      |                                                                     |                                                         |                                                                                                                 |
|-------------|-----------------------------------------------------------------------------------------------------------------------------------|------------------------------------------------------------------------------------------------------------------------------------------------------------------------------------------------------------------------------------------------------------------------------------------------------------------------------------------------------------------------------------------------------------------------------------------------------------------------------------------------------------------------------------------------------|---------------------------------------------------------------------|---------------------------------------------------------|-----------------------------------------------------------------------------------------------------------------|
| PC aa C38:3 | <p>PC(18:0/20:3(5Z,8Z,11Z))</p> <p>PC(18:0/20:3(8Z,11Z,14Z))</p> <p>PC(18:0/20:3(5Z,8Z,11Z))</p> <p>PC(18:0/20:3(8Z,11Z,14Z))</p> | <p>sn-glycero-3-phosphocholine, GPCho(18:0/20:3), GPCho(18:0/20:3n9), GPCho(18:0/20:3w9), GPCho(38:3), Lecithin, PC aa C38:3, PC(18:0/20:3), PC(18:0/20:3n9), PC(18:0/20:3w9), PC(38:3), Phosphatidylcholine(18:0/20:3), Phosphatidylcholine(18:0/20:3n9), Phosphatidylcholine(18:0/20:3w9), Phosphatidylcholine(38:3)</p> <p>1-Stearoyl-2-homo-g-linolenoyl-sn-glycero-3-phosphocholine, 1-Stearoyl-2-homo-gamma-linolenoyl-sn-glycero-3-phosphocholine, GPCho(18:0/20:3), GPCho(18:0/20:3n6), GPCho(18:0/20:3w6), GPCho(38:3), Lecithin, PC aa</p> | <p>HMDB08046</p> <p>HMDB08047</p> <p>HMDB08046</p> <p>HMDB08047</p> | <p>C00157</p> <p>C00157</p> <p>C00157</p> <p>C00157</p> | <p>Glycerophospholipids</p> <p>Glycerophospholipids</p> <p>Glycerophospholipids</p> <p>Glycerophospholipids</p> |
|-------------|-----------------------------------------------------------------------------------------------------------------------------------|------------------------------------------------------------------------------------------------------------------------------------------------------------------------------------------------------------------------------------------------------------------------------------------------------------------------------------------------------------------------------------------------------------------------------------------------------------------------------------------------------------------------------------------------------|---------------------------------------------------------------------|---------------------------------------------------------|-----------------------------------------------------------------------------------------------------------------|

Supplement table 1

|             |                               |                                                                                                                                                                                                                                                                                                                              |           |        |                      |
|-------------|-------------------------------|------------------------------------------------------------------------------------------------------------------------------------------------------------------------------------------------------------------------------------------------------------------------------------------------------------------------------|-----------|--------|----------------------|
|             |                               | adrenoyl-sn-glycero-3-phosphocholine, GPCho(16:0/22:4), GPCho(16:0/22:4n6), GPCho(16:0/22:4w6), GPCho(38:4), Lecithin, PC aa C38:4, PC(16:0/22:4), PC(16:0/22:4n6), PC(16:0/22:4w6), PC(38:4), Phosphatidylcholine(16:0/22:4), Phosphatidylcholine(16:0/22:4n6), Phosphatidylcholine(16:0/22:4w6), Phosphatidylcholine(38:4) |           |        |                      |
|             | PC(16:0/22:4(7Z,10Z,13Z,16Z)) | 1-Stearoyl-2-arachidonoyl-sn-glycero-3-phosphocholine,                                                                                                                                                                                                                                                                       |           |        |                      |
|             | PC(18:0/20:4(5Z,8Z,11Z,14Z))  | GPCho(18:0/20:4),                                                                                                                                                                                                                                                                                                            |           |        |                      |
|             | PC(18:1(9Z)/20:3(5Z,8Z,11Z))  | GPCho(18:0/20:4n6),                                                                                                                                                                                                                                                                                                          | HMDB07988 | C00157 | Glycerophospholipids |
|             | PC(16:0/22:4(7Z,10Z,13Z,16Z)) | GPCho(18:0/20:4w6), GPCho(38:4),                                                                                                                                                                                                                                                                                             | HMDB08048 | C00157 | Glycerophospholipids |
|             | PC(18:0/20:4(5Z,8Z,11Z,14Z))  | Lecithin, PC aa C38:4,                                                                                                                                                                                                                                                                                                       | HMDB08112 | C00157 | Glycerophospholipids |
|             | PC(18:1(9Z)/20:3(5Z,8Z,11Z))  | PC(18:0/20:4),                                                                                                                                                                                                                                                                                                               | HMDB07988 | C00157 | Glycerophospholipids |
| PC aa C38:4 |                               | PC(18:0/20:4n6),                                                                                                                                                                                                                                                                                                             | HMDB08048 | C00157 | Glycerophospholipids |
|             |                               |                                                                                                                                                                                                                                                                                                                              | HMDB08112 | C00157 | Glycerophospholipids |

Supplement table 1

|             |                                   |                                                                                                                                                                                                                                                                                                                                                                                                                                         |           |        |                      |
|-------------|-----------------------------------|-----------------------------------------------------------------------------------------------------------------------------------------------------------------------------------------------------------------------------------------------------------------------------------------------------------------------------------------------------------------------------------------------------------------------------------------|-----------|--------|----------------------|
|             |                                   | docosapentaenoyl-sn-glycero-3-phosphocholine, 1-Palmitoyl-2-<br>osbondoyl-sn-glycero-3-phosphocholine,<br>GPCho(16:0/22:5),<br>GPCho(16:0/22:5n6),<br>GPCho(16:0/22:5w6),<br>GPCho(38:5),<br>Lecithin, PC aa<br>C38:5,<br>PC(16:0/22:5),<br>PC(16:0/22:5n6),<br>PC(16:0/22:5w6),<br>PC(38:5),<br>Phosphatidylcholine(16:0/22:5),<br>Phosphatidylcholine(16:0/22:5n6),<br>Phosphatidylcholine(16:0/22:5w6),<br>Phosphatidylcholine(38:5) |           |        |                      |
|             | PC(16:0/22:5(4Z,7Z,10Z,13Z,16Z))  |                                                                                                                                                                                                                                                                                                                                                                                                                                         |           |        |                      |
|             | PC(16:0/22:5(7Z,10Z,13Z,16Z,19Z)) |                                                                                                                                                                                                                                                                                                                                                                                                                                         |           |        |                      |
|             | PC(18:0/20:5(5Z,8Z,11Z,14Z,17Z))  |                                                                                                                                                                                                                                                                                                                                                                                                                                         |           |        |                      |
|             | PC(18:1(9Z)/20:4(5Z,8Z,11Z,14Z))  |                                                                                                                                                                                                                                                                                                                                                                                                                                         |           |        |                      |
|             | PC(16:0/22:5(4Z,7Z,10Z,13Z,16Z))  | 1-Palmitoyl-2-                                                                                                                                                                                                                                                                                                                                                                                                                          | HMDB07989 | C00157 | Glycerophospholipids |
|             | PC(16:0/22:5(7Z,10Z,13Z,16Z,19Z)) | docosapentaenoyl-sn-glycero-3-                                                                                                                                                                                                                                                                                                                                                                                                          | HMDB07990 | C00157 | Glycerophospholipids |
|             | PC(18:0/20:5(5Z,8Z,11Z,14Z,17Z))  | phosphocholine,                                                                                                                                                                                                                                                                                                                                                                                                                         | HMDB08050 | C00157 | Glycerophospholipids |
|             | PC(18:1(9Z)/20:4(5Z,8Z,11Z,14Z))  | GPCho(16:0/22:5),                                                                                                                                                                                                                                                                                                                                                                                                                       | HMDB08114 | C00157 | Glycerophospholipids |
|             |                                   | GPCho(16:0/22:5n3),                                                                                                                                                                                                                                                                                                                                                                                                                     | HMDB07989 | C00157 | Glycerophospholipids |
|             |                                   | GPCho(16:0/22:5w3),                                                                                                                                                                                                                                                                                                                                                                                                                     | HMDB07990 | C00157 | Glycerophospholipids |
|             |                                   | , GPCho(38:5),                                                                                                                                                                                                                                                                                                                                                                                                                          | HMDB08050 | C00157 | Glycerophospholipids |
| PC aa C38:5 |                                   |                                                                                                                                                                                                                                                                                                                                                                                                                                         | HMDB08114 | C00157 | Glycerophospholipids |

Supplement table 1

|             |                                       |                                                                                                                                                                                                                                                                                                                                                                                                                                                                                                   |           |        |                      |
|-------------|---------------------------------------|---------------------------------------------------------------------------------------------------------------------------------------------------------------------------------------------------------------------------------------------------------------------------------------------------------------------------------------------------------------------------------------------------------------------------------------------------------------------------------------------------|-----------|--------|----------------------|
|             |                                       | docosahexaenoyl-sn-glycero-3-phosphocholine, GPCho(16:0/22:6), GPCho(16:0/22:6n3), GPCho(16:0/22:6w3), GPCho(38:6), Lecithin, PC aa C38:6, PC(16:0/22:6), PC(16:0/22:6n3), PC(16:0/22:6w3), PC(38:6), Phosphatidylcholine(16:0/22:6), Phosphatidylcholine(16:0/22:6n3), Phosphatidylcholine(16:0/22:6w3), Phosphatidylcholine(38:6) 1-Vaccenoyl-2-eicosapentaenoyl-sn-glycero-3-phosphocholine, GPCho(18:1/20:5), GPCho(18:1n7/20:5n3), GPCho(18:1w7/20:5w3), GPCho(38:6), Lecithin, PC aa C38:6, |           |        |                      |
|             | PC(16:0/22:6(4Z,7Z,10Z,13Z,16Z,19Z))  |                                                                                                                                                                                                                                                                                                                                                                                                                                                                                                   |           |        |                      |
|             | PC(18:1(11Z)/20:5(5Z,8Z,11Z,14Z,17Z)) |                                                                                                                                                                                                                                                                                                                                                                                                                                                                                                   |           |        |                      |
|             | PC(18:1(9Z)/20:5(5Z,8Z,11Z,14Z,17Z))  |                                                                                                                                                                                                                                                                                                                                                                                                                                                                                                   |           |        |                      |
|             | PC(18:2(9Z,12Z)/20:4(5Z,8Z,11Z,14Z))  |                                                                                                                                                                                                                                                                                                                                                                                                                                                                                                   |           |        |                      |
|             | PC(20:4(5Z,8Z,11Z,14Z)/18:2(9Z,12Z))  |                                                                                                                                                                                                                                                                                                                                                                                                                                                                                                   |           |        |                      |
|             | PC(20:5(5Z,8Z,11Z,14Z,17Z)/18:1(9Z))  |                                                                                                                                                                                                                                                                                                                                                                                                                                                                                                   |           |        |                      |
|             | PC(22:6(4Z,7Z,10Z,13Z,16Z,19Z)/16:0)  |                                                                                                                                                                                                                                                                                                                                                                                                                                                                                                   |           |        |                      |
|             | PC(16:0/22:6(4Z,7Z,10Z,13Z,16Z,19Z))  |                                                                                                                                                                                                                                                                                                                                                                                                                                                                                                   | HMDB07991 | C00157 | Glycerophospholipids |
|             | PC(18:1(11Z)/20:5(5Z,8Z,11Z,14Z,17Z)) |                                                                                                                                                                                                                                                                                                                                                                                                                                                                                                   | HMDB08083 | C00157 | Glycerophospholipids |
|             | PC(18:1(11Z)/20:5(5Z,8Z,11Z,14Z,17Z)) |                                                                                                                                                                                                                                                                                                                                                                                                                                                                                                   | HMDB08116 | C00157 | Glycerophospholipids |
|             | PC(18:1(9Z)/20:5(5Z,8Z,11Z,14Z,17Z))  |                                                                                                                                                                                                                                                                                                                                                                                                                                                                                                   | HMDB08147 | C00157 | Glycerophospholipids |
|             | PC(18:2(9Z,12Z)/20:4(5Z,8Z,11Z,14Z))  |                                                                                                                                                                                                                                                                                                                                                                                                                                                                                                   | HMDB08434 | C00157 | Glycerophospholipids |
|             | PC(20:4(5Z,8Z,11Z,14Z)/18:2(9Z,12Z))  |                                                                                                                                                                                                                                                                                                                                                                                                                                                                                                   | HMDB08499 | C00157 | Glycerophospholipids |
|             | PC(20:5(5Z,8Z,11Z,14Z,17Z)/18:1(9Z))  |                                                                                                                                                                                                                                                                                                                                                                                                                                                                                                   | HMDB08725 | C00157 | Glycerophospholipids |
|             | PC(22:6(4Z,7Z,10Z,13Z,16Z,19Z)/16:0)  |                                                                                                                                                                                                                                                                                                                                                                                                                                                                                                   | HMDB07991 | C00157 | Glycerophospholipids |
|             | PC(16:0/22:6(4Z,7Z,10Z,13Z,16Z,19Z))  |                                                                                                                                                                                                                                                                                                                                                                                                                                                                                                   | HMDB08083 | C00157 | Glycerophospholipids |
|             | PC(18:1(11Z)/20:5(5Z,8Z,11Z,14Z,17Z)) |                                                                                                                                                                                                                                                                                                                                                                                                                                                                                                   | HMDB08116 | C00157 | Glycerophospholipids |
|             | PC(18:1(9Z)/20:5(5Z,8Z,11Z,14Z,17Z))  |                                                                                                                                                                                                                                                                                                                                                                                                                                                                                                   | HMDB08147 | C00157 | Glycerophospholipids |
|             | PC(18:2(9Z,12Z)/20:4(5Z,8Z,11Z,14Z))  |                                                                                                                                                                                                                                                                                                                                                                                                                                                                                                   | HMDB08434 | C00157 | Glycerophospholipids |
|             | PC(20:4(5Z,8Z,11Z,14Z)/18:2(9Z,12Z))  |                                                                                                                                                                                                                                                                                                                                                                                                                                                                                                   | HMDB08499 | C00157 | Glycerophospholipids |
|             | PC(20:5(5Z,8Z,11Z,14Z,17Z)/18:1(9Z))  |                                                                                                                                                                                                                                                                                                                                                                                                                                                                                                   | HMDB08725 | C00157 | Glycerophospholipids |
| PC aa C38:6 |                                       |                                                                                                                                                                                                                                                                                                                                                                                                                                                                                                   | HMDB08725 | C00157 | Glycerophospholipids |



Supplement table 1

|             |                    |                                                                                                                                                                                                                                                                                                                               |           |        |                      |
|-------------|--------------------|-------------------------------------------------------------------------------------------------------------------------------------------------------------------------------------------------------------------------------------------------------------------------------------------------------------------------------|-----------|--------|----------------------|
|             |                    | nervonoyl-sn-glycero-3-phosphocholine, GPCho(16:0/24:1), GPCho(16:0/24:1n9), GPCho(16:0/24:1w9), GPCho(40:1), Lecithin, PC aa C40:1, PC(16:0/24:1), PC(16:0/24:1n9), PC(16:0/24:1w9), PC(40:1), Phosphatidylcholine(16:0/24:1), Phosphatidylcholine(16:0/24:1n9), Phosphatidylcholine(16:0/24:1w9), Phosphatidylcholine(40:1) |           |        |                      |
|             | PC(16:0/24:1(15Z)) | 1-Stearoyl-2-erucoyl-sn-glycero-3-phosphocholine,                                                                                                                                                                                                                                                                             | HMDB07993 | C00157 | Glycerophospholipids |
|             | PC(18:0/22:1(13Z)) | GPCho(18:0/22:1),                                                                                                                                                                                                                                                                                                             | HMDB08052 | C00157 | Glycerophospholipids |
|             | PC(18:1(11Z)/22:0) | GPCho(18:0/22:1n9),                                                                                                                                                                                                                                                                                                           | HMDB08084 | C00157 | Glycerophospholipids |
|             | PC(18:1(9Z)/22:0)  | GPCho(18:0/22:1w9)                                                                                                                                                                                                                                                                                                            | HMDB08117 | C00157 | Glycerophospholipids |
|             | PC(20:0/20:1(11Z)) | , GPCho(40:1),                                                                                                                                                                                                                                                                                                                | HMDB08275 | C00157 | Glycerophospholipids |
|             | PC(16:0/24:1(15Z)) | Lecithin, PC aa                                                                                                                                                                                                                                                                                                               | HMDB07993 | C00157 | Glycerophospholipids |
|             | PC(18:0/22:1(13Z)) | C40:1,                                                                                                                                                                                                                                                                                                                        | HMDB08052 | C00157 | Glycerophospholipids |
|             | PC(18:1(11Z)/22:0) | PC(18:0/22:1),                                                                                                                                                                                                                                                                                                                | HMDB08084 | C00157 | Glycerophospholipids |
|             | PC(18:1(9Z)/22:0)  | PC(18:0/22:1n9),                                                                                                                                                                                                                                                                                                              | HMDB08117 | C00157 | Glycerophospholipids |
| PC aa C40:1 | PC(20:0/20:1(11Z)) | PC(18:0/22:1w9),                                                                                                                                                                                                                                                                                                              | HMDB08275 | C00157 | Glycerophospholipids |

Supplement table 1

|             |                        |                                                                                                                                                                                                                                                                                                                                   |           |        |                      |
|-------------|------------------------|-----------------------------------------------------------------------------------------------------------------------------------------------------------------------------------------------------------------------------------------------------------------------------------------------------------------------------------|-----------|--------|----------------------|
|             |                        | eicosadienoyl-sn-glycero-3-phosphocholine, GPCho(20:0/20:2), GPCho(20:0/20:2n6), GPCho(20:0/20:2w6), GPCho(40:2), Lecithin, PC aa C40:2, PC(20:0/20:2), PC(20:0/20:2n6), PC(20:0/20:2w6), PC(40:2), Phosphatidylcholine(20:0/20:2), Phosphatidylcholine(20:0/20:2n6), Phosphatidylcholine(20:0/20:2w6), Phosphatidylcholine(40:2) |           |        |                      |
|             | PC(20:0/20:2(11Z,14Z)) | 1, 2-Dieicosenoyl-rac-glycero-3-phosphocholine, GPCho(20:1/20:1), GPCho(20:1n9/20:1n9), GPCho(20:1w9/20:1w9), GPCho(40:2), Lecithin, PC aa C40:2,                                                                                                                                                                                 | HMDB08276 | C00157 | Glycerophospholipids |
|             | PC(20:1(11Z)/20:1(1Z)) |                                                                                                                                                                                                                                                                                                                                   | HMDB08308 | C00157 | Glycerophospholipids |
|             | PC(20:0/20:2(11Z,14Z)) |                                                                                                                                                                                                                                                                                                                                   | HMDB08276 | C00157 | Glycerophospholipids |
| PC aa C40:2 | PC(20:1(11Z)/20:1(1Z)) | PC(20:1/20:1),                                                                                                                                                                                                                                                                                                                    | HMDB08308 | C00157 | Glycerophospholipids |
| PC aa C40:3 |                        |                                                                                                                                                                                                                                                                                                                                   |           |        |                      |

Supplement table 1

|             |                               |                                                                                                                                                                                                                                                                                                                              |           |        |                      |
|-------------|-------------------------------|------------------------------------------------------------------------------------------------------------------------------------------------------------------------------------------------------------------------------------------------------------------------------------------------------------------------------|-----------|--------|----------------------|
|             |                               | adrenoyl-sn-glycero-3-phosphocholine, GPCho(18:0/22:4), GPCho(18:0/22:4n6), GPCho(18:0/22:4w6), GPCho(40:4), Lecithin, PC aa C40:4, PC(18:0/22:4), PC(18:0/22:4n6), PC(18:0/22:4w6), PC(40:4), Phosphatidylcholine(18:0/22:4), Phosphatidylcholine(18:0/22:4n6), Phosphatidylcholine(18:0/22:4w6), Phosphatidylcholine(40:4) |           |        |                      |
|             | PC(18:0/22:4(7Z,10Z,13Z,16Z)) | 1-Arachidonoyl-2-arachidonoyl-sn-glycero-3-phosphocholine,                                                                                                                                                                                                                                                                   |           |        |                      |
|             | PC(20:0/20:4(5Z,8Z,11Z,14Z))  | GPCho(20:0/20:4),                                                                                                                                                                                                                                                                                                            |           |        |                      |
|             | PC(22:4(7Z,10Z,13Z,16Z)/18:0) | GPCho(20:0/20:4n6),                                                                                                                                                                                                                                                                                                          |           |        |                      |
|             | PC(18:0/22:4(7Z,10Z,13Z,16Z)) | GPCho(20:0/20:4w6), GPCho(40:4),                                                                                                                                                                                                                                                                                             | HMDB08054 | C00157 | Glycerophospholipids |
|             | PC(20:0/20:4(5Z,8Z,11Z,14Z))  | Lecithin, PC aa C40:4,                                                                                                                                                                                                                                                                                                       | HMDB08279 | C00157 | Glycerophospholipids |
|             | PC(22:4(7Z,10Z,13Z,16Z)/18:0) | PC(20:0/20:4),                                                                                                                                                                                                                                                                                                               | HMDB08628 | C00157 | Glycerophospholipids |
| PC aa C40:4 |                               | PC(20:0/20:4n6),                                                                                                                                                                                                                                                                                                             | HMDB08054 | C00157 | Glycerophospholipids |
|             |                               |                                                                                                                                                                                                                                                                                                                              | HMDB08279 | C00157 | Glycerophospholipids |
|             |                               |                                                                                                                                                                                                                                                                                                                              | HMDB08628 | C00157 | Glycerophospholipids |

Supplement table 1

|             |                                   |                                                                                                                                                                                                                                                                                                                                                                                          |           |        |                      |
|-------------|-----------------------------------|------------------------------------------------------------------------------------------------------------------------------------------------------------------------------------------------------------------------------------------------------------------------------------------------------------------------------------------------------------------------------------------|-----------|--------|----------------------|
|             |                                   | docosapentaenoyl-sn-glycero-3-phosphocholine, 1-Stearoyl-2- <del>osbondoyl</del> -sn-glycero-3-phosphocholine, GPCho(18:0/22:5), GPCho(18:0/22:5n6), GPCho(18:0/22:5w6), GPCho(40:5), Lecithin, PC(18:0/22:5), PC(18:0/22:5n6), PC(18:0/22:5w6), PC(40:5), Phosphatidylcholine(18:0/22:5), Phosphatidylcholine(18:0/22:5n6), Phosphatidylcholine(18:0/22:5w6), Phosphatidylcholine(40:5) |           |        |                      |
|             | PC(18:0/22:5(4Z,7Z,10Z,13Z,16Z))  | 1-Stearoyl-2-                                                                                                                                                                                                                                                                                                                                                                            |           |        |                      |
|             | PC(18:0/22:5(7Z,10Z,13Z,16Z,19Z)) | docosapentaenoyl-sn-glycero-3-                                                                                                                                                                                                                                                                                                                                                           |           |        |                      |
|             | PC(18:1(9Z)/22:4(7Z,10Z,13Z,16Z)) | phosphocholine,                                                                                                                                                                                                                                                                                                                                                                          | HMDB08055 | C00157 | Glycerophospholipids |
|             | PC(18:0/22:5(4Z,7Z,10Z,13Z,16Z))  | GPCho(18:0/22:5),                                                                                                                                                                                                                                                                                                                                                                        | HMDB08056 | C00157 | Glycerophospholipids |
|             | PC(18:0/22:5(7Z,10Z,13Z,16Z,19Z)) | GPCho(18:0/22:5n3),                                                                                                                                                                                                                                                                                                                                                                      | HMDB08120 | C00157 | Glycerophospholipids |
|             | PC(18:1(9Z)/22:4(7Z,10Z,13Z,16Z)) | GPCho(18:0/22:5w3),                                                                                                                                                                                                                                                                                                                                                                      | HMDB08055 | C00157 | Glycerophospholipids |
|             |                                   | , GPCho(40:5),                                                                                                                                                                                                                                                                                                                                                                           | HMDB08056 | C00157 | Glycerophospholipids |
| PC aa C40:5 |                                   | Lecithin,                                                                                                                                                                                                                                                                                                                                                                                | HMDB08120 | C00157 | Glycerophospholipids |

Supplement table 1

|             |                                        |                                                                                                                                                                                                                                                                                                                                     |           |        |                      |
|-------------|----------------------------------------|-------------------------------------------------------------------------------------------------------------------------------------------------------------------------------------------------------------------------------------------------------------------------------------------------------------------------------------|-----------|--------|----------------------|
|             |                                        | docosahexaenoyl-sn-glycero-3-phosphocholine, GPCho(18:0/22:6), GPCho(18:0/22:6n3), GPCho(18:0/22:6w3), GPCho(40:6), Lecithin, PC aa C40:6, PC(18:0/22:6), PC(18:0/22:6n3), PC(18:0/22:6w3), PC(40:6), Phosphatidylcholine(18:0/22:6), Phosphatidylcholine(18:0/22:6n3), Phosphatidylcholine(18:0/22:6w3), Phosphatidylcholine(40:6) |           |        |                      |
|             | PC(18:0/22:6(4Z,7Z,10Z,13Z,16Z,19Z))   | 1-Vaccenoyl-2-                                                                                                                                                                                                                                                                                                                      |           |        |                      |
|             | PC(18:1(11Z)/22:5(7Z,10Z,13Z,16Z,19Z)) | docosapentaenoyl-sn-glycero-3-                                                                                                                                                                                                                                                                                                      |           |        |                      |
|             | PC(18:1(9Z)/22:5(7Z,10Z,13Z,16Z,19Z))  | phosphocholine, GPCho(18:1/22:5),                                                                                                                                                                                                                                                                                                   |           |        |                      |
|             | PC(18:0/22:6(4Z,7Z,10Z,13Z,16Z,19Z))   | GPCho(18:1n7/22:5n3),                                                                                                                                                                                                                                                                                                               | HMDB08057 | C00157 | Glycerophospholipids |
|             | PC(18:1(11Z)/22:5(7Z,10Z,13Z,16Z,19Z)) | GPCho(18:1w7/22:5w3), GPCho(40:6),                                                                                                                                                                                                                                                                                                  | HMDB08089 | C00157 | Glycerophospholipids |
|             | PC(18:1(9Z)/22:5(7Z,10Z,13Z,16Z,19Z))  | Lecithin, PC aa C40:6,                                                                                                                                                                                                                                                                                                              | HMDB08122 | C00157 | Glycerophospholipids |
| PC aa C40:6 |                                        |                                                                                                                                                                                                                                                                                                                                     | HMDB08057 | C00157 | Glycerophospholipids |
|             |                                        |                                                                                                                                                                                                                                                                                                                                     | HMDB08089 | C00157 | Glycerophospholipids |
|             |                                        |                                                                                                                                                                                                                                                                                                                                     | HMDB08122 | C00157 | Glycerophospholipids |

Supplement table 1

|             |               |                                                                                                                                                                                                |           |        |                      |
|-------------|---------------|------------------------------------------------------------------------------------------------------------------------------------------------------------------------------------------------|-----------|--------|----------------------|
|             |               | lignoceroyl-sn-glycero-3-phosphocholine, GPCho(18:0/24:0), GPCho(42:0), Lecithin, PC aa C42:0, PC(18:0/24:0), PC(42:0), Phosphatidylcholine(18:0/24:0), Phosphatidylcholine(42:0)              |           |        |                      |
|             |               | 1-Arachidonyl-2-behenoyl-sn-glycero-3-phosphocholine, GPCho(20:0/22:0), GPCho(42:0), Lecithin, PC aa C42:0, PC(20:0/22:0), PC(42:0), Phosphatidylcholine(20:0/22:0), Phosphatidylcholine(42:0) |           |        |                      |
|             | PC(18:0/24:0) | Phosphatidylcholine(42:0)                                                                                                                                                                      | HMDB08058 | C00157 | Glycerophospholipids |
|             | PC(20:0/22:0) | 1-Behenoyl-2-arachidonyl-sn-glycero-3-phosphocholine,                                                                                                                                          | HMDB08282 | C00157 | Glycerophospholipids |
|             | PC(22:0/20:0) | GPCho(22:0/20:0),                                                                                                                                                                              | HMDB08537 | C00157 | Glycerophospholipids |
|             | PC(24:0/18:0) | GPCho(42:0),                                                                                                                                                                                   | HMDB08760 | C00157 | Glycerophospholipids |
|             | PC(18:0/24:0) | Lecithin, PC aa C42:0,                                                                                                                                                                         | HMDB08058 | C00157 | Glycerophospholipids |
|             | PC(20:0/22:0) | PC(20:0/22:0),                                                                                                                                                                                 | HMDB08282 | C00157 | Glycerophospholipids |
|             | PC(22:0/20:0) | PC(42:0),                                                                                                                                                                                      | HMDB08537 | C00157 | Glycerophospholipids |
| PC aa C42:0 | PC(24:0/18:0) | Phosphatidylcholine(20:0/22:0),                                                                                                                                                                | HMDB08760 | C00157 | Glycerophospholipids |

Supplement table 1

|             |                    |                                                                                                                                                                                                                                                                                                                               |           |        |                      |
|-------------|--------------------|-------------------------------------------------------------------------------------------------------------------------------------------------------------------------------------------------------------------------------------------------------------------------------------------------------------------------------|-----------|--------|----------------------|
|             |                    | nervonoyl-sn-glycero-3-phosphocholine, GPCho(18:0/24:1), GPCho(18:0/24:1n9), GPCho(18:0/24:1w9), GPCho(42:1), Lecithin, PC aa C42:1, PC(18:0/24:1), PC(18:0/24:1n9), PC(18:0/24:1w9), PC(42:1), Phosphatidylcholine(18:0/24:1), Phosphatidylcholine(18:0/24:1n9), Phosphatidylcholine(18:0/24:1w9), Phosphatidylcholine(42:1) |           |        |                      |
|             | PC(18:0/24:1(15Z)) | glycero-3-                                                                                                                                                                                                                                                                                                                    | HMDB08059 | C00157 | Glycerophospholipids |
|             | PC(18:1(9Z)/24:0)  | phosphocholine,                                                                                                                                                                                                                                                                                                               | HMDB08124 | C00157 | Glycerophospholipids |
|             | PC(20:0/22:1(13Z)) | GPCho(18:1/24:0),                                                                                                                                                                                                                                                                                                             | HMDB08283 | C00157 | Glycerophospholipids |
|             | PC(22:0/20:1(11Z)) | GPCho(18:1n9/24:0),                                                                                                                                                                                                                                                                                                           | HMDB08538 | C00157 | Glycerophospholipids |
|             | PC(24:0/18:1(9Z))  | GPCho(18:1w9/24:0)                                                                                                                                                                                                                                                                                                            | HMDB08762 | C00157 | Glycerophospholipids |
|             | PC(18:0/24:1(15Z)) | , GPCho(42:1),                                                                                                                                                                                                                                                                                                                | HMDB08059 | C00157 | Glycerophospholipids |
|             | PC(18:1(9Z)/24:0)  | Lecithin, PC aa                                                                                                                                                                                                                                                                                                               | HMDB08124 | C00157 | Glycerophospholipids |
|             | PC(20:0/22:1(13Z)) | C42:1,                                                                                                                                                                                                                                                                                                                        | HMDB08283 | C00157 | Glycerophospholipids |
|             | PC(22:0/20:1(11Z)) | PC(18:1/24:0),                                                                                                                                                                                                                                                                                                                | HMDB08538 | C00157 | Glycerophospholipids |
| PC aa C42:1 | PC(24:0/18:1(9Z))  | PC(18:1n9/24:0),                                                                                                                                                                                                                                                                                                              | HMDB08762 | C00157 | Glycerophospholipids |
| PC aa C42:2 | PC aa C42:2        | 1-Erucoyl-2-eicosenoyl-                                                                                                                                                                                                                                                                                                       | HMDB08570 |        | Glycerophospholipids |
| PC aa C42:4 | PC aa C42:4        | 1-Erucoyl-2-meadoyl-                                                                                                                                                                                                                                                                                                          | HMDB08572 |        | Glycerophospholipids |

Supplement table 1

|             |                                                                                   |                                                                                                                                                                                                                                                                                                                                                                                                                                                                                                                               |                                   |                             |                                                         |
|-------------|-----------------------------------------------------------------------------------|-------------------------------------------------------------------------------------------------------------------------------------------------------------------------------------------------------------------------------------------------------------------------------------------------------------------------------------------------------------------------------------------------------------------------------------------------------------------------------------------------------------------------------|-----------------------------------|-----------------------------|---------------------------------------------------------|
| PC aa C42:5 | <p>PC(20:0/22:5(7Z,10Z,13Z,16Z,19Z))</p> <p>PC(20:0/22:5(7Z,10Z,13Z,16Z,19Z))</p> | <p>docosapentaenoyl-sn-glycero-3-phosphocholine, GPCho(20:0/22:5), GPCho(20:0/22:5n3), GPCho(20:0/22:5w3), GPCho(42:5), Lecithin, PC aa C42:5, PC(20:0/22:5), PC(20:0/22:5n3), PC(20:0/22:5w3), PC(42:5), Phosphatidylcholine(20:0/22:5), Phosphatidylcholine(20:0/22:5n3), Phosphatidylcholine(20:0/22:5w3), Phosphatidylcholine(42:5)</p> <p>1-Arachidonyl-2-docosapentaenoyl-sn-glycero-3-phosphocholine, GPCho(20:0/22:5), GPCho(20:0/22:5n3), GPCho(20:0/22:5w3), GPCho(42:5), Lecithin, PC aa C42:5, PC(20:0/22:5),</p> | <p>HMDB08287</p> <p>HMDB08287</p> | <p>C00157</p> <p>C00157</p> | <p>Glycerophospholipids</p> <p>Glycerophospholipids</p> |
|-------------|-----------------------------------------------------------------------------------|-------------------------------------------------------------------------------------------------------------------------------------------------------------------------------------------------------------------------------------------------------------------------------------------------------------------------------------------------------------------------------------------------------------------------------------------------------------------------------------------------------------------------------|-----------------------------------|-----------------------------|---------------------------------------------------------|



Supplement table 1

|             |                                                                              |                                                                                                                                                                                                                                                                                                                                                                                                                                                                                                               |                        |                  |                                              |
|-------------|------------------------------------------------------------------------------|---------------------------------------------------------------------------------------------------------------------------------------------------------------------------------------------------------------------------------------------------------------------------------------------------------------------------------------------------------------------------------------------------------------------------------------------------------------------------------------------------------------|------------------------|------------------|----------------------------------------------|
| PC aa C42:6 | PC(20:0/22:6(4Z,7Z,10Z,13Z,16Z,19Z))<br>PC(20:0/22:6(4Z,7Z,10Z,13Z,16Z,19Z)) | docosahexaenoyl-sn-glycero-3-phosphocholine, GPCho(20:0/22:6), GPCho(20:0/22:6n3), GPCho(20:0/22:6w3), GPCho(42:6), Lecithin, PC aa C42:6, PC(20:0/22:6), PC(20:0/22:6n3), PC(20:0/22:6w3), PC(42:6), Phosphatidylcholine(20:0/22:6), Phosphatidylcholine(20:0/22:6n3), Phosphatidylcholine(20:0/22:6w3), Phosphatidylcholine(42:6) 1-Arachidonyl-2-docosahexaenoyl-sn-glycero-3-phosphocholine, GPCho(20:0/22:6), GPCho(20:0/22:6n3), GPCho(20:0/22:6w3), GPCho(42:6), Lecithin, PC aa C42:6, PC(20:0/22:6), | HMDB08288<br>HMDB08288 | C00157<br>C00157 | Glycerophospholipids<br>Glycerophospholipids |
|-------------|------------------------------------------------------------------------------|---------------------------------------------------------------------------------------------------------------------------------------------------------------------------------------------------------------------------------------------------------------------------------------------------------------------------------------------------------------------------------------------------------------------------------------------------------------------------------------------------------------|------------------------|------------------|----------------------------------------------|

Supplement table 1

|             |                                    |                                                                                                                                                                                                                                                                                                                                                                                                                                                                                                              |                        |  |                                              |
|-------------|------------------------------------|--------------------------------------------------------------------------------------------------------------------------------------------------------------------------------------------------------------------------------------------------------------------------------------------------------------------------------------------------------------------------------------------------------------------------------------------------------------------------------------------------------------|------------------------|--|----------------------------------------------|
| PC ae C30:0 | PC(o-14:0/16:0)<br>PC(o-14:0/16:0) | 1-Myristyl-2-palmitoyl-<br>sn-glycero-3-<br>phosphocholine,<br>GPCho(14:0/16:0),<br>GPCho(30:0),<br>Lecithin, PC ae<br>C30:0,<br>PC(14:0/16:0),<br>PC(30:0), PC(O-<br>30:0),<br>Phosphatidylcholine(<br>14:0/16:0),<br>Phosphatidylcholine(<br>30:0)<br>1-Myristyl-2-palmitoyl-<br>sn-glycero-3-<br>phosphocholine,<br>GPCho(14:0/16:0),<br>GPCho(30:0),<br>Lecithin, PC ae<br>C30:0,<br>PC(14:0/16:0),<br>PC(30:0), PC(O-<br>30:0),<br>Phosphatidylcholine(<br>14:0/16:0),<br>Phosphatidylcholine(<br>30:0) | HMDB13341<br>HMDB13341 |  | Glycerophospholipids<br>Glycerophospholipids |
|-------------|------------------------------------|--------------------------------------------------------------------------------------------------------------------------------------------------------------------------------------------------------------------------------------------------------------------------------------------------------------------------------------------------------------------------------------------------------------------------------------------------------------------------------------------------------------|------------------------|--|----------------------------------------------|

Supplement table 1

|             |                                            |                                                                                                                                                                                                                                                                                                                                                                                                                                                                                                                 |                        |  |                                              |
|-------------|--------------------------------------------|-----------------------------------------------------------------------------------------------------------------------------------------------------------------------------------------------------------------------------------------------------------------------------------------------------------------------------------------------------------------------------------------------------------------------------------------------------------------------------------------------------------------|------------------------|--|----------------------------------------------|
|             |                                            | <p>palmitoleoyl-sn-glycero-3-phosphocholine, GPCho(14:0/16:1), GPCho(14:0/16:1n7), GPCho(14:0/16:1w7), GPCho(30:1), Lecithin, PC ae C30:1, PC(14:0/16:1), PC(14:0/16:1n7), PC(14:0/16:1w7), PC(30:1), PC(O-30:1), Phosphatidylcholine(14:0/16:1), Phosphatidylcholine(14:0/16:1n7), Phosphatidylcholine(14:0/16:1w7), Phosphatidylcholine(30:1)</p> <p>1-Myristyl-2-palmitoleoyl-sn-glycero-3-phosphocholine, GPCho(14:0/16:1), GPCho(14:0/16:1n7), GPCho(14:0/16:1w7), GPCho(30:1), Lecithin, PC ae C30:1,</p> |                        |  |                                              |
| PC ae C30:1 | PC(o-14:0/16:1(9Z))<br>PC(o-14:0/16:1(9Z)) |                                                                                                                                                                                                                                                                                                                                                                                                                                                                                                                 | HMDB13402<br>HMDB13402 |  | Glycerophospholipids<br>Glycerophospholipids |
| PC ae C30:2 | PC ae C30:2                                |                                                                                                                                                                                                                                                                                                                                                                                                                                                                                                                 |                        |  |                                              |
| PC ae C32:1 | PC ae C32:1                                |                                                                                                                                                                                                                                                                                                                                                                                                                                                                                                                 |                        |  |                                              |
| PC ae C32:2 | PC ae C32:2                                |                                                                                                                                                                                                                                                                                                                                                                                                                                                                                                                 |                        |  |                                              |

Supplement table 1

|             |                                    |                                                                                                                                                                                                         |                        |  |                                              |
|-------------|------------------------------------|---------------------------------------------------------------------------------------------------------------------------------------------------------------------------------------------------------|------------------------|--|----------------------------------------------|
|             |                                    | 1-Palmityl-2-stearoyl-sn-glycero-3-phosphocholine, GPCho(16:0/18:0), GPCho(34:0), Lecithin, PC ae C34:0, PC(16:0/18:0), PC(34:0), PC(O-34:0), Phosphatidylcholine(16:0/18:0), Phosphatidylcholine(34:0) |                        |  |                                              |
|             |                                    | 1-Palmityl-2-stearoyl-sn-glycero-3-phosphocholine, GPCho(16:0/18:0), GPCho(34:0), Lecithin, PC ae C34:0, PC(16:0/18:0), PC(34:0), PC(O-34:0), Phosphatidylcholine(16:0/18:0), Phosphatidylcholine(34:0) |                        |  |                                              |
| PC ae C34:0 | PC(o-16:0/18:0)<br>PC(o-16:0/18:0) | Phosphatidylcholine(34:0)                                                                                                                                                                               | HMDB13405<br>HMDB13405 |  | Glycerophospholipids<br>Glycerophospholipids |
| PC ae C34:1 | PC ae C34:1                        |                                                                                                                                                                                                         |                        |  |                                              |

Supplement table 1

|             |                                                    |                                                                                                                                                                                                                                                                                                                                                                                                                                                                                                                               |                        |  |                                              |
|-------------|----------------------------------------------------|-------------------------------------------------------------------------------------------------------------------------------------------------------------------------------------------------------------------------------------------------------------------------------------------------------------------------------------------------------------------------------------------------------------------------------------------------------------------------------------------------------------------------------|------------------------|--|----------------------------------------------|
| PC ae C34:2 | PC(O-16:0/18:2(9Z,12Z))<br>PC(O-16:0/18:2(9Z,12Z)) | 12Z-octadecadienoyl)-sn-glycero-3-phosphocholine, 2-(9Z, 12Z-Octadecadienoyl)-1-hexadecyl-sn-glycero-3-phosphocholine, PC ae C34:2, PC(16:0e/18:2(9Z, 12Z)), PC(O-34:2), [(2R)-3-hexadecoxy-2-[(9Z, 12Z)-octadeca-9, 12-dienoyl]oxypropyl] 2-trimethylazaniumylethyl phosphate<br>1-Hexadecyl-2-(9Z, 12Z-octadecadienoyl)-sn-glycero-3-phosphocholine, 2-(9Z, 12Z-Octadecadienoyl)-1-hexadecyl-sn-glycero-3-phosphocholine, PC ae C34:2, PC(16:0e/18:2(9Z, 12Z)), PC(O-34:2), [(2R)-3-hexadecoxy-2-[(9Z, 12Z)-octadeca-9, 12- | HMDB11151<br>HMDB11151 |  | Glycerophospholipids<br>Glycerophospholipids |
|-------------|----------------------------------------------------|-------------------------------------------------------------------------------------------------------------------------------------------------------------------------------------------------------------------------------------------------------------------------------------------------------------------------------------------------------------------------------------------------------------------------------------------------------------------------------------------------------------------------------|------------------------|--|----------------------------------------------|

Supplement table 1

|             |                                                             |                                                                                                                                                                                                                                                                                                                                                                                                                                                                                                                                                                                                                                                                             |                                 |  |                                                       |
|-------------|-------------------------------------------------------------|-----------------------------------------------------------------------------------------------------------------------------------------------------------------------------------------------------------------------------------------------------------------------------------------------------------------------------------------------------------------------------------------------------------------------------------------------------------------------------------------------------------------------------------------------------------------------------------------------------------------------------------------------------------------------------|---------------------------------|--|-------------------------------------------------------|
| PC ae C34:3 | <p>PC(P-16:0/18:2(9Z,12Z))<br/> PC(P-16:0/18:2(9Z,12Z))</p> | <p>linoleoyl-sn-glycero-3-phosphocholine,<br/> GPCho(16:0/18:2),<br/> GPCho(16:0/18:2n6),<br/> GPCho(16:0/18:2w6)<br/> , GPCho(34:2),<br/> Lecithin, PC aa<br/> C34:2,<br/> PC(16:0/18:2),<br/> PC(16:0/18:2n6),<br/> PC(16:0/18:2w6),<br/> PC(34:2),<br/> Phosphatidylcholine(16:0/18:2),<br/> Phosphatidylcholine(16:0/18:2n6),<br/> Phosphatidylcholine(16:0/18:2w6),<br/> Phosphatidylcholine(34:2)<br/> 1-(1-Enyl-palmitoyl)-2-linoleoyl-sn-glycero-3-phosphocholine,<br/> GPCho(16:0/18:2),<br/> GPCho(16:0/18:2n6),<br/> GPCho(16:0/18:2w6)<br/> , GPCho(34:2),<br/> Lecithin, PC aa<br/> C34:2,<br/> PC(16:0/18:2),<br/> PC(16:0/18:2n6),<br/> PC(16:0/18:2w6),</p> | <p>HMDB11211<br/> HMDB11211</p> |  | <p>Glycerophospholipids<br/> Glycerophospholipids</p> |
|-------------|-------------------------------------------------------------|-----------------------------------------------------------------------------------------------------------------------------------------------------------------------------------------------------------------------------------------------------------------------------------------------------------------------------------------------------------------------------------------------------------------------------------------------------------------------------------------------------------------------------------------------------------------------------------------------------------------------------------------------------------------------------|---------------------------------|--|-------------------------------------------------------|

Supplement table 1

|             |                 |                                                                                                                                                                                                                                                                                                                                                                                                         |           |  |                      |
|-------------|-----------------|---------------------------------------------------------------------------------------------------------------------------------------------------------------------------------------------------------------------------------------------------------------------------------------------------------------------------------------------------------------------------------------------------------|-----------|--|----------------------|
|             |                 | arachidonyl-sn-glycero-3-phosphocholine, GPCho(16:0/20:0), GPCho(36:0), Lecithin, PC ae C36:0, PC(16:0/20:0), PC(36:0), PC(O-36:0), Phosphatidylcholine(16:0/20:0), Phosphatidylcholine(36:0)<br>1-Stearyl-2-stearoyl-sn-glycero-3-phosphocholine, GPCho(18:0/18:0), GPCho(36:0), Lecithin, PC ae C36:0, PC(18:0/18:0), PC(36:0), PC(O-36:0), Phosphatidylcholine(18:0/18:0), Phosphatidylcholine(36:0) |           |  |                      |
|             | PC(o-16:0/20:0) | 1-Palmityl-2-                                                                                                                                                                                                                                                                                                                                                                                           | HMDB13406 |  | Glycerophospholipids |
|             | PC(o-18:0/18:0) | arachidonyl-sn-                                                                                                                                                                                                                                                                                                                                                                                         | HMDB13417 |  | Glycerophospholipids |
|             | PC(o-16:0/20:0) | glycero-3-                                                                                                                                                                                                                                                                                                                                                                                              | HMDB13406 |  | Glycerophospholipids |
| PC ae C36:0 | PC(o-18:0/18:0) | phosphocholine,                                                                                                                                                                                                                                                                                                                                                                                         | HMDB13417 |  | Glycerophospholipids |
| PC ae C36:1 | PC ae C36:1     | 1-Oleyl-2-stearoyl-sn-                                                                                                                                                                                                                                                                                                                                                                                  | HMDB13427 |  | Glycerophospholipids |

Supplement table 1

|             |                                            |                                                                                                                                                                                                                                                                                                                            |                        |  |                                              |
|-------------|--------------------------------------------|----------------------------------------------------------------------------------------------------------------------------------------------------------------------------------------------------------------------------------------------------------------------------------------------------------------------------|------------------------|--|----------------------------------------------|
|             |                                            | oleoyl-sn-glycero-3-phosphocholine, GPCho(18:0/18:1), GPCho(18:0/18:1n9), GPCho(18:0/18:1w9), GPCho(36:1), Lecithin, PC aa C36:1, PC(18:0/18:1), PC(18:0/18:1n9), PC(18:0/18:1w9), PC(36:1), Phosphatidylcholine(18:0/18:1), Phosphatidylcholine(18:0/18:1n9), Phosphatidylcholine(18:0/18:1w9), Phosphatidylcholine(36:1) |                        |  |                                              |
| PC ae C36:2 | PC(P-18:0/18:1(9Z))<br>PC(P-18:0/18:1(9Z)) | 1-(1-Enyl-stearoyl)-2-oleoyl-sn-glycero-3-phosphocholine, GPCho(18:0/18:1), GPCho(18:0/18:1n9), GPCho(18:0/18:1w9), GPCho(36:1), Lecithin, PC aa C36:1, PC(18:0/18:1), PC(18:0/18:1n9), PC(18:0/18:1w9),                                                                                                                   | HMDB11243<br>HMDB11243 |  | Glycerophospholipids<br>Glycerophospholipids |
| PC ae C36:3 | PC ae C36:3                                | 1-Oleoyl-2-linoleoyl-sn-                                                                                                                                                                                                                                                                                                   | HMDB13429              |  | Glycerophospholipids                         |
| PC ae C36:4 | PC ae C36:4                                | 1-Linoleyl 2-linoleoyl-s                                                                                                                                                                                                                                                                                                   | HMDB13435              |  | Glycerophospholipids                         |



Supplement table 1

|             |                                                                  |                                                                                                          |                        |  |                                              |
|-------------|------------------------------------------------------------------|----------------------------------------------------------------------------------------------------------|------------------------|--|----------------------------------------------|
| PC ae C36:5 | PC(P-16:0/20:4(5Z,8Z,11Z,14Z))<br>PC(P-16:0/20:4(5Z,8Z,11Z,14Z)) | Phosphatidylcholine(dm16:0/20:4(5Z, 8Z, 11Z, 14Z))<br>Phosphatidylcholine(dm16:0/20:4(5Z, 8Z, 11Z, 14Z)) | HMDB11220<br>HMDB11220 |  | Glycerophospholipids<br>Glycerophospholipids |
|-------------|------------------------------------------------------------------|----------------------------------------------------------------------------------------------------------|------------------------|--|----------------------------------------------|

Supplement table 1

|             |                                                                          |                                                                                                                                                                                                                                                                                                                                                                                                         |                                                  |  |                                                                                              |
|-------------|--------------------------------------------------------------------------|---------------------------------------------------------------------------------------------------------------------------------------------------------------------------------------------------------------------------------------------------------------------------------------------------------------------------------------------------------------------------------------------------------|--------------------------------------------------|--|----------------------------------------------------------------------------------------------|
|             |                                                                          | behenoyl-sn-glycero-3-phosphocholine, GPCho(16:0/22:0), GPCho(38:0), Lecithin, PC ae C38:0, PC(16:0/22:0), PC(38:0), PC(O-38:0), Phosphatidylcholine(16:0/22:0), Phosphatidylcholine(38:0)<br>1-Stearyl-2-arachidonyl-sn-glycero-3-phosphocholine, GPCho(18:0/20:0), GPCho(38:0), Lecithin, PC ae C38:0, PC(18:0/20:0), PC(38:0), PC(O-38:0), Phosphatidylcholine(18:0/20:0), Phosphatidylcholine(38:0) |                                                  |  |                                                                                              |
| PC ae C38:0 | PC(o-16:0/22:0)<br>PC(o-18:0/20:0)<br>PC(o-16:0/22:0)<br>PC(o-18:0/20:0) | 1-Palmityl-2-behenoyl-sn-glycero-3-phosphocholine, GPCho(16:0/22:0),                                                                                                                                                                                                                                                                                                                                    | HMDB13408<br>HMDB13419<br>HMDB13408<br>HMDB13419 |  | Glycerophospholipids<br>Glycerophospholipids<br>Glycerophospholipids<br>Glycerophospholipids |
| PC ae C38:1 | PC ae C38:1                                                              | 1-Oleyl-2-arachidonyl-                                                                                                                                                                                                                                                                                                                                                                                  | HMDB13430                                        |  | Glycerophospholipids                                                                         |
| PC ae C38:2 | PC ae C38:2                                                              | 1-Oleyl-2-eicosenoyl-                                                                                                                                                                                                                                                                                                                                                                                   | HMDB13431                                        |  | Glycerophospholipids                                                                         |
| PC ae C38:3 | PC ae C38:3                                                              | 1-Arachidyl-2-g-linole-                                                                                                                                                                                                                                                                                                                                                                                 | HMDB13439                                        |  | Glycerophospholipids                                                                         |

Supplement table 1

|             |                                                                    |                                                                                                                                                                                                                                                                                                                                                                                                                                                                                                                                               |                        |  |                                              |
|-------------|--------------------------------------------------------------------|-----------------------------------------------------------------------------------------------------------------------------------------------------------------------------------------------------------------------------------------------------------------------------------------------------------------------------------------------------------------------------------------------------------------------------------------------------------------------------------------------------------------------------------------------|------------------------|--|----------------------------------------------|
| PC ae C38:4 | PC(o-18:0/20:4(8Z,11Z,14Z,17Z))<br>PC(o-18:0/20:4(8Z,11Z,14Z,17Z)) | 1-Stearyl-2-eicsoatetraenoyl-sn-glycero-3-phosphocholine, 1-Stearyl-2-eicsoic acid,<br>GPCho(18:0/20:4),<br>GPCho(18:0/20:4n3),<br>GPCho(18:0/20:4w3),<br>GPCho(38:4),<br>Lecithin, PC ae C38:4,<br>PC(18:0/20:4),<br>PC(18:0/20:4n3),<br>PC(18:0/20:4w3),<br>PC(38:4), PC(O-38:4),<br>Phosphatidylcholine(18:0/20:4),<br>Phosphatidylcholine(18:0/20:4n3),<br>Phosphatidylcholine(18:0/20:4w3),<br>Phosphatidylcholine(38:4)<br>1-Stearyl-2-eicsoate,<br>1-Stearyl-2-eicsoatetraenoyl-sn-glycero-3-phosphocholine, 1-Stearyl-2-eicsoic acid, | HMDB13420<br>HMDB13420 |  | Glycerophospholipids<br>Glycerophospholipids |
|-------------|--------------------------------------------------------------------|-----------------------------------------------------------------------------------------------------------------------------------------------------------------------------------------------------------------------------------------------------------------------------------------------------------------------------------------------------------------------------------------------------------------------------------------------------------------------------------------------------------------------------------------------|------------------------|--|----------------------------------------------|

Supplement table 1

|             |                                                                            |                                                                                                                                                                                                                                                                                                                                                                                                                                                                                                                       |                        |  |                                              |
|-------------|----------------------------------------------------------------------------|-----------------------------------------------------------------------------------------------------------------------------------------------------------------------------------------------------------------------------------------------------------------------------------------------------------------------------------------------------------------------------------------------------------------------------------------------------------------------------------------------------------------------|------------------------|--|----------------------------------------------|
| PC ae C38:5 | PC(o-18:1(9Z)/20:4(8Z,11Z,14Z,17Z))<br>PC(o-18:1(9Z)/20:4(8Z,11Z,14Z,17Z)) | Oleyl-2-eicsoatetraenoyl-sn-glycero-3-phosphocholine, 1-Oleyl-2-eicsoic acid, GPCho(18:1/20:4), GPCho(18:1n9/20:4n3), GPCho(18:1w9/20:4w3), GPCho(38:5), Lecithin, PC ae C38:5, PC(18:1/20:4), PC(18:1n9/20:4n3), PC(18:1w9/20:4w3), PC(38:5), PC(O-38:5), Phosphatidylcholine(18:1/20:4), Phosphatidylcholine(18:1n9/20:4n3), Phosphatidylcholine(18:1w9/20:4w3), Phosphatidylcholine(38:5)<br>1-Oleyl-2-eicsoate, 1-Oleyl-2-eicsoatetraenoyl-sn-glycero-3-phosphocholine, 1-Oleyl-2-eicsoic acid, GPCho(18:1/20:4), | HMDB13432<br>HMDB13432 |  | Glycerophospholipids<br>Glycerophospholipids |
|-------------|----------------------------------------------------------------------------|-----------------------------------------------------------------------------------------------------------------------------------------------------------------------------------------------------------------------------------------------------------------------------------------------------------------------------------------------------------------------------------------------------------------------------------------------------------------------------------------------------------------------|------------------------|--|----------------------------------------------|

Supplement table 1

|             |                                                                                             |                                                                                                                                                                                                                                                                                                                                                                                                                                                                                                                       |                                   |  |                                                         |
|-------------|---------------------------------------------------------------------------------------------|-----------------------------------------------------------------------------------------------------------------------------------------------------------------------------------------------------------------------------------------------------------------------------------------------------------------------------------------------------------------------------------------------------------------------------------------------------------------------------------------------------------------------|-----------------------------------|--|---------------------------------------------------------|
| PC ae C38:6 | <p>PC(o-16:0/22:6(4Z,7Z,10Z,13Z,16Z,19Z))</p> <p>PC(o-16:0/22:6(4Z,7Z,10Z,13Z,16Z,19Z))</p> | <p>docosahexaenoyl-sn-glycero-3-phosphocholine, GPCho(16:0/22:6), GPCho(16:0/22:6n3), GPCho(16:0/22:6w3), GPCho(38:6), Lecithin, PC ae C38:6, PC(16:0/22:6), PC(16:0/22:6n3), PC(16:0/22:6w3), PC(38:6), PC(O-38:6), Phosphatidylcholine(16:0/22:6), Phosphatidylcholine(16:0/22:6n3), Phosphatidylcholine(16:0/22:6w3), Phosphatidylcholine(38:6)</p> <p>1-Palmityl-2-docosahexaenoyl-sn-glycero-3-phosphocholine, GPCho(16:0/22:6), GPCho(16:0/22:6n3), GPCho(16:0/22:6w3), GPCho(38:6), Lecithin, PC ae C38:6,</p> | <p>HMDB13409</p> <p>HMDB13409</p> |  | <p>Glycerophospholipids</p> <p>Glycerophospholipids</p> |
|-------------|---------------------------------------------------------------------------------------------|-----------------------------------------------------------------------------------------------------------------------------------------------------------------------------------------------------------------------------------------------------------------------------------------------------------------------------------------------------------------------------------------------------------------------------------------------------------------------------------------------------------------------|-----------------------------------|--|---------------------------------------------------------|

Supplement table 1

|             |                                    |                                                                                                                                                                                                        |                        |  |                                              |
|-------------|------------------------------------|--------------------------------------------------------------------------------------------------------------------------------------------------------------------------------------------------------|------------------------|--|----------------------------------------------|
|             |                                    | 1-Stearyl-2-behenoyl-sn-glycero-3-phosphocholine, GPCho(18:0/22:0), GPCho(40:0), Lecithin, PC ae C40:0, PC(18:0/22:0), PC(40:0), PC(O-40:0), Phosphatidylcholine(18:0/22:0), Phosphatidylcholine(40:0) |                        |  |                                              |
|             |                                    | 1-Stearyl-2-behenoyl-sn-glycero-3-phosphocholine, GPCho(18:0/22:0), GPCho(40:0), Lecithin, PC ae C40:0, PC(18:0/22:0), PC(40:0), PC(O-40:0), Phosphatidylcholine(18:0/22:0), Phosphatidylcholine(40:0) |                        |  |                                              |
| PC ae C40:0 | PC(o-18:0/22:0)<br>PC(o-18:0/22:0) | Phosphatidylcholine(40:0)                                                                                                                                                                              | HMDB13421<br>HMDB13421 |  | Glycerophospholipids<br>Glycerophospholipids |
| PC ae C40:1 | PC ae C40:1                        | 1-Oleyl-2-behenoyl-sn-glycero-3-phosphocholine                                                                                                                                                         | HMDB13433              |  | Glycerophospholipids                         |
| PC ae C40:2 | PC ae C40:2                        | 1-Linoleyl-2-behenoyl-sn-glycero-3-phosphocholine                                                                                                                                                      | HMDB13437              |  | Glycerophospholipids                         |
| PC ae C40:3 | PC ae C40:3                        | 1-Behenyl-2-g-linolenyl-sn-glycero-3-phosphocholine                                                                                                                                                    | HMDB13445              |  | Glycerophospholipids                         |
| PC ae C40:4 | PC ae C40:4                        | 1-Arachidyl-2-eicsoatyl-sn-glycero-3-phosphocholine                                                                                                                                                    | HMDB13442              |  | Glycerophospholipids                         |
| PC ae C40:5 | PC ae C40:5                        | 1-Eicosenyl-2-eicsoatyl-sn-glycero-3-phosphocholine                                                                                                                                                    | HMDB13444              |  | Glycerophospholipids                         |

Supplement table 1

|             |                                                                                             |                                                                                                                                                                                                                                                                                                                                                                                                                                                                                                                      |                                   |  |                                                         |
|-------------|---------------------------------------------------------------------------------------------|----------------------------------------------------------------------------------------------------------------------------------------------------------------------------------------------------------------------------------------------------------------------------------------------------------------------------------------------------------------------------------------------------------------------------------------------------------------------------------------------------------------------|-----------------------------------|--|---------------------------------------------------------|
| PC ae C40:6 | <p>PC(o-18:0/22:6(4Z,7Z,10Z,13Z,16Z,19Z))</p> <p>PC(o-18:0/22:6(4Z,7Z,10Z,13Z,16Z,19Z))</p> | <p>docosahexaenoyl-sn-glycero-3-phosphocholine, GPCho(18:0/22:6), GPCho(18:0/22:6n3), GPCho(18:0/22:6w3), GPCho(40:6), Lecithin, PC ae C40:6, PC(18:0/22:6), PC(18:0/22:6n3), PC(18:0/22:6w3), PC(40:6), PC(O-40:6), Phosphatidylcholine(18:0/22:6), Phosphatidylcholine(18:0/22:6n3), Phosphatidylcholine(18:0/22:6w3), Phosphatidylcholine(40:6)</p> <p>1-Stearyl-2-docosahexaenoyl-sn-glycero-3-phosphocholine, GPCho(18:0/22:6), GPCho(18:0/22:6n3), GPCho(18:0/22:6w3), GPCho(40:6), Lecithin, PC ae C40:6,</p> | <p>HMDB13422</p> <p>HMDB13422</p> |  | <p>Glycerophospholipids</p> <p>Glycerophospholipids</p> |
|-------------|---------------------------------------------------------------------------------------------|----------------------------------------------------------------------------------------------------------------------------------------------------------------------------------------------------------------------------------------------------------------------------------------------------------------------------------------------------------------------------------------------------------------------------------------------------------------------------------------------------------------------|-----------------------------------|--|---------------------------------------------------------|

Supplement table 1

|             |                                    |                                                                                                                                                                                                          |                        |  |                                              |
|-------------|------------------------------------|----------------------------------------------------------------------------------------------------------------------------------------------------------------------------------------------------------|------------------------|--|----------------------------------------------|
|             |                                    | 1-Arachidyl-2-behenoyl-sn-glycero-3-phosphocholine, GPCho(20:0/22:0), GPCho(42:0), Lecithin, PC ae C42:0, PC(20:0/22:0), PC(42:0), PC(O-42:0), Phosphatidylcholine(20:0/22:0), Phosphatidylcholine(42:0) |                        |  |                                              |
|             |                                    | 1-Arachidyl-2-behenoyl-sn-glycero-3-phosphocholine, GPCho(20:0/22:0), GPCho(42:0), Lecithin, PC ae C42:0, PC(20:0/22:0), PC(42:0), PC(O-42:0), Phosphatidylcholine(20:0/22:0), Phosphatidylcholine(42:0) |                        |  |                                              |
| PC ae C42:0 | PC(o-20:0/22:0)<br>PC(o-20:0/22:0) | Phosphatidylcholine(42:0)                                                                                                                                                                                | HMDB13443<br>HMDB13443 |  | Glycerophospholipids<br>Glycerophospholipids |
| PC ae C42:1 | PC ae C42:1                        | 1-Oleyl-2-lignoceroyl-s                                                                                                                                                                                  | HMDB13434              |  | Glycerophospholipids                         |
| PC ae C42:2 | PC ae C42:2                        | 1-Linoleyl-2-lignocero                                                                                                                                                                                   | HMDB13438              |  | Glycerophospholipids                         |
| PC ae C42:3 | PC ae C42:3                        | 1-Lignoceryl-2-a-linole                                                                                                                                                                                  | HMDB13459              |  | Glycerophospholipids                         |
| PC ae C42:4 | PC ae C42:4                        | 1-Behenyl-2-eicsoate,                                                                                                                                                                                    | HMDB13448              |  | Glycerophospholipids                         |
| PC ae C42:5 | PC ae C42:5                        | 1-Erucyl-2-eicsoate, 1                                                                                                                                                                                   | HMDB13451              |  | Glycerophospholipids                         |
| PC ae C44:3 | PC ae C44:3                        | 1-Behenyl-2-(10Z, 13Z                                                                                                                                                                                    | HMDB13449              |  | Glycerophospholipids                         |
| PC ae C44:4 | PC ae C44:4                        | 1-Erucyl-2-(10Z, 13Z,                                                                                                                                                                                    | HMDB13453              |  | Glycerophospholipids                         |



Supplement table 1

|             |                                                                                      |                                                                                                                                                                                                                                                                                                                                                                                                                                                                                                                                                                                     |                                                  |                                      |                                                                              |
|-------------|--------------------------------------------------------------------------------------|-------------------------------------------------------------------------------------------------------------------------------------------------------------------------------------------------------------------------------------------------------------------------------------------------------------------------------------------------------------------------------------------------------------------------------------------------------------------------------------------------------------------------------------------------------------------------------------|--------------------------------------------------|--------------------------------------|------------------------------------------------------------------------------|
| PC ae C44:5 | PC ae C44:5                                                                          | 1-Docosadienyl-2-(10                                                                                                                                                                                                                                                                                                                                                                                                                                                                                                                                                                | HMDB13456                                        |                                      | Glycerophospholipids                                                         |
| PC ae C44:6 | PC ae C44:6                                                                          | 1-Docosatrienyl-2-(10                                                                                                                                                                                                                                                                                                                                                                                                                                                                                                                                                               | HMDB13457                                        |                                      | Glycerophospholipids                                                         |
|             |                                                                                      | Aminoethyl)benzene,<br>1-Amino-1-<br>phenylethane, 1-<br>Fenylethylamin, 1-<br>Phenyl-1-<br>ethanamine, 1-<br>Phenylethanamine, 1-<br>Phenylethylamine, a-<br>Aminoethylbenzene,<br>a-<br>Methylbenzenemetha<br>namine, a-<br>Methylbenzylamine,<br>a-Phenethylamine, a-<br>Phenylethylamine,<br>alpha-<br>Aminoethylbenzene,<br>alpha-<br>Methylbenzenemetha<br>namine, alpha-<br>Methylbenzylamine,<br>alpha-<br>Phenethylamine,<br>alpha-<br>Phenylethylamine,<br>Sumine 2079<br>(2-<br>Aminoethyl)benzene,<br>(2-<br>Aminoethyl)polystyre<br>ne, 1-Amino-2-<br>phenylethane, 1- |                                                  |                                      |                                                                              |
| PEA         | 1-Phenylethylamine<br>2-Phenylethylamine<br>1-Phenylethylamine<br>2-Phenylethylamine |                                                                                                                                                                                                                                                                                                                                                                                                                                                                                                                                                                                     | HMDB02017<br>HMDB12275<br>HMDB02017<br>HMDB12275 | C02455<br>C05332<br>C02455<br>C05332 | Phenylmethyamines<br>Phenethylamines<br>Phenylmethyamines<br>Phenethylamines |

Supplement table 1

|     |                                    |                                                                                                                                                                                                                                                                                                                                                                                                                                                                                                                                                                                                                                                                          |                        |                  |                                                            |
|-----|------------------------------------|--------------------------------------------------------------------------------------------------------------------------------------------------------------------------------------------------------------------------------------------------------------------------------------------------------------------------------------------------------------------------------------------------------------------------------------------------------------------------------------------------------------------------------------------------------------------------------------------------------------------------------------------------------------------------|------------------------|------------------|------------------------------------------------------------|
|     |                                    | Phenylalanine, (L)-<br>Phenylalanine, (S)-(-)-<br>Phenylalanine, (S)-2-<br>amino-3-<br>phenylpropanoate,<br>(S)-2-amino-3-<br>phenylpropanoic<br>acid, (S)-2-Amino-3-<br>phenylpropionate, (S)-<br>2-Amino-3-<br>phenylpropionic acid,<br>(S)-alpha-Amino-<br>benzenepropanoate,<br>(S)-alpha-Amino-<br>benzenepropanoic<br>acid, (S)-alpha-<br>Amino-beta-<br>phenylpropionate, (S)-<br>alpha-Amino-beta-<br>phenylpropionic acid,<br>(S)-alpha-<br>Aminobenzenepropa<br>noate, (S)-alpha-<br>Aminobenzenepropa<br>noic acid, (S)-alpha-<br>Aminohydrocinnamat<br>e, (S)-alpha-<br>Aminohydrocinnamic<br>acid, (S)-<br>Phenylalanine, 3-<br>Phenyl-L-alanine,<br>alpha- |                        |                  |                                                            |
| Phe | L-Phenylalanine<br>L-Phenylalanine |                                                                                                                                                                                                                                                                                                                                                                                                                                                                                                                                                                                                                                                                          | HMDB00159<br>HMDB00159 | C00079<br>C00079 | Amino Acids and Derivatives<br>Amino Acids and Derivatives |

Supplement table 1

|           |                        |                                                                                                                                                                      |           |                             |                             |
|-----------|------------------------|----------------------------------------------------------------------------------------------------------------------------------------------------------------------|-----------|-----------------------------|-----------------------------|
| Pro       |                        | Pyrrolidinecarboxylate, (-)-2-                                                                                                                                       |           |                             |                             |
|           |                        | Pyrrolidinecarboxylic acid, (-)-Proline, (S)-(-)-Proline, (S)-(-)-Pyrrolidine-2-carboxylate, (S)-(-)-Pyrrolidine-2-carboxylic acid, (S)-2-Carboxypyrrolidine, (S)-2- |           |                             |                             |
|           |                        | Pyrralidinecarboxylate, (S)-2-                                                                                                                                       |           |                             |                             |
|           |                        | Pyrralidinecarboxylic acid, (S)-2-                                                                                                                                   |           |                             |                             |
|           |                        | Pyrrolidinecarboxylate, (S)-2-                                                                                                                                       |           |                             |                             |
|           |                        | Pyrrolidinecarboxylic acid, (S)-Proline, 2-                                                                                                                          |           |                             |                             |
|           | L-Proline              | Pyrrolidinecarboxylate, (R)-                                                                                                                                         | HMDB00162 | C00148                      | Amino Acids and Derivatives |
|           | D-Proline              | pyrrolidine-2-                                                                                                                                                       | HMDB03411 | C00763                      | Amino Acids and Derivatives |
| L-Proline | carboxylic acid, D-    | HMDB00162                                                                                                                                                            | C00148    | Amino Acids and Derivatives |                             |
| D-Proline | Prolin, D-Proline, R)- | HMDB03411                                                                                                                                                            | C00763    | Amino Acids and Derivatives |                             |

Supplement table 1

|            |            |                                                                                                                                                                 |           |        |             |
|------------|------------|-----------------------------------------------------------------------------------------------------------------------------------------------------------------|-----------|--------|-------------|
|            |            | 1, 4-Butylenediamine, 1, 4-Diaminobutane, 1, 4-Tetramethylenediamine, Butylenediamine, Putrescin, Tetramethyldiamine, Tetramethylenediamine                     |           |        |             |
|            |            | 1, 4-Butanediamine, 1, 4-Butylenediamine, 1, 4-Diaminobutane, 1, 4-Tetramethylenediamine, Butylenediamine, Putrescin, Tetramethyldiamine, Tetramethylenediamine |           |        |             |
|            |            | 1, 4-Butanediamine, 1, 4-Butylenediamine, 1, 4-Diaminobutane, 1, 4-Tetramethylenediamine, Butylenediamine, Putrescin, Tetramethyldiamine, Tetramethylenediamine |           |        |             |
| Putrescine | Putrescine | Tetramethyldiamine, Tetramethylenediamine                                                                                                                       | HMDB01414 | C00134 | Alkylamines |
|            | Putrescine | Tetramethylenediamine                                                                                                                                           | HMDB01414 | C00134 | Alkylamines |
|            | Putrescine | Tetramethylenediamine                                                                                                                                           | HMDB01414 | C00134 | Alkylamines |

Supplement table 1

|               |                                                          |                                                                                                                                                                                                                                                                                                                                                                                                                                                                                                                                                                                                                                                                                                                                                                     |                        |  |                                                            |
|---------------|----------------------------------------------------------|---------------------------------------------------------------------------------------------------------------------------------------------------------------------------------------------------------------------------------------------------------------------------------------------------------------------------------------------------------------------------------------------------------------------------------------------------------------------------------------------------------------------------------------------------------------------------------------------------------------------------------------------------------------------------------------------------------------------------------------------------------------------|------------------------|--|------------------------------------------------------------|
|               |                                                          | <p>dimethylarginine, N(G1), N(G2)-<br/>         Dimethylarginine, N, N'-Dimethylarginine, N5-<br/>         ((methylamino)(methylimino)methyl)-L-<br/>         Ornithine, N5-(N, N'-dimethylamidino)-L-<br/>         Ornithine, N5-[bis(methylamino)methylene]-L-Ornithine,<br/>         NG, N'G-Dimethyl-L-arginine, NG, N'G-dimethylarginine,<br/>         NG, NG'-dimethylarginine,<br/>         SDMA<br/>         Guanidino-N(1), N(2)-dimethylarginine,<br/>         N(G1), N(G2)-<br/>         Dimethylarginine, N, N'-Dimethylarginine, N5-<br/>         ((methylamino)(methylimino)methyl)-L-<br/>         Ornithine, N5-(N, N'-dimethylamidino)-L-<br/>         Ornithine, N5-[bis(methylamino)methylene]-L-Ornithine,<br/>         NG, N'G-Dimethyl-L-</p> |                        |  |                                                            |
| SDMA          | Symmetric dimethylarginine<br>Symmetric dimethylarginine |                                                                                                                                                                                                                                                                                                                                                                                                                                                                                                                                                                                                                                                                                                                                                                     | HMDB03334<br>HMDB03334 |  | Amino Acids and Derivatives<br>Amino Acids and Derivatives |
| SM (OH) C14:1 | SM (OH) C14:1                                            |                                                                                                                                                                                                                                                                                                                                                                                                                                                                                                                                                                                                                                                                                                                                                                     |                        |  |                                                            |
| SM (OH) C16:1 | SM (OH) C16:1                                            |                                                                                                                                                                                                                                                                                                                                                                                                                                                                                                                                                                                                                                                                                                                                                                     |                        |  |                                                            |
| SM (OH) C22:1 | SM (OH) C22:1                                            |                                                                                                                                                                                                                                                                                                                                                                                                                                                                                                                                                                                                                                                                                                                                                                     |                        |  |                                                            |

Supplement table 1

|               |                                                                            |                                                                                                                                                |                        |                  |                                |
|---------------|----------------------------------------------------------------------------|------------------------------------------------------------------------------------------------------------------------------------------------|------------------------|------------------|--------------------------------|
| SM (OH) C22:2 | SM (OH) C22:2                                                              |                                                                                                                                                |                        |                  |                                |
| SM (OH) C24:1 | SM (OH) C24:1                                                              |                                                                                                                                                |                        |                  |                                |
| SM C16:0      | SM C16:0                                                                   | C16 Sphingomyelin, N                                                                                                                           | HMDB10169              |                  | Sphingolipids                  |
| SM C16:1      | Sphingomyelin with ac                                                      |                                                                                                                                                | HMDB29216              |                  | Sphingolipids                  |
| SM C18:0      | SM C18:0                                                                   | N-(Octadecanoyl)-sph                                                                                                                           | HMDB01348              |                  | Sphingolipids                  |
|               |                                                                            | N-(11Z-Octadecenoyl)-sphing-4-enine-1-phosphocholine, SPH(d18:1/18:1(11Z)), Sphingomyelin, Sphingomyelin (d18:1/18:1(11Z))                     |                        |                  |                                |
|               | C18:1;11Z-enoyl Sphingomyelin                                              | C18:1 Sphingomyelin, N-(9Z-Octadecenoyl)-sphing-4-enine-1-phosphocholine, SPH(d18:1/18:1(11Z)), Sphingomyelin, Sphingomyelin (d18:1/18:1(11Z)) | HMDB12100<br>HMDB12101 | C00550<br>C00550 | Sphingolipids<br>Sphingolipids |
| SM C18:1      | C18:1;9Z-enoyl Sphingomyelin                                               |                                                                                                                                                |                        |                  |                                |
| SM C20:2      | SM C20:2                                                                   |                                                                                                                                                |                        |                  |                                |
| SM C22:3      | SM C22:3                                                                   |                                                                                                                                                |                        |                  |                                |
| SM C24:0      | SM C24:0                                                                   |                                                                                                                                                |                        |                  |                                |
|               |                                                                            | C24:1 Sphingomyelin, N-(15Z-Tetracosenoyl)-sphing-4-enine-1-phosphocholine                                                                     |                        |                  |                                |
|               | C24:1 Sphingomyelin, N-(15Z-Tetracosenoyl)-sphing-4-enine-1-phosphocholine |                                                                                                                                                |                        |                  |                                |
| SM C24:1      | SM(d18:1/24:1(15Z))<br>SM(d18:1/24:1(15Z))                                 |                                                                                                                                                | HMDB12107<br>HMDB12107 | C00550<br>C00550 | Sphingolipids<br>Sphingolipids |

Supplement table 1

|          |                     |                                                                                                       |           |        |               |
|----------|---------------------|-------------------------------------------------------------------------------------------------------|-----------|--------|---------------|
| SM C26:0 | SM C26:0            | N-(Hexacosanoyl)-sph                                                                                  | HMDB11698 |        | Sphingolipids |
|          |                     | C26:1<br>Sphingomyelin, N-<br>(Tricosanoyl)-sphing-<br>4-enine-1-<br>phosphocholine,<br>Sphingomyelin |           |        |               |
|          | SM(d18:0/26:1(17Z)) | C26:1<br>Sphingomyelin, N-<br>(Tricosanoyl)-sphing-<br>4-enine-1-<br>phosphocholine,                  | HMDB13461 | C00550 | Sphingolipids |
| SM C26:1 | SM(d18:0/26:1(17Z)) | Sphingomyelin                                                                                         | HMDB13461 | C00550 | Sphingolipids |

Supplement table 1

|     |                                              |                                                                                                                                                                                                                                                                                                                                                                                                                                                                                                                                      |                                                  |                                      |                                                                                                                          |
|-----|----------------------------------------------|--------------------------------------------------------------------------------------------------------------------------------------------------------------------------------------------------------------------------------------------------------------------------------------------------------------------------------------------------------------------------------------------------------------------------------------------------------------------------------------------------------------------------------------|--------------------------------------------------|--------------------------------------|--------------------------------------------------------------------------------------------------------------------------|
|     |                                              | amino-3-hydroxy-Propanoate, (S)-2-amino-3-hydroxy-Propanoic acid, (S)-2-Amino-3-hydroxypropanoate, (S)-2-Amino-3-hydroxypropanoic acid, (S)- $\alpha$ -Amino- $\beta$ -hydroxypropionate, (S)- $\alpha$ -Amino- $\beta$ -hydroxypropionic acid, (S)- $\alpha$ -Amino- $\beta$ -hydroxypropionate, (S)- $\alpha$ -Amino- $\beta$ -hydroxypropionic acid, (S)- $\beta$ -Amino-3-hydroxypropionate, (S)- $\beta$ -Amino-3-hydroxypropionic acid, (S)-Serine, 2-Amino-3-hydroxypropanoate, 2-Amino-3-hydroxypropanoic acid, 3-Hydroxy-L- |                                                  |                                      |                                                                                                                          |
| Ser | L-Serine<br>D-Serine<br>L-Serine<br>D-Serine | hydroxypropanoate,<br>hydroxypropanoic<br>acid, 3-Hydroxy-L-                                                                                                                                                                                                                                                                                                                                                                                                                                                                         | HMDB00187<br>HMDB03406<br>HMDB00187<br>HMDB03406 | C00065<br>C00740<br>C00065<br>C00740 | Amino Acids and Derivatives<br>Amino Acids and Derivatives<br>Amino Acids and Derivatives<br>Amino Acids and Derivatives |



Supplement table 1

|           |                                     |                                                                                                                                                                                                                                                                                                                                                                                                                                                                                                                  |                                     |                            |                               |
|-----------|-------------------------------------|------------------------------------------------------------------------------------------------------------------------------------------------------------------------------------------------------------------------------------------------------------------------------------------------------------------------------------------------------------------------------------------------------------------------------------------------------------------------------------------------------------------|-------------------------------------|----------------------------|-------------------------------|
| Serotonin | Serotonin<br>Serotonin<br>Serotonin | indol-5-ol, 3-(2-Aminoethyl)indol-5-ol, 3-(b-Aminoethyl)-5-hydroxyindole, 5-HT, 5-HTA, 5-Hydroxy-3-(b-aminoethyl)indole, 5-Hydroxy-tryptamine, 5-Hydroxytryptamine, 5-Hydroxytryptamine, 5-Hydroxytryptamine, Antemovis, DS substance, Enteramin, Enteramine<br>3-(2-Aminoethyl)-1H-indol-5-ol, 3-(2-Aminoethyl)indol-5-ol, 3-(b-Aminoethyl)-5-hydroxyindole, 5-HT, 5-HTA, 5-Hydroxy-3-(b-aminoethyl)indole, 5-Hydroxy-tryptamine, 5-Hydroxytryptamine, 5-Hydroxytryptamine, Antemovis, DS substance, Enteramin, | HMDB00259<br>HMDB00259<br>HMDB00259 | C00780<br>C00780<br>C00780 | Indoles<br>Indoles<br>Indoles |
|-----------|-------------------------------------|------------------------------------------------------------------------------------------------------------------------------------------------------------------------------------------------------------------------------------------------------------------------------------------------------------------------------------------------------------------------------------------------------------------------------------------------------------------------------------------------------------------|-------------------------------------|----------------------------|-------------------------------|

Supplement table 1

|            |                                        |                                                                                                                                                                                                                                                                                                                                                                                                                                                                                                                                               |                                     |                            |                                           |
|------------|----------------------------------------|-----------------------------------------------------------------------------------------------------------------------------------------------------------------------------------------------------------------------------------------------------------------------------------------------------------------------------------------------------------------------------------------------------------------------------------------------------------------------------------------------------------------------------------------------|-------------------------------------|----------------------------|-------------------------------------------|
| Spermidine | Spermidine<br>Spermidine<br>Spermidine | Triazadecane, 1, 8-Diamino-4-azaooctane, 4-Azaooctamethylenediamine, 4-Azaooctane-1, 8-diamine, Aminopropylbutandiamine, N-(3-Aminopropyl)-1, 4-butane-diamine, N-(3-Aminopropyl)-1, 4-butanediamine, N-(3-Aminopropyl)-1, 4-diamino-butane, N-(3-Aminopropyl)-1, 4-diaminobutane, N-(3-Aminopropyl)-4-aminobutylamine, N-(4-Aminobutyl)-1, 3-diaminopropane, N-(gamma-Aminopropyl)tetramethylenediamine, SPD, Spermidin, Spermidine 1, 5, 10-Triazadecane, 1, 8-Diamino-4-azaooctane, 4-Azaooctamethylenediamine, 4-Azaooctane-1, 8-diamine, | HMDB01257<br>HMDB01257<br>HMDB01257 | C00315<br>C00315<br>C00315 | Alkylamines<br>Alkylamines<br>Alkylamines |
|------------|----------------------------------------|-----------------------------------------------------------------------------------------------------------------------------------------------------------------------------------------------------------------------------------------------------------------------------------------------------------------------------------------------------------------------------------------------------------------------------------------------------------------------------------------------------------------------------------------------|-------------------------------------|----------------------------|-------------------------------------------|

Supplement table 1

|          |          |                                                                                                                                                                                                                                                                                                                                                                                                                                                                                                                                                                                                     |           |        |             |
|----------|----------|-----------------------------------------------------------------------------------------------------------------------------------------------------------------------------------------------------------------------------------------------------------------------------------------------------------------------------------------------------------------------------------------------------------------------------------------------------------------------------------------------------------------------------------------------------------------------------------------------------|-----------|--------|-------------|
|          |          | Tetraazatetradecane,<br>4, 9-Diaza-1, 12-<br>dodecanediamine, 4,<br>9-<br>Diazadodecamethyle<br>nediamine, 4, 9-<br>Diazadodecane-1, 12-<br>diamine,<br>Diaminopropyl-<br>tetramethylenediami<br>ne,<br>Diaminopropyltetram<br>ethylenediamine,<br>Gerontine,<br>Musculamine, N, N'-<br>Bis(3-aminopropyl)-<br>1, 4-Butanediamine,<br>N, N'-Bis(3-<br>aminopropyl)-1, 4-<br>tetramethylenediami<br>ne, N, N'-Bis(3-<br>aminopropyl)butane-<br>1, 4-diamine, N1, N4-<br>bis(3-aminopropyl)-1,<br>4-butanediamine,<br>Neuridine, Spermin,<br>Spermine, Spermine<br>dihydrate, Spermine<br>puriss, SPM |           |        |             |
|          | Spermine | 1, 5, 10, 14-                                                                                                                                                                                                                                                                                                                                                                                                                                                                                                                                                                                       | HMDB01256 | C00750 | Alkylamines |
|          | Spermine | Tetraazatetradecane,                                                                                                                                                                                                                                                                                                                                                                                                                                                                                                                                                                                | HMDB01256 | C00750 | Alkylamines |
| Spermine | Spermine | 4, 9-Diaza-1, 12-                                                                                                                                                                                                                                                                                                                                                                                                                                                                                                                                                                                   | HMDB01256 | C00750 | Alkylamines |

Supplement table 1

|         |         |                                                                                                                                                                                                                                                                                                                                                                                                                                                                                                                                                                                                                     |           |        |                                |
|---------|---------|---------------------------------------------------------------------------------------------------------------------------------------------------------------------------------------------------------------------------------------------------------------------------------------------------------------------------------------------------------------------------------------------------------------------------------------------------------------------------------------------------------------------------------------------------------------------------------------------------------------------|-----------|--------|--------------------------------|
|         |         | sulfonate, 1-<br>Aminoethane-2-<br>sulfonic acid, 2-<br>Aminoethanesulfonat<br>e, 2-<br>Aminoethanesulfonic<br>acid, 2-<br>Aminoethylsulfonate,<br>2-Aminoethylsulfonic<br>acid, 2-<br>Sulfoethylamine,<br>Aminoethylsulfonate,<br>Aminoethylsulfonic<br>acid, b-<br>Aminoethylsulfonate,<br>b-Aminoethylsulfonic<br>acid, beta-<br>Aminoethylsulfonate,<br>beta-<br>Aminoethylsulfonic<br>acid, Taurine<br>1-Aminoethane-2-<br>sulfonate, 1-<br>Aminoethane-2-<br>sulfonic acid, 2-<br>Aminoethanesulfonat<br>e, 2-<br>Aminoethanesulfonic<br>acid, 2-<br>Aminoethylsulfonate,<br>2-Aminoethylsulfonic<br>acid, 2- |           |        |                                |
| Taurine | Taurine | Aminoethylsulfonate,                                                                                                                                                                                                                                                                                                                                                                                                                                                                                                                                                                                                | HMDB00251 | C00245 | Sulfonic Acids and Derivatives |
|         | Taurine | 2-Aminoethylsulfonic                                                                                                                                                                                                                                                                                                                                                                                                                                                                                                                                                                                                | HMDB00251 | C00245 | Sulfonic Acids and Derivatives |
|         | Taurine | acid, 2-                                                                                                                                                                                                                                                                                                                                                                                                                                                                                                                                                                                                            | HMDB00251 | C00245 | Sulfonic Acids and Derivatives |

Supplement table 1

|     |                 |                                                                                                                                                                                                                                                                                                                                                                                                                                                                                                   |           |        |                             |
|-----|-----------------|---------------------------------------------------------------------------------------------------------------------------------------------------------------------------------------------------------------------------------------------------------------------------------------------------------------------------------------------------------------------------------------------------------------------------------------------------------------------------------------------------|-----------|--------|-----------------------------|
|     |                 | Threonine, (2S, 3R)-2-Amino-3-hydroxybutyrate, (2S, 3R)-2-Amino-3-hydroxybutyric acid, (R-(R*, S*))-2-Amino-3-hydroxybutanoate, (R-(R*, S*))-2-Amino-3-hydroxybutanoic acid, (S)-Threonine, 2-Amino-3-hydroxybutanoate, 2-Amino-3-hydroxybutanoic acid, 2-Amino-3-hydroxybutyrate, 2-Amino-3-hydroxybutyric acid, L-(-)-Threonine, L-2-Amino-3-hydroxybutyrate, L-2-Amino-3-hydroxybutyric acid, L-alpha-Amino-beta-hydroxybutyrate, L-alpha-Amino-beta-hydroxybutyric acid, Threonin, Threonine, |           |        |                             |
|     | L-Threonine     | [R-(R*, S*)]-2-amino-                                                                                                                                                                                                                                                                                                                                                                                                                                                                             | HMDB00167 | C00188 | Amino Acids and Derivatives |
|     | L-Allothreonine | 3-hydroxy-Butanoate,                                                                                                                                                                                                                                                                                                                                                                                                                                                                              | HMDB04041 | C05519 | Amino Acids and Derivatives |
|     | L-Threonine     | [R-(R*, S*)]-2-amino-                                                                                                                                                                                                                                                                                                                                                                                                                                                                             | HMDB00167 | C00188 | Amino Acids and Derivatives |
| Thr | L-Allothreonine | 3-hydroxy-Butanoic                                                                                                                                                                                                                                                                                                                                                                                                                                                                                | HMDB04041 | C05519 | Amino Acids and Derivatives |

Supplement table 1

|     |              |                         |           |        |                             |
|-----|--------------|-------------------------|-----------|--------|-----------------------------|
|     |              |                         |           |        |                             |
|     | L-Tryptophan |                         | HMDB00929 | C00078 | Amino Acids and Derivatives |
|     | D-Tryptophan |                         | HMDB13609 | C00525 | Amino Acids and Derivatives |
|     | L-Tryptophan |                         | HMDB00929 | C00078 | Amino Acids and Derivatives |
| Trp | D-Tryptophan | (-)-tryptophan, (2S)-2- | HMDB13609 | C00525 | Amino Acids and Derivatives |

Supplement table 1

|     |                          |                                                                                                                                                                                                                                                                                                                                                                                                                                                                                                                                                                                      |                        |                  |                                                            |
|-----|--------------------------|--------------------------------------------------------------------------------------------------------------------------------------------------------------------------------------------------------------------------------------------------------------------------------------------------------------------------------------------------------------------------------------------------------------------------------------------------------------------------------------------------------------------------------------------------------------------------------------|------------------------|------------------|------------------------------------------------------------|
|     |                          | hydroxyhydrocinnamate, (-)- $\alpha$ -Amino-p-hydroxyhydrocinnamic acid, (-)- $\alpha$ -Amino-p-hydroxyhydrocinnamate, (-)- $\alpha$ -Amino-p-hydroxyhydrocinnamic acid, (S)-(-)-Tyrosine, (S)-2-Amino-3-(p-hydroxyphenyl)propionate, (S)-2-Amino-3-(p-hydroxyphenyl)propionic acid, (S)-3-(p-Hydroxyphenyl)alanine, (S)- $\alpha$ -amino-4-hydroxy-Benzenepropanoate, (S)- $\alpha$ -amino-4-hydroxy-Benzenepropanoic acid, (S)- $\alpha$ -Amino-4-hydroxybenzenepropanoate, (S)- $\alpha$ -Amino-4-hydroxybenzenepropanoic acid, (S)- $\alpha$ -amino-4-hydroxy-Benzenepropanoate, |                        |                  |                                                            |
| Tyr | L-Tyrosine<br>L-Tyrosine |                                                                                                                                                                                                                                                                                                                                                                                                                                                                                                                                                                                      | HMDB00158<br>HMDB00158 | C00082<br>C00082 | Amino Acids and Derivatives<br>Amino Acids and Derivatives |

Supplement table 1

|     |                      |                                                                                                                                                                                                                                                                                                                                                                                                                                                                                                                                           |                        |                  |                                                            |
|-----|----------------------|-------------------------------------------------------------------------------------------------------------------------------------------------------------------------------------------------------------------------------------------------------------------------------------------------------------------------------------------------------------------------------------------------------------------------------------------------------------------------------------------------------------------------------------------|------------------------|------------------|------------------------------------------------------------|
| Val | L-Valine<br>L-Valine | methylbutanoate, (2S)-2-Amino-3-methylbutanoic acid, (S)-2-amino-3-methyl-Butanoate, (S)-2-amino-3-methyl-Butanoic acid, (S)-2-Amino-3-methylbutanoate, (S)-2-Amino-3-methylbutanoic acid, (S)-2-Amino-3-methylbutyrate, (S)-2-Amino-3-methylbutyric acid, (S)-a-Amino-b-methylbutyrate, (S)-a-Amino-b-methylbutyric acid, (S)-alpha-Amino-beta-methylbutyrate, (S)-alpha-Amino-beta-methylbutyric acid, (S)-Valine, 2-Amino-3-methylbutanoate, 2-Amino-3-methylbutanoic acid, 2-Amino-3-methylbutyrate, 2-Amino-3-methylbutyric acid, L- | HMDB00883<br>HMDB00883 | C00183<br>C00183 | Amino Acids and Derivatives<br>Amino Acids and Derivatives |
|-----|----------------------|-------------------------------------------------------------------------------------------------------------------------------------------------------------------------------------------------------------------------------------------------------------------------------------------------------------------------------------------------------------------------------------------------------------------------------------------------------------------------------------------------------------------------------------------|------------------------|------------------|------------------------------------------------------------|



Supplement table 1

|                |              |                                                                                                                                                                                                                                         |           |        |                      |
|----------------|--------------|-----------------------------------------------------------------------------------------------------------------------------------------------------------------------------------------------------------------------------------------|-----------|--------|----------------------|
|                |              | 1-Myristoyl-glycero-3-phosphocholine,<br>LPC(14:0),<br>LPC(14:0/0:0),<br>LyPC(14:0),<br>LyPC(14:0/0:0),<br>lysoPC a C14:0,<br>LysoPC(14:0),<br>LysoPC(14:0/0:0),<br>Lysophosphatidylcholine(14:0),<br>Lysophosphatidylcholine(14:0/0:0) |           |        |                      |
|                |              | 1-Myristoyl-glycero-3-phosphocholine,<br>LPC(14:0),<br>LPC(14:0/0:0),<br>LyPC(14:0),<br>LyPC(14:0/0:0),<br>lysoPC a C14:0,<br>LysoPC(14:0),<br>LysoPC(14:0/0:0),<br>Lysophosphatidylcholine(14:0),<br>Lysophosphatidylcholine(14:0/0:0) |           |        |                      |
| lysoPC a C14:0 | LysoPC(14:0) | Lysophosphatidylcholine(14:0/0:0)                                                                                                                                                                                                       | HMDB10379 | C04230 | Glycerophospholipids |
|                | LysoPC(14:0) | Lysophosphatidylcholine(14:0/0:0)                                                                                                                                                                                                       | HMDB10379 | C04230 | Glycerophospholipids |

Supplement table 1

|                |                              |                                                                                                                                                                                                                                                   |                        |                  |                                              |
|----------------|------------------------------|---------------------------------------------------------------------------------------------------------------------------------------------------------------------------------------------------------------------------------------------------|------------------------|------------------|----------------------------------------------|
|                |                              | 1-Palmitoyl-glycero-3-phosphocholine, 1-Palmitoyl-lysophosphatidylcholine, LPC(16:0), LPC(16:0/0:0), LyPC(16:0), LyPC(16:0/0:0), lysoPC a C16:0, LysoPC(16:0), LysoPC(16:0/0:0), Lysophosphatidylcholine(16:0), Lysophosphatidylcholine(16:0/0:0) |                        |                  |                                              |
|                |                              | 1-Palmitoyl-glycero-3-phosphocholine, 1-Palmitoyl-lysophosphatidylcholine, LPC(16:0), LPC(16:0/0:0), LyPC(16:0), LyPC(16:0/0:0), lysoPC a C16:0, LysoPC(16:0), LysoPC(16:0/0:0), Lysophosphatidylcholine(16:0),                                   |                        |                  |                                              |
| lysoPC a C16:0 | LysoPC(16:0)<br>LysoPC(16:0) | Lysophosphatidylcholine(16:0/0:0)                                                                                                                                                                                                                 | HMDB10382<br>HMDB10382 | C04230<br>C04230 | Glycerophospholipids<br>Glycerophospholipids |

Supplement table 1

|                |                                      |                                                                                                                                                                                                                                                                                                                                                                                                                                                                                                                              |                        |                  |                                              |
|----------------|--------------------------------------|------------------------------------------------------------------------------------------------------------------------------------------------------------------------------------------------------------------------------------------------------------------------------------------------------------------------------------------------------------------------------------------------------------------------------------------------------------------------------------------------------------------------------|------------------------|------------------|----------------------------------------------|
|                |                                      | glycero-3-phosphocholine, LPC(16:1), LPC(16:1/0:0), LPC(16:1n7/0:0), LPC(16:1w7/0:0), LyPC(16:1), LyPC(16:1/0:0), LyPC(16:1n7/0:0), LyPC(16:1w7/0:0), lysoPC a C16:1, LysoPC(16:1), LysoPC(16:1/0:0), LysoPC(16:1n7/0:0), LysoPC(16:1w7/0:0), Lysophosphatidylcholine(16:1), Lysophosphatidylcholine(16:1/0:0), Lysophosphatidylcholine(16:1n7/0:0), Lysophosphatidylcholine(16:1w7/0:0)<br>1-Palmitoleoyl-glycero-3-phosphocholine, LPC(16:1), LPC(16:1/0:0), LPC(16:1n7/0:0), LPC(16:1w7/0:0), LyPC(16:1), LyPC(16:1/0:0), |                        |                  |                                              |
| lysoPC a C16:1 | LysoPC(16:1(9Z))<br>LysoPC(16:1(9Z)) | LyPC(16:1),<br>LyPC(16:1/0:0),                                                                                                                                                                                                                                                                                                                                                                                                                                                                                               | HMDB10383<br>HMDB10383 | C04230<br>C04230 | Glycerophospholipids<br>Glycerophospholipids |

Supplement table 1

|                |              |                                                                                                                                                                                                                  |           |        |                      |
|----------------|--------------|------------------------------------------------------------------------------------------------------------------------------------------------------------------------------------------------------------------|-----------|--------|----------------------|
|                |              | 1-Heptadecanoyl-glycero-3-phosphocholine, LPC(17:0), LPC(17:0/0:0), LyPC(17:0), LyPC(17:0/0:0), lysoPC a C17:0, LysoPC(17:0), LysoPC(17:0/0:0), Lysophosphatidylcholine(17:0), Lysophosphatidylcholine(17:0/0:0) |           |        |                      |
|                |              | 1-Heptadecanoyl-glycero-3-phosphocholine, LPC(17:0), LPC(17:0/0:0), LyPC(17:0), LyPC(17:0/0:0), lysoPC a C17:0, LysoPC(17:0), LysoPC(17:0/0:0), Lysophosphatidylcholine(17:0),                                   |           |        |                      |
| lysoPC a C17:0 | LysoPC(17:0) | Lysophosphatidylcholine(17:0/0:0)                                                                                                                                                                                | HMDB12108 | C04230 | Glycerophospholipids |
|                | LysoPC(17:0) |                                                                                                                                                                                                                  | HMDB12108 | C04230 | Glycerophospholipids |

Supplement table 1

|                |                                                                      |                                                                                                                                                                                                                                                                                                                                                                                                                                                                                                                                                                                                             |                                                  |                  |                                                                                              |
|----------------|----------------------------------------------------------------------|-------------------------------------------------------------------------------------------------------------------------------------------------------------------------------------------------------------------------------------------------------------------------------------------------------------------------------------------------------------------------------------------------------------------------------------------------------------------------------------------------------------------------------------------------------------------------------------------------------------|--------------------------------------------------|------------------|----------------------------------------------------------------------------------------------|
|                |                                                                      | phosphocholine,<br>LPC(18:0),<br>LPC(18:0/0:0),<br>LyPC(18:0),<br>LyPC(18:0/0:0),<br>lysoPC a C18:0,<br>LysoPC(18:0),<br>LysoPC(18:0/0:0),<br>Lysophosphatidylchol<br>ine(18:0),<br>Lysophosphatidylchol<br>ine(18:0/0:0)<br>1-Hydroxy-2-<br>Octadecanoyl-sn-<br>glycero-3-<br>phosphocholine, 1-<br>Hydroxy-2-stearoyl-<br>sn-glycero-3-<br>phosphocholine,<br>Lysophosphatidylchol<br>ine, Stearoyl<br>lysophosphatidylcholi<br>ne<br>1-Stearoyl-glycero-3-<br>phosphocholine,<br>LPC(18:0),<br>LPC(18:0/0:0),<br>LyPC(18:0),<br>LyPC(18:0/0:0),<br>lysoPC a C18:0,<br>LysoPC(18:0),<br>LysoPC(18:0/0:0), |                                                  |                  |                                                                                              |
| lysoPC a C18:0 | LysoPC(18:0)<br>LysoPC(0:0/18:0)<br>LysoPC(18:0)<br>LysoPC(0:0/18:0) |                                                                                                                                                                                                                                                                                                                                                                                                                                                                                                                                                                                                             | HMDB10384<br>HMDB11128<br>HMDB10384<br>HMDB11128 | C04230<br>C04230 | Glycerophospholipids<br>Glycerophospholipids<br>Glycerophospholipids<br>Glycerophospholipids |

Supplement table 1

|                |                   |                                                                                                                                                                                                                                                                                                                                                                                                                                                                                                  |           |        |                      |
|----------------|-------------------|--------------------------------------------------------------------------------------------------------------------------------------------------------------------------------------------------------------------------------------------------------------------------------------------------------------------------------------------------------------------------------------------------------------------------------------------------------------------------------------------------|-----------|--------|----------------------|
|                |                   | sn-glycero-3-phosphocholine, 1-Oleoyl-sn-glycero-3-phosphocholine, 1-Oleoylglycerophosphocholine, 3-Oleoyl-rac-glycerol-1-phosphorylcholine, Choline phosphate (ester) 3-ester with 1-monoolein, Choline phosphate 3-ester with 1-monoolein, GPCCho(18:1(9Z)/0:0) [rac], LPC(18:1n9/0:0), LPC(18:1w9/0:0), LyPC(18:1), LyPC(18:1/0:0), LyPC(18:1w9/0:0), lysoPC a C18:1, LysoPC(18:1), LysoPC(18:1n9/0:0), LysoPC(18:1w9/0:0), Lysophosphatidylcholine(18:1), Lysophosphatidylcholine(18:1/0:0), |           |        |                      |
|                | LysoPC(18:1(9Z))  | Lysophosphatidylcholine(18:1n9/0:0),                                                                                                                                                                                                                                                                                                                                                                                                                                                             | HMDB02815 | C04230 | Glycerophospholipids |
|                | LysoPC(18:1(11Z)) | Lysophosphatidylcholine(18:1w9/0:0),                                                                                                                                                                                                                                                                                                                                                                                                                                                             | HMDB10385 | C04230 | Glycerophospholipids |
|                | LysoPC(18:1(9Z))  | Lysophosphatidylcholine(18:1n9/0:0),                                                                                                                                                                                                                                                                                                                                                                                                                                                             | HMDB02815 | C04230 | Glycerophospholipids |
| lysoPC a C18:1 | LysoPC(18:1(11Z)) | Lysophosphatidylcholine(18:1w9/0:0),                                                                                                                                                                                                                                                                                                                                                                                                                                                             | HMDB10385 | C04230 | Glycerophospholipids |

Supplement table 1

|                |                                              |                                                                                                                                                                                                                                                                                                                                                                                                                                                                                                                                                                                                                                                    |                        |                  |                                              |
|----------------|----------------------------------------------|----------------------------------------------------------------------------------------------------------------------------------------------------------------------------------------------------------------------------------------------------------------------------------------------------------------------------------------------------------------------------------------------------------------------------------------------------------------------------------------------------------------------------------------------------------------------------------------------------------------------------------------------------|------------------------|------------------|----------------------------------------------|
|                |                                              | phosphocholine,<br>LPC(18:2),<br>LPC(18:2/0:0),<br>LPC(18:2n6/0:0),<br>LPC(18:2w6/0:0),<br>LyPC(18:2),<br>LyPC(18:2/0:0),<br>LyPC(18:2n6/0:0),<br>LyPC(18:2w6/0:0),<br>lysoPC a C18:2,<br>LysoPC(18:2),<br>LysoPC(18:2/0:0),<br>LysoPC(18:2n6/0:0),<br>LysoPC(18:2w6/0:0),<br>Lysophosphatidylchol<br>ine(18:2),<br>Lysophosphatidylchol<br>ine(18:2/0:0),<br>Lysophosphatidylchol<br>ine(18:2n6/0:0),<br>Lysophosphatidylchol<br>ine(18:2w6/0:0)<br>1-Linoleoyl-glycero-3-<br>phosphocholine,<br>LPC(18:2),<br>LPC(18:2/0:0),<br>LPC(18:2n6/0:0),<br>LPC(18:2w6/0:0),<br>LyPC(18:2),<br>LyPC(18:2/0:0),<br>LyPC(18:2n6/0:0),<br>LyPC(18:2w6/0:0), |                        |                  |                                              |
| lysoPC a C18:2 | LysoPC(18:2(9Z,12Z))<br>LysoPC(18:2(9Z,12Z)) |                                                                                                                                                                                                                                                                                                                                                                                                                                                                                                                                                                                                                                                    | HMDB10386<br>HMDB10386 | C04230<br>C04230 | Glycerophospholipids<br>Glycerophospholipids |

Supplement table 1

|                |                              |                                                                                                                                                                                                                                                                                                                                                                                                                                                                                         |                                     |                            |                                                                      |
|----------------|------------------------------|-----------------------------------------------------------------------------------------------------------------------------------------------------------------------------------------------------------------------------------------------------------------------------------------------------------------------------------------------------------------------------------------------------------------------------------------------------------------------------------------|-------------------------------------|----------------------------|----------------------------------------------------------------------|
|                |                              | phosphocholine,<br>LPC(20:3),<br>LPC(20:3/0:0),<br>LPC(20:3n9/0:0),<br>LPC(20:3w9/0:0),<br>LyPC(20:3),<br>LyPC(20:3/0:0),<br>LyPC(20:3n9/0:0),<br>LyPC(20:3w9/0:0),<br>lysoPC a C20:3,<br>LysoPC(20:3),<br>LysoPC(20:3/0:0),<br>LysoPC(20:3n9/0:0),<br>LysoPC(20:3w9/0:0),<br>Lysophosphatidylchol<br>ine(20:3),<br>Lysophosphatidylchol<br>ine(20:3/0:0),<br>Lysophosphatidylchol<br>ine(20:3n9/0:0),<br>Lysophosphatidylchol<br>ine(20:3w9/0:0)<br>1-Homo-g-linolenoyl-<br>glycero-3- |                                     |                            |                                                                      |
|                | LysoPC(20:3(5Z,8Z,1<br>1Z))  | phosphocholine, 1-<br>Homo-gamma-                                                                                                                                                                                                                                                                                                                                                                                                                                                       |                                     |                            |                                                                      |
|                | LysoPC(20:3(8Z,11Z,<br>14Z)) | linolenoyl-glycero-3-                                                                                                                                                                                                                                                                                                                                                                                                                                                                   |                                     |                            |                                                                      |
|                | LysoPC(20:3(5Z,8Z,1<br>1Z))  | phosphocholine,<br>LPC(20:3),                                                                                                                                                                                                                                                                                                                                                                                                                                                           | HMDB10393                           | C04230                     | Glycerophospholipids                                                 |
|                | LysoPC(20:3(8Z,11Z,<br>14Z)) | LPC(20:3/0:0),<br>LPC(20:3n6/0:0),<br>LPC(20:3w6/0:0),                                                                                                                                                                                                                                                                                                                                                                                                                                  | HMDB10394<br>HMDB10393<br>HMDB10394 | C04230<br>C04230<br>C04230 | Glycerophospholipids<br>Glycerophospholipids<br>Glycerophospholipids |
| lysoPC a C20:3 |                              |                                                                                                                                                                                                                                                                                                                                                                                                                                                                                         |                                     |                            |                                                                      |



Supplement table 1

|                |                              |                                                                                                                                                                                                                                                                                                                                                                                          |           |        |                      |
|----------------|------------------------------|------------------------------------------------------------------------------------------------------------------------------------------------------------------------------------------------------------------------------------------------------------------------------------------------------------------------------------------------------------------------------------------|-----------|--------|----------------------|
|                |                              | glycero-3-phosphocholine, LPC(20:4), LPC(20:4/0:0), LPC(20:4n6/0:0), LPC(20:4w6/0:0), LyPC(20:4), LyPC(20:4/0:0), LyPC(20:4n6/0:0), LyPC(20:4w6/0:0), lysoPC a C20:4, LysoPC(20:4), LysoPC(20:4/0:0), LysoPC(20:4n6/0:0), LysoPC(20:4w6/0:0), Lysophosphatidylcholine(20:4), Lysophosphatidylcholine(20:4/0:0), Lysophosphatidylcholine(20:4n6/0:0), Lysophosphatidylcholine(20:4w6/0:0) |           |        |                      |
|                | LysoPC(20:4(5Z,8Z,11Z,14Z))  | Eicsoatetraenoyl-glycero-3-phosphocholine, 1-Eicsoate, 1-                                                                                                                                                                                                                                                                                                                                |           |        |                      |
|                | LysoPC(20:4(8Z,11Z,14Z,17Z)) | Eicsoic acid,                                                                                                                                                                                                                                                                                                                                                                            |           |        |                      |
|                | LysoPC(20:4(5Z,8Z,11Z,14Z))  | LPC(20:4),                                                                                                                                                                                                                                                                                                                                                                               | HMDB10395 | C04230 | Glycerophospholipids |
|                | LysoPC(20:4(8Z,11Z,14Z,17Z)) | LPC(20:4/0:0),                                                                                                                                                                                                                                                                                                                                                                           | HMDB10396 | C04230 | Glycerophospholipids |
|                |                              | LPC(20:4n3/0:0),                                                                                                                                                                                                                                                                                                                                                                         | HMDB10395 | C04230 | Glycerophospholipids |
| lysoPC a C20:4 |                              | LPC(20:4w3/0:0),                                                                                                                                                                                                                                                                                                                                                                         | HMDB10396 | C04230 | Glycerophospholipids |

Supplement table 1

|                |                |                                                                                                                                                                                                                |           |        |                      |
|----------------|----------------|----------------------------------------------------------------------------------------------------------------------------------------------------------------------------------------------------------------|-----------|--------|----------------------|
|                |                | 1-Lignoceroyl-glycero-3-phosphocholine, LPC(24:0), LPC(24:0/0:0), LyPC(24:0), LyPC(24:0/0:0), lysoPC a C24:0, LysoPC(24:0), LysoPC(24:0/0:0), Lysophosphatidylcholine(24:0), Lysophosphatidylcholine(24:0/0:0) |           |        |                      |
|                |                | 1-Lignoceroyl-glycero-3-phosphocholine, LPC(24:0), LPC(24:0/0:0), LyPC(24:0), LyPC(24:0/0:0), lysoPC a C24:0, LysoPC(24:0), LysoPC(24:0/0:0), Lysophosphatidylcholine(24:0),                                   |           |        |                      |
| lysoPC a C24:0 | LysoPC(24:0)   | Lysophosphatidylcholine(24:0/0:0)                                                                                                                                                                              | HMDB10405 | C04230 | Glycerophospholipids |
|                | LysoPC(24:0)   |                                                                                                                                                                                                                | HMDB10405 | C04230 | Glycerophospholipids |
| lysoPC a C26:0 | lysoPC a C26:0 | lysoPC a C26:0                                                                                                                                                                                                 | HMDB29205 |        | Glycerophospholipids |
| lysoPC a C26:1 | lysoPC a C26:1 | lysoPC a C26:1                                                                                                                                                                                                 | HMDB29220 |        | Glycerophospholipids |
| lysoPC a C28:0 | lysoPC a C28:0 | lysoPC a C28:0                                                                                                                                                                                                 | HMDB29206 |        | Glycerophospholipids |
| lysoPC a C28:1 | lysoPC a C28:1 | lysoPC a C28:1                                                                                                                                                                                                 | HMDB29221 |        | Glycerophospholipids |
